# Supplementary material for: Melatonin and Leishmania amazonensis Infection Altered miR-294, miR-30e, and miR-302d Impacting on Tnf, Mcp-1, and Nos2 Expression
Source: Front Cell Infect Microbiol. 2019 Mar 20;9:60. doi: 10.3389/fcimb.2019.00060 (PMC6435487; doi:10.3389/fcimb.2019.00060)
Supplement: Supplementary Table 6 — Predicted mRNA-targets for miR-495. The miRNA-mRNA interaction was predicted using miRecord tools (http://c1.accurascience.com/miRecords/) based in the integration of various prediction tools: DIANA-microT, MicroInspector, miRanda, MirTarget2, miTarget, NBmiRTar, PicTar, PITA, RNA22, RNAhybrid, and TargetScan/TargertScanS. [file Table_6.XLS]

# "1" : interaction predicted; "0" : interaction not predicted.
miRNA ID	miRNA Acc	Refseq	Symbol	Description	diana	microinspector	miranda	mirtarget2	mitarget	nbmirtar	pictar	pita	rna22	rnahybrid	targetscan
mmu-miR-495	MIMAT0003456	NM_001001881	2510009E07Rik	RIKEN cDNA 2510009E07 gene	0	0	1	1	0	0	0	1	0	1	0
mmu-miR-495	MIMAT0003456	NM_001001979	Megf10	multiple EGF-like-domains 10	0	0	1	1	0	0	0	1	0	1	0
mmu-miR-495	MIMAT0003456	NM_001002268	Gpr126	G protein-coupled receptor 126	0	0	1	1	0	0	0	1	0	1	0
mmu-miR-495	MIMAT0003456	NM_001003717	Osbpl8	oxysterol binding protein-like 8	0	0	1	1	0	0	0	1	0	1	0
mmu-miR-495	MIMAT0003456	NM_001003898	Tardbp	TAR DNA binding protein	0	0	1	1	0	0	0	1	0	1	0
mmu-miR-495	MIMAT0003456	NM_001003899	Tardbp	TAR DNA binding protein	0	0	1	1	0	0	0	1	0	1	0
mmu-miR-495	MIMAT0003456	NM_001003933	Rtn3	reticulon 3	0	0	1	1	0	0	0	1	0	1	0
mmu-miR-495	MIMAT0003456	NM_001004139	Zfp619	zinc finger protein 619	0	0	1	1	0	0	0	1	0	1	0
mmu-miR-495	MIMAT0003456	NM_001004143	Usp22	ubiquitin specific peptidase 22	0	0	1	1	0	0	0	1	0	1	0
mmu-miR-495	MIMAT0003456	NM_001004367	Cxxc4	CXXC finger 4	0	0	1	1	0	0	0	1	0	1	0
mmu-miR-495	MIMAT0003456	NM_001005419	Ado	2-aminoethanethiol (cysteamine) dioxygenase	0	0	1	1	0	0	0	1	0	1	0
mmu-miR-495	MIMAT0003456	NM_001005421	Amica1	adhesion molecule, interacts with CXADR antigen 1	0	0	1	1	0	0	0	1	0	1	0
mmu-miR-495	MIMAT0003456	NM_001007576	Gucy2f	guanylate cyclase 2f	0	0	1	1	0	0	0	1	0	1	0
mmu-miR-495	MIMAT0003456	NM_001008545	Tardbp	TAR DNA binding protein	0	0	1	1	0	0	0	1	0	1	0
mmu-miR-495	MIMAT0003456	NM_001008546	Tardbp	TAR DNA binding protein	0	0	1	1	0	0	0	1	0	1	0
mmu-miR-495	MIMAT0003456	NM_001009949	Mcart1	mitochondrial carrier triple repeat 1	0	0	1	1	0	0	0	1	0	1	0
mmu-miR-495	MIMAT0003456	NM_001012324	Ecm2	extracellular matrix protein 2, female organ and adipocyte specific	0	0	1	1	0	0	0	1	0	1	0
mmu-miR-495	MIMAT0003456	NM_001012477	Cxcl12	chemokine (C-X-C motif) ligand 12	0	0	1	1	0	0	0	1	0	1	0
mmu-miR-495	MIMAT0003456	NM_001013028	AI597468	expressed sequence AI597468	0	0	1	1	0	0	0	1	0	1	0
mmu-miR-495	MIMAT0003456	NM_001013371	Dtx3l	deltex 3-like (Drosophila)	0	0	1	1	0	0	0	1	0	1	0
mmu-miR-495	MIMAT0003456	NM_001013377	E130306D19Rik	RIKEN cDNA E130306D19 gene	0	0	1	1	0	0	0	1	0	1	0
mmu-miR-495	MIMAT0003456	NM_001013391	Cpsf6	cleavage and polyadenylation specific factor 6	0	0	1	1	0	0	0	1	0	1	0
mmu-miR-495	MIMAT0003456	NM_001013616	Trim6	tripartite motif-containing 6	0	0	1	1	0	0	0	1	0	1	0
mmu-miR-495	MIMAT0003456	NM_001013806	Ankrd13c	ankyrin repeat domain 13c	0	0	1	1	0	0	0	1	0	1	0
mmu-miR-495	MIMAT0003456	NM_001014288	Ptprd	protein tyrosine phosphatase, receptor type, D	0	0	1	1	0	0	0	1	0	1	0
mmu-miR-495	MIMAT0003456	NM_001015099	6030408C04Rik	RIKEN cDNA 6030408C04 gene	0	0	1	1	0	0	0	1	0	1	0
mmu-miR-495	MIMAT0003456	NM_001017985	C2cd3	C2 calcium-dependent domain containing 3	0	0	1	1	0	0	0	1	0	1	0
mmu-miR-495	MIMAT0003456	NM_001024135	Kbtbd7	kelch repeat and BTB (POZ) domain containing 7	0	0	1	1	0	0	0	1	0	1	0
mmu-miR-495	MIMAT0003456	NM_001024147	EG545758	predicted gene, EG545758	0	0	1	1	0	0	0	1	0	1	0
mmu-miR-495	MIMAT0003456	NM_001024205	Nufip2	nuclear fragile X mental retardation protein interacting protein 2	0	0	1	1	0	0	0	1	0	1	0
mmu-miR-495	MIMAT0003456	NM_001024468	Bcat1	branched chain aminotransferase 1, cytosolic	0	0	1	1	0	0	0	1	0	1	0
mmu-miR-495	MIMAT0003456	NM_001024526	Larp4	La ribonucleoprotein domain family, member 4	0	0	1	1	0	0	0	1	0	1	0
mmu-miR-495	MIMAT0003456	NM_001024727	EG545952	predicted gene, EG545952	0	0	1	1	0	0	0	1	0	1	0
mmu-miR-495	MIMAT0003456	NM_001024950	Zfp563	zinc finger protein 563	0	0	1	1	0	0	0	1	0	1	0
mmu-miR-495	MIMAT0003456	NM_001024955	Pik3r1	phosphatidylinositol 3-kinase, regulatory subunit, polypeptide 1 (p85 alpha)	0	0	1	1	0	0	0	1	0	1	0
mmu-miR-495	MIMAT0003456	NM_001025309	Pja2	praja 2, RING-H2 motif containing	0	0	1	1	0	0	0	1	0	1	0
mmu-miR-495	MIMAT0003456	NM_001025312	Dclre1b	DNA cross-link repair 1B, PSO2 homolog (S. cerevisiae)	0	0	1	1	0	0	0	1	0	1	0
mmu-miR-495	MIMAT0003456	NM_001025313	Tapbp	TAP binding protein	0	0	1	1	0	0	0	1	0	1	0
mmu-miR-495	MIMAT0003456	NM_001025572	Ankrd12	ankyrin repeat domain 12	0	0	1	1	0	0	0	1	0	1	0
mmu-miR-495	MIMAT0003456	NM_001025581	Kcnc2	potassium voltage gated channel, Shaw-related subfamily, member 2	0	0	1	1	0	0	0	1	0	1	0
mmu-miR-495	MIMAT0003456	NM_001025597	Ikzf1	IKAROS family zinc finger 1	0	0	1	1	0	0	0	1	0	1	0
mmu-miR-495	MIMAT0003456	NM_001025600	Cadm1	cell adhesion molecule 1	0	0	1	1	0	0	0	1	0	1	0
mmu-miR-495	MIMAT0003456	NM_001025602	Il1rl1	interleukin 1 receptor-like 1	0	0	1	1	0	0	0	1	0	1	0
mmu-miR-495	MIMAT0003456	NM_001025608	D4Ertd22e	DNA segment, Chr 4, ERATO Doi 22, expressed	0	0	1	1	0	0	0	1	0	1	0
mmu-miR-495	MIMAT0003456	NM_001026214	Entpd5	ectonucleoside triphosphate diphosphohydrolase 5	0	0	1	1	0	0	0	1	0	1	0
mmu-miR-495	MIMAT0003456	NM_001029841	Sla	src-like adaptor	0	0	1	1	0	0	0	1	0	1	0
mmu-miR-495	MIMAT0003456	NM_001029844	Vrk1	vaccinia related kinase 1	0	0	1	1	0	0	0	1	0	1	0
mmu-miR-495	MIMAT0003456	NM_001029856	Atad5	ATPase family, AAA domain containing 5	0	0	1	1	0	0	0	1	0	1	0
mmu-miR-495	MIMAT0003456	NM_001029889	Gm608	gene model 608, (NCBI)	0	0	1	1	0	0	0	1	0	1	0
mmu-miR-495	MIMAT0003456	NM_001029934	Usp32	ubiquitin specific peptidase 32	0	0	1	1	0	0	0	1	0	1	0
mmu-miR-495	MIMAT0003456	NM_001033167	Slc22a23	solute carrier family 22, member 23	0	0	1	1	0	0	0	1	0	1	0
mmu-miR-495	MIMAT0003456	NM_001033233	Tmprss11a	transmembrane protease, serine 11a	0	0	1	1	0	0	0	1	0	1	0
mmu-miR-495	MIMAT0003456	NM_001033239	Csta	cystatin A	0	0	1	1	0	0	0	1	0	1	0
mmu-miR-495	MIMAT0003456	NM_001033270	Slc4a7	solute carrier family 4, sodium bicarbonate cotransporter, member 7	0	0	1	1	0	0	0	1	0	1	0
mmu-miR-495	MIMAT0003456	NM_001033292	Espnl	espin-like	0	0	1	1	0	0	0	1	0	1	0
mmu-miR-495	MIMAT0003456	NM_001033332	Tmtc3	transmembrane and tetratricopeptide repeat containing 3	0	0	1	1	0	0	0	1	0	1	0
mmu-miR-495	MIMAT0003456	NM_001033375	A230046K03Rik	RIKEN cDNA A230046K03 gene	0	0	1	1	0	0	0	1	0	1	0
mmu-miR-495	MIMAT0003456	NM_001033380	E030018N11Rik	RIKEN cDNA E030018N11 gene	0	0	1	1	0	0	0	1	0	1	0
mmu-miR-495	MIMAT0003456	NM_001033441	Alg10b	asparagine-linked glycosylation 10 homolog B (yeast, alpha-1,2-glucosyltransferase)	0	0	1	1	0	0	0	1	0	1	0
mmu-miR-495	MIMAT0003456	NM_001033540	EG330503	predicted gene, EG330503	0	0	1	1	0	0	0	1	0	1	0
mmu-miR-495	MIMAT0003456	NM_001034881	EG432870	predicted gene, EG432870	0	0	1	1	0	0	0	1	0	1	0
mmu-miR-495	MIMAT0003456	NM_001034882	EG432879	predicted gene, EG432879	0	0	1	1	0	0	0	1	0	1	0
mmu-miR-495	MIMAT0003456	NM_001036684	Atp2b2	ATPase, Ca++ transporting, plasma membrane 2	0	0	1	1	0	0	0	1	0	1	0
mmu-miR-495	MIMAT0003456	NM_001037098	Btbd14a	BTB (POZ) domain containing 14A	0	0	1	1	0	0	0	1	0	1	0
mmu-miR-495	MIMAT0003456	NM_001037134	Ccne2	cyclin E2	0	0	1	1	0	0	0	1	0	1	0
mmu-miR-495	MIMAT0003456	NM_001037737	Arnt	aryl hydrocarbon receptor nuclear translocator	0	0	1	1	0	0	0	1	0	1	0
mmu-miR-495	MIMAT0003456	NM_001037937	Depdc6	DEP domain containing 6	0	0	1	1	0	0	0	1	0	1	0
mmu-miR-495	MIMAT0003456	NM_001038621	Rabgap1l	RAB GTPase activating protein 1-like	0	0	1	1	0	0	0	1	0	1	0
mmu-miR-495	MIMAT0003456	NM_001038637	Gng2	guanine nucleotide binding protein (G protein), gamma 2	0	0	1	1	0	0	0	1	0	1	0
mmu-miR-495	MIMAT0003456	NM_001038642	Ets1	E26 avian leukemia oncogene 1, 5" domain	0	0	1	1	0	0	0	1	0	1	0
mmu-miR-495	MIMAT0003456	NM_001038698	Elavl4	ELAV (embryonic lethal, abnormal vision, Drosophila)-like 4 (Hu antigen D)	0	0	1	1	0	0	0	1	0	1	0
mmu-miR-495	MIMAT0003456	NM_001038699	Fn3k	fructosamine 3 kinase	0	0	1	1	0	0	0	1	0	1	0
mmu-miR-495	MIMAT0003456	NM_001038839	P2rx7	purinergic receptor P2X, ligand-gated ion channel, 7	0	0	1	1	0	0	0	1	0	1	0
mmu-miR-495	MIMAT0003456	NM_001038993	Rnf38	ring finger protein 38	0	0	1	1	0	0	0	1	0	1	0
mmu-miR-495	MIMAT0003456	NM_001039059	Klhl15	kelch-like 15 (Drosophila)	0	0	1	1	0	0	0	1	0	1	0
mmu-miR-495	MIMAT0003456	NM_001039081	Mier1	mesoderm induction early response 1 homolog (Xenopus laevis	0	0	1	1	0	0	0	1	0	1	0
mmu-miR-495	MIMAT0003456	NM_001039089	Sel1l	sel-1 suppressor of lin-12-like (C. elegans)	0	0	1	1	0	0	0	1	0	1	0
mmu-miR-495	MIMAT0003456	NM_001039090	Skil	SKI-like	0	0	1	1	0	0	0	1	0	1	0
mmu-miR-495	MIMAT0003456	NM_001039092	Tom1l2	target of myb1-like 2 (chicken)	0	0	1	1	0	0	0	1	0	1	0
mmu-miR-495	MIMAT0003456	NM_001039106	Ddhd1	DDHD domain containing 1	0	0	1	1	0	0	0	1	0	1	0
mmu-miR-495	MIMAT0003456	NM_001039126	Asb1	ankyrin repeat and SOCS box-containing protein 1	0	0	1	1	0	0	0	1	0	1	0
mmu-miR-495	MIMAT0003456	NM_001039139	Camk2g	calcium/calmodulin-dependent protein kinase II gamma	0	0	1	1	0	0	0	1	0	1	0
mmu-miR-495	MIMAT0003456	NM_001039146	B430211C08Rik	RIKEN cDNA B430211C08 gene	0	0	1	1	0	0	0	1	0	1	0
mmu-miR-495	MIMAT0003456	NM_001039150	Cd44	CD44 antigen	0	0	1	1	0	0	0	1	0	1	0
mmu-miR-495	MIMAT0003456	NM_001039151	Cd44	CD44 antigen	0	0	1	1	0	0	0	1	0	1	0
mmu-miR-495	MIMAT0003456	NM_001039195	Gria2	glutamate receptor, ionotropic, AMPA2 (alpha 2)	0	0	1	1	0	0	0	1	0	1	0
mmu-miR-495	MIMAT0003456	NM_001039200	C230096C10Rik	RIKEN cDNA C230096C10 gene	0	0	1	1	0	0	0	1	0	1	0
mmu-miR-495	MIMAT0003456	NM_001039389	Wdr37	WD repeat domain 37	0	0	1	1	0	0	0	1	0	1	0
mmu-miR-495	MIMAT0003456	NM_001039485	9430028L06Rik	RIKEN cDNA 9430028L06 gene	0	0	1	1	0	0	0	1	0	1	0
mmu-miR-495	MIMAT0003456	NM_001039493	Plekhm3	pleckstrin homology domain containing, family M, member 3	0	0	1	1	0	0	0	1	0	1	0
mmu-miR-495	MIMAT0003456	NM_001039551	Cnnm3	cyclin M3	0	0	1	1	0	0	0	1	0	1	0
mmu-miR-495	MIMAT0003456	NM_001040682	Clmn	calmin	0	0	1	1	0	0	0	1	0	1	0
mmu-miR-495	MIMAT0003456	NM_001042485	Tmem183a	transmembrane protein 183A	0	0	1	1	0	0	0	1	0	1	0
mmu-miR-495	MIMAT0003456	NM_001042503	Trim71	tripartite motif-containing 71	0	0	1	1	0	0	0	1	0	1	0
mmu-miR-495	MIMAT0003456	NM_001042591	Arrdc3	arrestin domain containing 3	0	0	1	1	0	0	0	1	0	1	0
mmu-miR-495	MIMAT0003456	NM_001042620	Dhx15	DEAH (Asp-Glu-Ala-His) box polypeptide 15	0	0	1	1	0	0	0	1	0	1	0
mmu-miR-495	MIMAT0003456	NM_001042660	Smad7	MAD homolog 7 (Drosophila)	0	0	1	1	0	0	0	1	0	1	0
mmu-miR-495	MIMAT0003456	NM_001042719	Ddhd1	DDHD domain containing 1	0	0	1	1	0	0	0	1	0	1	0
mmu-miR-495	MIMAT0003456	NM_001043354	Rorb	RAR-related orphan receptor beta	0	0	1	1	0	0	0	1	0	1	0
mmu-miR-495	MIMAT0003456	NM_001044386	Zfx	zinc finger protein X-linked	0	0	1	1	0	0	0	1	0	1	0
mmu-miR-495	MIMAT0003456	NM_001044740	Slc7a2	solute carrier family 7 (cationic amino acid transporter, y+ system), member 2	0	0	1	1	0	0	0	1	0	1	0
mmu-miR-495	MIMAT0003456	NM_001044747	Zfp68	zinc finger protein 68	0	0	1	1	0	0	0	1	0	1	0
mmu-miR-495	MIMAT0003456	NM_001045530	Ccnjl	cyclin J-like	0	0	1	1	0	0	0	1	0	1	0
mmu-miR-495	MIMAT0003456	NM_001048054	Dusp16	dual specificity phosphatase 16	0	0	1	1	0	0	0	1	0	1	0
mmu-miR-495	MIMAT0003456	NM_001048141	Bdnf	brain derived neurotrophic factor	0	0	1	1	0	0	0	1	0	1	0
mmu-miR-495	MIMAT0003456	NM_001048142	Bdnf	brain derived neurotrophic factor	0	0	1	1	0	0	0	1	0	1	0
mmu-miR-495	MIMAT0003456	NM_001048177	Jak2	Janus kinase 2	0	0	1	1	0	0	0	1	0	1	0
mmu-miR-495	MIMAT0003456	NM_001048267	Tnpo1	transportin 1	0	0	1	1	0	0	0	1	0	1	0
mmu-miR-495	MIMAT0003456	NM_001076681	1810012P15Rik	RIKEN cDNA 1810012P15 gene	0	0	1	1	0	0	0	1	0	1	0
mmu-miR-495	MIMAT0003456	NM_001076789	Cbx5	chromobox homolog 5 (Drosophila HP1a)	0	0	1	1	0	0	0	1	0	1	0
mmu-miR-495	MIMAT0003456	NM_001077265	Hnrnpd	heterogeneous nuclear ribonucleoprotein D	0	0	1	1	0	0	0	1	0	1	0
mmu-miR-495	MIMAT0003456	NM_001077266	Hnrnpd	heterogeneous nuclear ribonucleoprotein D	0	0	1	1	0	0	0	1	0	1	0
mmu-miR-495	MIMAT0003456	NM_001077267	Hnrnpd	heterogeneous nuclear ribonucleoprotein D	0	0	1	1	0	0	0	1	0	1	0
mmu-miR-495	MIMAT0003456	NM_001077364	Tsc22d3	TSC22 domain family 3	0	0	1	1	0	0	0	1	0	1	0
mmu-miR-495	MIMAT0003456	NM_001077406	Nrp2	neuropilin 2	0	0	1	1	0	0	0	1	0	1	0
mmu-miR-495	MIMAT0003456	NM_001077407	Nrp2	neuropilin 2	0	0	1	1	0	0	0	1	0	1	0
mmu-miR-495	MIMAT0003456	NM_001077495	Pik3r1	phosphatidylinositol 3-kinase, regulatory subunit, polypeptide 1 (p85 alpha)	0	0	1	1	0	0	0	1	0	1	0
mmu-miR-495	MIMAT0003456	NM_001077499	Scn8a	sodium channel, voltage-gated, type VIII, alpha	0	0	1	1	0	0	0	1	0	1	0
mmu-miR-495	MIMAT0003456	NM_001077661	2010005J08Rik	RIKEN cDNA 2010005J08 gene	0	0	1	1	0	0	0	1	0	1	0
mmu-miR-495	MIMAT0003456	NM_001077707	Shprh	SNF2 histone linker PHD RING helicase	0	0	1	1	0	0	0	1	0	1	0
mmu-miR-495	MIMAT0003456	NM_001077712	Stag2	stromal antigen 2	0	0	1	1	0	0	0	1	0	1	0
mmu-miR-495	MIMAT0003456	NM_001079686	Syne1	synaptic nuclear envelope 1	0	0	1	1	0	0	0	1	0	1	0
mmu-miR-495	MIMAT0003456	NM_001079694	Sfrs5	splicing factor, arginine/serine-rich 5 (SRp40, HRS)	0	0	1	1	0	0	0	1	0	1	0
mmu-miR-495	MIMAT0003456	NM_001079695	Sfrs5	splicing factor, arginine/serine-rich 5 (SRp40, HRS)	0	0	1	1	0	0	0	1	0	1	0
mmu-miR-495	MIMAT0003456	NM_001079849	Paip1	polyadenylate binding protein-interacting protein 1	0	0	1	1	0	0	0	1	0	1	0
mmu-miR-495	MIMAT0003456	NM_001079883	Bcl11b	B-cell leukemia/lymphoma 11B	0	0	1	1	0	0	0	1	0	1	0
mmu-miR-495	MIMAT0003456	NM_001079908	Fgfr1	fibroblast growth factor receptor 1	0	0	1	1	0	0	0	1	0	1	0
mmu-miR-495	MIMAT0003456	NM_001079909	Fgfr1	fibroblast growth factor receptor 1	0	0	1	1	0	0	0	1	0	1	0
mmu-miR-495	MIMAT0003456	NM_001080118	Med1	mediator complex subunit 1	0	0	1	1	0	0	0	1	0	1	0
mmu-miR-495	MIMAT0003456	NM_001080129	Tmpo	thymopoietin	0	0	1	1	0	0	0	1	0	1	0
mmu-miR-495	MIMAT0003456	NM_001080130	Tmpo	thymopoietin	0	0	1	1	0	0	0	1	0	1	0
mmu-miR-495	MIMAT0003456	NM_001080131	Tmpo	thymopoietin	0	0	1	1	0	0	0	1	0	1	0
mmu-miR-495	MIMAT0003456	NM_001080388	Mark2	MAP/microtubule affinity-regulating kinase 2	0	0	1	1	0	0	0	1	0	1	0
mmu-miR-495	MIMAT0003456	NM_001080389	Mark2	MAP/microtubule affinity-regulating kinase 2	0	0	1	1	0	0	0	1	0	1	0
mmu-miR-495	MIMAT0003456	NM_001080390	Mark2	MAP/microtubule affinity-regulating kinase 2	0	0	1	1	0	0	0	1	0	1	0
mmu-miR-495	MIMAT0003456	NM_001080549	Hdx	highly divergent homeobox	0	0	1	1	0	0	0	1	0	1	0
mmu-miR-495	MIMAT0003456	NM_001080755	Zzz3	zinc finger, ZZ domain containing 3	0	0	1	1	0	0	0	1	0	1	0
mmu-miR-495	MIMAT0003456	NM_001080818	Cdc14a	CDC14 cell division cycle 14 homolog A (S. cerevisiae)	0	0	1	1	0	0	0	1	0	1	0
mmu-miR-495	MIMAT0003456	NM_001080927	Rbpj	recombination signal binding protein for immunoglobulin kappa J region	0	0	1	1	0	0	0	1	0	1	0
mmu-miR-495	MIMAT0003456	NM_001080932	Foxk2	forkhead box K2	0	0	1	1	0	0	0	1	0	1	0
mmu-miR-495	MIMAT0003456	NM_001080948	Larp4	La ribonucleoprotein domain family, member 4	0	0	1	1	0	0	0	1	0	1	0
mmu-miR-495	MIMAT0003456	NM_001080977	Rsbn1l	round spermatid basic protein 1-like	0	0	1	1	0	0	0	1	0	1	0
mmu-miR-495	MIMAT0003456	NM_001081013	Rlf	rearranged L-myc fusion sequence	0	0	1	1	0	0	0	1	0	1	0
mmu-miR-495	MIMAT0003456	NM_001081039	Dock9	dedicator of cytokinesis 9	0	0	1	1	0	0	0	1	0	1	0
mmu-miR-495	MIMAT0003456	NM_001081049	Mll1	myeloid/lymphoid or mixed-lineage leukemia 1	0	0	1	1	0	0	0	1	0	1	0
mmu-miR-495	MIMAT0003456	NM_001081057	4930573I19Rik	RIKEN cDNA 4930573I19 gene	0	0	1	1	0	0	0	1	0	1	0
mmu-miR-495	MIMAT0003456	NM_001081068	Zfp294	zinc finger protein 294	0	0	1	1	0	0	0	1	0	1	0
mmu-miR-495	MIMAT0003456	NM_001081086	Ppig	peptidyl-prolyl isomerase G (cyclophilin G)	0	0	1	1	0	0	0	1	0	1	0
mmu-miR-495	MIMAT0003456	NM_001081098	Zfp362	zinc finger protein 362	0	0	1	1	0	0	0	1	0	1	0
mmu-miR-495	MIMAT0003456	NM_001081101	4933407H18Rik	RIKEN cDNA 4933407H18 gene	0	0	1	1	0	0	0	1	0	1	0
mmu-miR-495	MIMAT0003456	NM_001081131	Dhtkd1	dehydrogenase E1 and transketolase domain containing 1	0	0	1	1	0	0	0	1	0	1	0
mmu-miR-495	MIMAT0003456	NM_001081141	Gabbr2	gamma-aminobutyric acid (GABA) B receptor 2	0	0	1	1	0	0	0	1	0	1	0
mmu-miR-495	MIMAT0003456	NM_001081152	Npat	nuclear protein in the AT region	0	0	1	1	0	0	0	1	0	1	0
mmu-miR-495	MIMAT0003456	NM_001081153	Unc13c	unc-13 homolog C (C. elegans)	0	0	1	1	0	0	0	1	0	1	0
mmu-miR-495	MIMAT0003456	NM_001081164	Otud4	OTU domain containing 4	0	0	1	1	0	0	0	1	0	1	0
mmu-miR-495	MIMAT0003456	NM_001081196	Hnrnpul2	heterogeneous nuclear ribonucleoprotein U-like 2	0	0	1	1	0	0	0	1	0	1	0
mmu-miR-495	MIMAT0003456	NM_001081203	Sbno1	sno, strawberry notch homolog 1 (Drosophila)	0	0	1	1	0	0	0	1	0	1	0
mmu-miR-495	MIMAT0003456	NM_001081208	Hs3st5	heparan sulfate (glucosamine) 3-O-sulfotransferase 5	0	0	1	1	0	0	0	1	0	1	0
mmu-miR-495	MIMAT0003456	NM_001081216	Phip	pleckstrin homology domain interacting protein	0	0	1	1	0	0	0	1	0	1	0
mmu-miR-495	MIMAT0003456	NM_001081221	Ercc6	excision repair cross-complementing rodent repair deficiency, complementation group 6	0	0	1	1	0	0	0	1	0	1	0
mmu-miR-495	MIMAT0003456	NM_001081225	6030443O07Rik	RIKEN cDNA 6030443O07 gene	0	0	1	1	0	0	0	1	0	1	0
mmu-miR-495	MIMAT0003456	NM_001081227	6330403A02Rik	RIKEN cDNA 6330403A02 gene	0	0	1	1	0	0	0	1	0	1	0
mmu-miR-495	MIMAT0003456	NM_001081232	D5Ertd579e	DNA segment, Chr 5, ERATO Doi 579, expressed	0	0	1	1	0	0	0	1	0	1	0
mmu-miR-495	MIMAT0003456	NM_001081237	Klhdc5	kelch domain containing 5	0	0	1	1	0	0	0	1	0	1	0
mmu-miR-495	MIMAT0003456	NM_001081242	Tln2	talin 2	0	0	1	1	0	0	0	1	0	1	0
mmu-miR-495	MIMAT0003456	NM_001081264	Alg6	asparagine-linked glycosylation 6 homolog (yeast, alpha-1,3,-glucosyltransferase)	0	0	1	1	0	0	0	1	0	1	0
mmu-miR-495	MIMAT0003456	NM_001081279	Mfhas1	malignant fibrous histiocytoma amplified sequence 1	0	0	1	1	0	0	0	1	0	1	0
mmu-miR-495	MIMAT0003456	NM_001081286	Fat1	FAT tumor suppressor homolog 1 (Drosophila)	0	0	1	1	0	0	0	1	0	1	0
mmu-miR-495	MIMAT0003456	NM_001081293	4930535B03Rik	RIKEN cDNA 4930535B03 gene	0	0	1	1	0	0	0	1	0	1	0
mmu-miR-495	MIMAT0003456	NM_001081326	Agl	amylo-1,6-glucosidase, 4-alpha-glucanotransferase	0	0	1	1	0	0	0	1	0	1	0
mmu-miR-495	MIMAT0003456	NM_001081328	Chsy3	chondroitin sulfate synthase 3	0	0	1	1	0	0	0	1	0	1	0
mmu-miR-495	MIMAT0003456	NM_001081343	3110043O21Rik	RIKEN cDNA 3110043O21 gene	0	0	1	1	0	0	0	1	0	1	0
mmu-miR-495	MIMAT0003456	NM_001081344	Stxbp5	syntaxin binding protein 5 (tomosyn)	0	0	1	1	0	0	0	1	0	1	0
mmu-miR-495	MIMAT0003456	NM_001081360	Camsap1l1	calmodulin regulated spectrin-associated protein 1-like 1	0	0	1	1	0	0	0	1	0	1	0
mmu-miR-495	MIMAT0003456	NM_001081383	Mll3	myeloid/lymphoid or mixed-lineage leukemia 3	0	0	1	1	0	0	0	1	0	1	0
mmu-miR-495	MIMAT0003456	NM_001081414	Grm5	glutamate receptor, metabotropic 5	0	0	1	1	0	0	0	1	0	1	0
mmu-miR-495	MIMAT0003456	NM_001081430	Nat12	N-acetyltransferase 12	0	0	1	1	0	0	0	1	0	1	0
mmu-miR-495	MIMAT0003456	NM_001081445	Ncam1	neural cell adhesion molecule 1	0	0	1	1	0	0	0	1	0	1	0
mmu-miR-495	MIMAT0003456	NM_001081473	Zxdb	zinc finger, X-linked, duplicated B	0	0	1	1	0	0	0	1	0	1	0
mmu-miR-495	MIMAT0003456	NM_001081477	Brwd3	bromodomain and WD repeat domain containing 3	0	0	1	1	0	0	0	1	0	1	0
mmu-miR-495	MIMAT0003456	NM_001081567	Mapk10	mitogen-activated protein kinase 10	0	0	1	1	0	0	0	1	0	1	0
mmu-miR-495	MIMAT0003456	NM_001081655	Dact3	dapper homolog 3, antagonist of beta-catenin (xenopus)	0	0	1	1	0	0	0	1	0	1	0
mmu-miR-495	MIMAT0003456	NM_001081684	Zfp295	zinc finger protein 295	0	0	1	1	0	0	0	1	0	1	0
mmu-miR-495	MIMAT0003456	NM_001081685	Zfp295	zinc finger protein 295	0	0	1	1	0	0	0	1	0	1	0
mmu-miR-495	MIMAT0003456	NM_007404	Adam9	a disintegrin and metallopeptidase domain 9 (meltrin gamma)	0	0	1	1	0	0	0	1	0	1	0
mmu-miR-495	MIMAT0003456	NM_007470	Apod	apolipoprotein D	0	0	1	1	0	0	0	1	0	1	0
mmu-miR-495	MIMAT0003456	NM_007475	Arbp	acidic ribosomal phosphoprotein P0	0	0	1	1	0	0	0	1	0	1	0
mmu-miR-495	MIMAT0003456	NM_007496	Zfhx3	zinc finger homeobox 3	0	0	1	1	0	0	0	1	0	1	0
mmu-miR-495	MIMAT0003456	NM_007497	Atf1	activating transcription factor 1	0	0	1	1	0	0	0	1	0	1	0
mmu-miR-495	MIMAT0003456	NM_007508	Atp6v1a	ATPase, H+ transporting, lysosomal V1 subunit A	0	0	1	1	0	0	0	1	0	1	0
mmu-miR-495	MIMAT0003456	NM_007514	Slc7a2	solute carrier family 7 (cationic amino acid transporter, y+ system), member 2	0	0	1	1	0	0	0	1	0	1	0
mmu-miR-495	MIMAT0003456	NM_007516	Hnrnpd	heterogeneous nuclear ribonucleoprotein D	0	0	1	1	0	0	0	1	0	1	0
mmu-miR-495	MIMAT0003456	NM_007528	Bcl6b	B-cell CLL/lymphoma 6, member B	0	0	1	1	0	0	0	1	0	1	0
mmu-miR-495	MIMAT0003456	NM_007540	Bdnf	brain derived neurotrophic factor	0	0	1	1	0	0	0	1	0	1	0
mmu-miR-495	MIMAT0003456	NM_007548	Prdm1	PR domain containing 1, with ZNF domain	0	0	1	1	0	0	0	1	0	1	0
mmu-miR-495	MIMAT0003456	NM_007552	Bmi1	Bmi1 polycomb ring finger oncogene	0	0	1	1	0	0	0	1	0	1	0
mmu-miR-495	MIMAT0003456	NM_007610	Casp2	caspase 2	0	0	1	1	0	0	0	1	0	1	0
mmu-miR-495	MIMAT0003456	NM_007615	Ctnnd1	catenin (cadherin associated protein), delta 1	0	0	1	1	0	0	0	1	0	1	0
mmu-miR-495	MIMAT0003456	NM_007625	Cbx4	chromobox homolog 4 (Drosophila Pc class)	0	0	1	1	0	0	0	1	0	1	0
mmu-miR-495	MIMAT0003456	NM_007626	Cbx5	chromobox homolog 5 (Drosophila HP1a)	0	0	1	1	0	0	0	1	0	1	0
mmu-miR-495	MIMAT0003456	NM_007639	Cd1d1	CD1d1 antigen	0	0	1	1	0	0	0	1	0	1	0
mmu-miR-495	MIMAT0003456	NM_007647	Entpd5	ectonucleoside triphosphate diphosphohydrolase 5	0	0	1	1	0	0	0	1	0	1	0
mmu-miR-495	MIMAT0003456	NM_007676	Psg16	pregnancy specific glycoprotein 16	0	0	1	1	0	0	0	1	0	1	0
mmu-miR-495	MIMAT0003456	NM_007697	Chl1	cell adhesion molecule with homology to L1CAM	0	0	1	1	0	0	0	1	0	1	0
mmu-miR-495	MIMAT0003456	NM_007700	Chuk	conserved helix-loop-helix ubiquitous kinase	0	0	1	1	0	0	0	1	0	1	0
mmu-miR-495	MIMAT0003456	NM_007711	Clcn3	chloride channel 3	0	0	1	1	0	0	0	1	0	1	0
mmu-miR-495	MIMAT0003456	NM_007715	Clock	circadian locomoter output cycles kaput	0	0	1	1	0	0	0	1	0	1	0
mmu-miR-495	MIMAT0003456	NM_007733	Col19a1	collagen, type XIX, alpha 1	0	0	1	1	0	0	0	1	0	1	0
mmu-miR-495	MIMAT0003456	NM_007826	Dach1	dachshund 1 (Drosophila)	0	0	1	1	0	0	0	1	0	1	0
mmu-miR-495	MIMAT0003456	NM_007856	Dhcr7	7-dehydrocholesterol reductase	0	0	1	1	0	0	0	1	0	1	0
mmu-miR-495	MIMAT0003456	NM_007862	Dlg1	discs, large homolog 1 (Drosophila)	0	0	1	1	0	0	0	1	0	1	0
mmu-miR-495	MIMAT0003456	NM_007872	Dnmt3a	DNA methyltransferase 3A	0	0	1	1	0	0	0	1	0	1	0
mmu-miR-495	MIMAT0003456	NM_007893	E4f1	E4F transcription factor 1	0	0	1	1	0	0	0	1	0	1	0
mmu-miR-495	MIMAT0003456	NM_007950	Ereg	epiregulin	0	0	1	1	0	0	0	1	0	1	0
mmu-miR-495	MIMAT0003456	NM_007961	Etv6	ets variant gene 6 (TEL oncogene)	0	0	1	1	0	0	0	1	0	1	0
mmu-miR-495	MIMAT0003456	NM_007964	Evi5	ecotropic viral integration site 5	0	0	1	1	0	0	0	1	0	1	0
mmu-miR-495	MIMAT0003456	NM_007982	Ptk2	PTK2 protein tyrosine kinase 2	0	0	1	1	0	0	0	1	0	1	0
mmu-miR-495	MIMAT0003456	NM_007983	Faf1	Fas-associated factor 1	0	0	1	1	0	0	0	1	0	1	0
mmu-miR-495	MIMAT0003456	NM_008002	Fgf10	fibroblast growth factor 10	0	0	1	1	0	0	0	1	0	1	0
mmu-miR-495	MIMAT0003456	NM_008026	Fli1	Friend leukemia integration 1	0	0	1	1	0	0	0	1	0	1	0
mmu-miR-495	MIMAT0003456	NM_008056	Fzd6	frizzled homolog 6 (Drosophila)	0	0	1	1	0	0	0	1	0	1	0
mmu-miR-495	MIMAT0003456	NM_008070	Gabrb2	gamma-aminobutyric acid (GABA-A) receptor, subunit beta 2	0	0	1	1	0	0	0	1	0	1	0
mmu-miR-495	MIMAT0003456	NM_008086	Gas1	growth arrest specific 1	0	0	1	1	0	0	0	1	0	1	0
mmu-miR-495	MIMAT0003456	NM_008115	Gfra2	glial cell line derived neurotrophic factor family receptor alpha 2	0	0	1	1	0	0	0	1	0	1	0
mmu-miR-495	MIMAT0003456	NM_008121	Gja5	gap junction membrane channel protein alpha 5	0	0	1	1	0	0	0	1	0	1	0
mmu-miR-495	MIMAT0003456	NM_008137	Gna14	guanine nucleotide binding protein, alpha 14	0	0	1	1	0	0	0	1	0	1	0
mmu-miR-495	MIMAT0003456	NM_008151	Gpr12	G-protein coupled receptor 12	0	0	1	1	0	0	0	1	0	1	0
mmu-miR-495	MIMAT0003456	NM_008163	Grb2	growth factor receptor bound protein 2	0	0	1	1	0	0	0	1	0	1	0
mmu-miR-495	MIMAT0003456	NM_008234	Hells	helicase, lymphoid specific	0	0	1	1	0	0	0	1	0	1	0
mmu-miR-495	MIMAT0003456	NM_008263	Hoxa10	homeo box A10	0	0	1	1	0	0	0	1	0	1	0
mmu-miR-495	MIMAT0003456	NM_008275	Hoxd13	homeo box D13	0	0	1	1	0	0	0	1	0	1	0
mmu-miR-495	MIMAT0003456	NM_008297	Hsf2	heat shock factor 2	0	0	1	1	0	0	0	1	0	1	0
mmu-miR-495	MIMAT0003456	NM_008300	Hspa4	heat shock protein 4	0	0	1	1	0	0	0	1	0	1	0
mmu-miR-495	MIMAT0003456	NM_008308	Htr1a	5-hydroxytryptamine (serotonin) receptor 1A	0	0	1	1	0	0	0	1	0	1	0
mmu-miR-495	MIMAT0003456	NM_008313	Htr4	5 hydroxytryptamine (serotonin) receptor 4	0	0	1	1	0	0	0	1	0	1	0
mmu-miR-495	MIMAT0003456	NM_008396	Itga2	integrin alpha 2	0	0	1	1	0	0	0	1	0	1	0
mmu-miR-495	MIMAT0003456	NM_008413	Jak2	Janus kinase 2	0	0	1	1	0	0	0	1	0	1	0
mmu-miR-495	MIMAT0003456	NM_008425	Kcnj2	potassium inwardly-rectifying channel, subfamily J, member 2	0	0	1	1	0	0	0	1	0	1	0
mmu-miR-495	MIMAT0003456	NM_008449	Kif5c	kinesin family member 5C	0	0	1	1	0	0	0	1	0	1	0
mmu-miR-495	MIMAT0003456	NM_008524	Lum	lumican	0	0	1	1	0	0	0	1	0	1	0
mmu-miR-495	MIMAT0003456	NM_008538	Marcks	myristoylated alanine rich protein kinase C substrate	0	0	1	1	0	0	0	1	0	1	0
mmu-miR-495	MIMAT0003456	NM_008539	Smad1	MAD homolog 1 (Drosophila)	0	0	1	1	0	0	0	1	0	1	0
mmu-miR-495	MIMAT0003456	NM_008592	Foxc1	forkhead box C1	0	0	1	1	0	0	0	1	0	1	0
mmu-miR-495	MIMAT0003456	NM_008599	Cxcl9	chemokine (C-X-C motif) ligand 9	0	0	1	1	0	0	0	1	0	1	0
mmu-miR-495	MIMAT0003456	NM_008607	Mmp13	matrix metallopeptidase 13	0	0	1	1	0	0	0	1	0	1	0
mmu-miR-495	MIMAT0003456	NM_008638	Mthfd2	methylenetetrahydrofolate dehydrogenase (NAD+ dependent), methenyltetrahydrofolate cyclohydrolase	0	0	1	1	0	0	0	1	0	1	0
mmu-miR-495	MIMAT0003456	NM_008679	Ncoa3	nuclear receptor coactivator 3	0	0	1	1	0	0	0	1	0	1	0
mmu-miR-495	MIMAT0003456	NM_008686	Nfe2l1	nuclear factor, erythroid derived 2,-like 1	0	0	1	1	0	0	0	1	0	1	0
mmu-miR-495	MIMAT0003456	NM_008729	Ctnnd2	catenin (cadherin associated protein), delta 2	0	0	1	1	0	0	0	1	0	1	0
mmu-miR-495	MIMAT0003456	NM_008731	Npy2r	neuropeptide Y receptor Y2	0	0	1	1	0	0	0	1	0	1	0
mmu-miR-495	MIMAT0003456	NM_008739	Nsd1	nuclear receptor-binding SET-domain protein 1	0	0	1	1	0	0	0	1	0	1	0
mmu-miR-495	MIMAT0003456	NM_008772	P2ry1	purinergic receptor P2Y, G-protein coupled 1	0	0	1	1	0	0	0	1	0	1	0
mmu-miR-495	MIMAT0003456	NM_008775	Pafah1b2	platelet-activating factor acetylhydrolase, isoform 1b, alpha2 subunit	0	0	1	1	0	0	0	1	0	1	0
mmu-miR-495	MIMAT0003456	NM_008826	Pfkl	phosphofructokinase, liver, B-type	0	0	1	1	0	0	0	1	0	1	0
mmu-miR-495	MIMAT0003456	NM_008855	Prkcb1	protein kinase C, beta 1	0	0	1	1	0	0	0	1	0	1	0
mmu-miR-495	MIMAT0003456	NM_008874	Plcb3	phospholipase C, beta 3	0	0	1	1	0	0	0	1	0	1	0
mmu-miR-495	MIMAT0003456	NM_008891	Pnn	pinin	0	0	1	1	0	0	0	1	0	1	0
mmu-miR-495	MIMAT0003456	NM_008960	Pten	phosphatase and tensin homolog	0	0	1	1	0	0	0	1	0	1	0
mmu-miR-495	MIMAT0003456	NM_008962	Ptgdr	prostaglandin D receptor	0	0	1	1	0	0	0	1	0	1	0
mmu-miR-495	MIMAT0003456	NM_008996	Rab1	RAB1, member RAS oncogene family	0	0	1	1	0	0	0	1	0	1	0
mmu-miR-495	MIMAT0003456	NM_008997	Rab11b	RAB11B, member RAS oncogene family	0	0	1	1	0	0	0	1	0	1	0
mmu-miR-495	MIMAT0003456	NM_009008	Rac2	RAS-related C3 botulinum substrate 2	0	0	1	1	0	0	0	1	0	1	0
mmu-miR-495	MIMAT0003456	NM_009029	Rb1	retinoblastoma 1	0	0	1	1	0	0	0	1	0	1	0
mmu-miR-495	MIMAT0003456	NM_009030	Rbbp4	retinoblastoma binding protein 4	0	0	1	1	0	0	0	1	0	1	0
mmu-miR-495	MIMAT0003456	NM_009031	Rbbp7	retinoblastoma binding protein 7	0	0	1	1	0	0	0	1	0	1	0
mmu-miR-495	MIMAT0003456	NM_009035	Rbpj	recombination signal binding protein for immunoglobulin kappa J region	0	0	1	1	0	0	0	1	0	1	0
mmu-miR-495	MIMAT0003456	NM_009099	Trim30	tripartite motif-containing 30	0	0	1	1	0	0	0	1	0	1	0
mmu-miR-495	MIMAT0003456	NM_009147	Sec23a	SEC23A (S. cerevisiae)	0	0	1	1	0	0	0	1	0	1	0
mmu-miR-495	MIMAT0003456	NM_009152	Sema3a	sema domain, immunoglobulin domain (Ig), short basic domain, secreted, (semaphorin) 3A	0	0	1	1	0	0	0	1	0	1	0
mmu-miR-495	MIMAT0003456	NM_009158	Mapk10	mitogen-activated protein kinase 10	0	0	1	1	0	0	0	1	0	1	0
mmu-miR-495	MIMAT0003456	NM_009159	Sfrs5	splicing factor, arginine/serine-rich 5 (SRp40, HRS)	0	0	1	1	0	0	0	1	0	1	0
mmu-miR-495	MIMAT0003456	NM_009172	Siah1a	seven in absentia 1A	0	0	1	1	0	0	0	1	0	1	0
mmu-miR-495	MIMAT0003456	NM_009178	St3gal4	ST3 beta-galactoside alpha-2,3-sialyltransferase 4	0	0	1	1	0	0	0	1	0	1	0
mmu-miR-495	MIMAT0003456	NM_009183	St8sia4	ST8 alpha-N-acetyl-neuraminide alpha-2,8-sialyltransferase 4	0	0	1	1	0	0	0	1	0	1	0
mmu-miR-495	MIMAT0003456	NM_009192	Sla	src-like adaptor	0	0	1	1	0	0	0	1	0	1	0
mmu-miR-495	MIMAT0003456	NM_009211	Smarcc1	SWI/SNF related, matrix associated, actin dependent regulator of chromatin, subfamily c, member 1	0	0	1	1	0	0	0	1	0	1	0
mmu-miR-495	MIMAT0003456	NM_009229	Sntb2	syntrophin, basic 2	0	0	1	1	0	0	0	1	0	1	0
mmu-miR-495	MIMAT0003456	NM_009230	Soat1	sterol O-acyltransferase 1	0	0	1	1	0	0	0	1	0	1	0
mmu-miR-495	MIMAT0003456	NM_009231	Sos1	Son of sevenless homolog 1 (Drosophila)	0	0	1	1	0	0	0	1	0	1	0
mmu-miR-495	MIMAT0003456	NM_009234	Sox11	SRY-box containing gene 11	0	0	1	1	0	0	0	1	0	1	0
mmu-miR-495	MIMAT0003456	NM_009260	Spnb2	spectrin beta 2	0	0	1	1	0	0	0	1	0	1	0
mmu-miR-495	MIMAT0003456	NM_009277	Trim21	tripartite motif-containing 21	0	0	1	1	0	0	0	1	0	1	0
mmu-miR-495	MIMAT0003456	NM_009288	Stk10	serine/threonine kinase 10	0	0	1	1	0	0	0	1	0	1	0
mmu-miR-495	MIMAT0003456	NM_009318	Tapbp	TAP binding protein	0	0	1	1	0	0	0	1	0	1	0
mmu-miR-495	MIMAT0003456	NM_009323	Tbx15	T-box 15	0	0	1	1	0	0	0	1	0	1	0
mmu-miR-495	MIMAT0003456	NM_009331	Tcf7	transcription factor 7, T-cell specific	0	0	1	1	0	0	0	1	0	1	0
mmu-miR-495	MIMAT0003456	NM_009348	Tectb	tectorin beta	0	0	1	1	0	0	0	1	0	1	0
mmu-miR-495	MIMAT0003456	NM_009352	Terf1	telomeric repeat binding factor 1	0	0	1	1	0	0	0	1	0	1	0
mmu-miR-495	MIMAT0003456	NM_009367	Tgfb2	transforming growth factor, beta 2	0	0	1	1	0	0	0	1	0	1	0
mmu-miR-495	MIMAT0003456	NM_009370	Tgfbr1	transforming growth factor, beta receptor I	0	0	1	1	0	0	0	1	0	1	0
mmu-miR-495	MIMAT0003456	NM_009372	Tgif1	TG interacting factor 1	0	0	1	1	0	0	0	1	0	1	0
mmu-miR-495	MIMAT0003456	NM_009391	Ran	RAN, member RAS oncogene family	0	0	1	1	0	0	0	1	0	1	0
mmu-miR-495	MIMAT0003456	NM_009443	Tgoln1	trans-golgi network protein	0	0	1	1	0	0	0	1	0	1	0
mmu-miR-495	MIMAT0003456	NM_009466	Ugdh	UDP-glucose dehydrogenase	0	0	1	1	0	0	0	1	0	1	0
mmu-miR-495	MIMAT0003456	NM_009472	Unc5c	unc-5 homolog C (C. elegans)	0	0	1	1	0	0	0	1	0	1	0
mmu-miR-495	MIMAT0003456	NM_009481	Usp9x	ubiquitin specific peptidase 9, X chromosome	0	0	1	1	0	0	0	1	0	1	0
mmu-miR-495	MIMAT0003456	NM_009497	Vamp2	vesicle-associated membrane protein 2	0	0	1	1	0	0	0	1	0	1	0
mmu-miR-495	MIMAT0003456	NM_009504	Vdr	vitamin D receptor	0	0	1	1	0	0	0	1	0	1	0
mmu-miR-495	MIMAT0003456	NM_009517	Zmat3	zinc finger matrin type 3	0	0	1	1	0	0	0	1	0	1	0
mmu-miR-495	MIMAT0003456	NM_009522	Wnt3a	wingless-related MMTV integration site 3A	0	0	1	1	0	0	0	1	0	1	0
mmu-miR-495	MIMAT0003456	NM_009524	Wnt5a	wingless-related MMTV integration site 5A	0	0	1	1	0	0	0	1	0	1	0
mmu-miR-495	MIMAT0003456	NM_009535	Yes1	Yamaguchi sarcoma viral (v-yes) oncogene homolog 1	0	0	1	1	0	0	0	1	0	1	0
mmu-miR-495	MIMAT0003456	NM_009566	Zfp92	zinc finger protein 92	0	0	1	1	0	0	0	1	0	1	0
mmu-miR-495	MIMAT0003456	NM_009573	Zic1	zinc finger protein of the cerebellum 1	0	0	1	1	0	0	0	1	0	1	0
mmu-miR-495	MIMAT0003456	NM_009575	Zic3	zinc finger protein of the cerebellum 3	0	0	1	1	0	0	0	1	0	1	0
mmu-miR-495	MIMAT0003456	NM_009608	Actc1	actin, alpha, cardiac	0	0	1	1	0	0	0	1	0	1	0
mmu-miR-495	MIMAT0003456	NM_009627	Adm	adrenomedullin	0	0	1	1	0	0	0	1	0	1	0
mmu-miR-495	MIMAT0003456	NM_009633	Adra2b	adrenergic receptor, alpha 2b	0	0	1	1	0	0	0	1	0	1	0
mmu-miR-495	MIMAT0003456	NM_009662	Alox5	arachidonate 5-lipoxygenase	0	0	1	1	0	0	0	1	0	1	0
mmu-miR-495	MIMAT0003456	NM_009677	Ap1g1	adaptor protein complex AP-1, gamma 1 subunit	0	0	1	1	0	0	0	1	0	1	0
mmu-miR-495	MIMAT0003456	NM_009691	Aplp2	amyloid beta (A4) precursor-like protein 2	0	0	1	1	0	0	0	1	0	1	0
mmu-miR-495	MIMAT0003456	NM_009709	Arnt	aryl hydrocarbon receptor nuclear translocator	0	0	1	1	0	0	0	1	0	1	0
mmu-miR-495	MIMAT0003456	NM_009717	Neurod6	neurogenic differentiation 6	0	0	1	1	0	0	0	1	0	1	0
mmu-miR-495	MIMAT0003456	NM_009723	Atp2b2	ATPase, Ca++ transporting, plasma membrane 2	0	0	1	1	0	0	0	1	0	1	0
mmu-miR-495	MIMAT0003456	NM_009730	Atrn	attractin	0	0	1	1	0	0	0	1	0	1	0
mmu-miR-495	MIMAT0003456	NM_009741	Bcl2	B-cell leukemia/lymphoma 2	0	0	1	1	0	0	0	1	0	1	0
mmu-miR-495	MIMAT0003456	NM_009763	Bst1	bone marrow stromal cell antigen 1	0	0	1	1	0	0	0	1	0	1	0
mmu-miR-495	MIMAT0003456	NM_009766	Brs3	bombesin-like receptor 3	0	0	1	1	0	0	0	1	0	1	0
mmu-miR-495	MIMAT0003456	NM_009826	Rb1cc1	RB1-inducible coiled-coil 1	0	0	1	1	0	0	0	1	0	1	0
mmu-miR-495	MIMAT0003456	NM_009829	Ccnd2	cyclin D2	0	0	1	1	0	0	0	1	0	1	0
mmu-miR-495	MIMAT0003456	NM_009830	Ccne2	cyclin E2	0	0	1	1	0	0	0	1	0	1	0
mmu-miR-495	MIMAT0003456	NM_009840	Cct8	chaperonin subunit 8 (theta)	0	0	1	1	0	0	0	1	0	1	0
mmu-miR-495	MIMAT0003456	NM_009843	Ctla4	cytotoxic T-lymphocyte-associated protein 4	0	0	1	1	0	0	0	1	0	1	0
mmu-miR-495	MIMAT0003456	NM_009851	Cd44	CD44 antigen	0	0	1	1	0	0	0	1	0	1	0
mmu-miR-495	MIMAT0003456	NM_009859	Sept7	septin 7	0	0	1	1	0	0	0	1	0	1	0
mmu-miR-495	MIMAT0003456	NM_009873	Cdk6	cyclin-dependent kinase 6	0	0	1	1	0	0	0	1	0	1	0
mmu-miR-495	MIMAT0003456	NM_009881	Cdyl	chromodomain protein, Y chromosome-like	0	0	1	1	0	0	0	1	0	1	0
mmu-miR-495	MIMAT0003456	NM_009884	Cebpg	CCAAT/enhancer binding protein (C/EBP), gamma	0	0	1	1	0	0	0	1	0	1	0
mmu-miR-495	MIMAT0003456	NM_009906	Tpp1	tripeptidyl peptidase I	0	0	1	1	0	0	0	1	0	1	0
mmu-miR-495	MIMAT0003456	NM_009911	Cxcr4	chemokine (C-X-C motif) receptor 4	0	0	1	1	0	0	0	1	0	1	0
mmu-miR-495	MIMAT0003456	NM_009952	Creb1	cAMP responsive element binding protein 1	0	0	1	1	0	0	0	1	0	1	0
mmu-miR-495	MIMAT0003456	NM_010016	Cd55	CD55 antigen	0	0	1	1	0	0	0	1	0	1	0
mmu-miR-495	MIMAT0003456	NM_010017	Dag1	dystroglycan 1	0	0	1	1	0	0	0	1	0	1	0
mmu-miR-495	MIMAT0003456	NM_010028	Ddx3x	DEAD/H (Asp-Glu-Ala-Asp/His) box polypeptide 3, X-linked	0	0	1	1	0	0	0	1	0	1	0
mmu-miR-495	MIMAT0003456	NM_010101	S1pr3	sphingosine-1-phosphate receptor 3	0	0	1	1	0	0	0	1	0	1	0
mmu-miR-495	MIMAT0003456	NM_010127	Pou6f1	POU domain, class 6, transcription factor 1	0	0	1	1	0	0	0	1	0	1	0
mmu-miR-495	MIMAT0003456	NM_010142	Ephb2	Eph receptor B2	0	0	1	1	0	0	0	1	0	1	0
mmu-miR-495	MIMAT0003456	NM_010160	Cugbp2	CUG triplet repeat, RNA binding protein 2	0	0	1	1	0	0	0	1	0	1	0
mmu-miR-495	MIMAT0003456	NM_010181	Fbn2	fibrillin 2	0	0	1	1	0	0	0	1	0	1	0
mmu-miR-495	MIMAT0003456	NM_010193	Fem1b	feminization 1 homolog b (C. elegans)	0	0	1	1	0	0	0	1	0	1	0
mmu-miR-495	MIMAT0003456	NM_010201	Fgf14	fibroblast growth factor 14	0	0	1	1	0	0	0	1	0	1	0
mmu-miR-495	MIMAT0003456	NM_010206	Fgfr1	fibroblast growth factor receptor 1	0	0	1	1	0	0	0	1	0	1	0
mmu-miR-495	MIMAT0003456	NM_010228	Flt1	FMS-like tyrosine kinase 1	0	0	1	1	0	0	0	1	0	1	0
mmu-miR-495	MIMAT0003456	NM_010243	Fut9	fucosyltransferase 9	0	0	1	1	0	0	0	1	0	1	0
mmu-miR-495	MIMAT0003456	NM_010262	Gbx2	gastrulation brain homeobox 2	0	0	1	1	0	0	0	1	0	1	0
mmu-miR-495	MIMAT0003456	NM_010264	Nr6a1	nuclear receptor subfamily 6, group A, member 1	0	0	1	1	0	0	0	1	0	1	0
mmu-miR-495	MIMAT0003456	NM_010266	Gda	guanine deaminase	0	0	1	1	0	0	0	1	0	1	0
mmu-miR-495	MIMAT0003456	NM_010282	Ggps1	geranylgeranyl diphosphate synthase 1	0	0	1	1	0	0	0	1	0	1	0
mmu-miR-495	MIMAT0003456	NM_010286	Tsc22d3	TSC22 domain family 3	0	0	1	1	0	0	0	1	0	1	0
mmu-miR-495	MIMAT0003456	NM_010290	Gjd2	gap junction protein, delta 2	0	0	1	1	0	0	0	1	0	1	0
mmu-miR-495	MIMAT0003456	NM_010303	Gna13	guanine nucleotide binding protein, alpha 13	0	0	1	1	0	0	0	1	0	1	0
mmu-miR-495	MIMAT0003456	NM_010314	Gngt1	guanine nucleotide binding protein (G protein), gamma transducing activity polypeptide 1	0	0	1	1	0	0	0	1	0	1	0
mmu-miR-495	MIMAT0003456	NM_010315	Gng2	guanine nucleotide binding protein (G protein), gamma 2	0	0	1	1	0	0	0	1	0	1	0
mmu-miR-495	MIMAT0003456	NM_010336	Lpar1	lysophosphatidic acid receptor 1	0	0	1	1	0	0	0	1	0	1	0
mmu-miR-495	MIMAT0003456	NM_010344	Gsr	glutathione reductase	0	0	1	1	0	0	0	1	0	1	0
mmu-miR-495	MIMAT0003456	NM_010347	Aes	amino-terminal enhancer of split	0	0	1	1	0	0	0	1	0	1	0
mmu-miR-495	MIMAT0003456	NM_010415	Hbegf	heparin-binding EGF-like growth factor	0	0	1	1	0	0	0	1	0	1	0
mmu-miR-495	MIMAT0003456	NM_010423	Hey1	hairy/enhancer-of-split related with YRPW motif 1	0	0	1	1	0	0	0	1	0	1	0
mmu-miR-495	MIMAT0003456	NM_010480	Hsp90aa1	heat shock protein 90, alpha (cytosolic), class A member 1	0	0	1	1	0	0	0	1	0	1	0
mmu-miR-495	MIMAT0003456	NM_010485	Elavl1	ELAV (embryonic lethal, abnormal vision, Drosophila)-like 1 (Hu antigen R)	0	0	1	1	0	0	0	1	0	1	0
mmu-miR-495	MIMAT0003456	NM_010488	Elavl4	ELAV (embryonic lethal, abnormal vision, Drosophila)-like 4 (Hu antigen D)	0	0	1	1	0	0	0	1	0	1	0
mmu-miR-495	MIMAT0003456	NM_010518	Igfbp5	insulin-like growth factor binding protein 5	0	0	1	1	0	0	0	1	0	1	0
mmu-miR-495	MIMAT0003456	NM_010548	Il10	interleukin 10	0	0	1	1	0	0	0	1	0	1	0
mmu-miR-495	MIMAT0003456	NM_010591	Jun	Jun oncogene	0	0	1	1	0	0	0	1	0	1	0
mmu-miR-495	MIMAT0003456	NM_010598	Kcnab2	potassium voltage-gated channel, shaker-related subfamily, beta member 2	0	0	1	1	0	0	0	1	0	1	0
mmu-miR-495	MIMAT0003456	NM_010608	Kcnk3	potassium channel, subfamily K, member 3	0	0	1	1	0	0	0	1	0	1	0
mmu-miR-495	MIMAT0003456	NM_010636	Klf12	Kruppel-like factor 12	0	0	1	1	0	0	0	1	0	1	0
mmu-miR-495	MIMAT0003456	NM_010638	Klf9	Kruppel-like factor 9	0	0	1	1	0	0	0	1	0	1	0
mmu-miR-495	MIMAT0003456	NM_010658	Mafb	v-maf musculoaponeurotic fibrosarcoma oncogene family, protein B (avian)	0	0	1	1	0	0	0	1	0	1	0
mmu-miR-495	MIMAT0003456	NM_010683	Lamc1	laminin, gamma 1	0	0	1	1	0	0	0	1	0	1	0
mmu-miR-495	MIMAT0003456	NM_010710	Lhx2	LIM homeobox protein 2	0	0	1	1	0	0	0	1	0	1	0
mmu-miR-495	MIMAT0003456	NM_010809	Mmp3	matrix metallopeptidase 3	0	0	1	1	0	0	0	1	0	1	0
mmu-miR-495	MIMAT0003456	NM_010828	Cited2	Cbp/p300-interacting transactivator, with Glu/Asp-rich carboxy-terminal domain, 2	0	0	1	1	0	0	0	1	0	1	0
mmu-miR-495	MIMAT0003456	NM_010863	Myo1b	myosin IB	0	0	1	1	0	0	0	1	0	1	0
mmu-miR-495	MIMAT0003456	NM_010864	Myo5a	myosin Va	0	0	1	1	0	0	0	1	0	1	0
mmu-miR-495	MIMAT0003456	NM_010891	Sept2	septin 2	0	0	1	1	0	0	0	1	0	1	0
mmu-miR-495	MIMAT0003456	NM_010899	Nfatc2	nuclear factor of activated T-cells, cytoplasmic, calcineurin-dependent 2	0	0	1	1	0	0	0	1	0	1	0
mmu-miR-495	MIMAT0003456	NM_010914	Nfyb	nuclear transcription factor-Y beta	0	0	1	1	0	0	0	1	0	1	0
mmu-miR-495	MIMAT0003456	NM_010934	Npy1r	neuropeptide Y receptor Y1	0	0	1	1	0	0	0	1	0	1	0
mmu-miR-495	MIMAT0003456	NM_010937	Nras	neuroblastoma ras oncogene	0	0	1	1	0	0	0	1	0	1	0
mmu-miR-495	MIMAT0003456	NM_011043	Pcdh10	protocadherin 10	0	0	1	1	0	0	0	1	0	1	0
mmu-miR-495	MIMAT0003456	NM_011058	Pdgfra	platelet derived growth factor receptor, alpha polypeptide	0	0	1	1	0	0	0	1	0	1	0
mmu-miR-495	MIMAT0003456	NM_011086	Pip5k3	phosphatidylinositol-3-phosphate/phosphatidylinositol 5-kinase, type III	0	0	1	1	0	0	0	1	0	1	0
mmu-miR-495	MIMAT0003456	NM_011112	Papola	poly (A) polymerase alpha	0	0	1	1	0	0	0	1	0	1	0
mmu-miR-495	MIMAT0003456	NM_011113	Plaur	plasminogen activator, urokinase receptor	0	0	1	1	0	0	0	1	0	1	0
mmu-miR-495	MIMAT0003456	NM_011143	Pou4f1	POU domain, class 4, transcription factor 1	0	0	1	1	0	0	0	1	0	1	0
mmu-miR-495	MIMAT0003456	NM_011175	Lgmn	legumain	0	0	1	1	0	0	0	1	0	1	0
mmu-miR-495	MIMAT0003456	NM_011185	Psmb1	proteasome (prosome, macropain) subunit, beta type 1	0	0	1	1	0	0	0	1	0	1	0
mmu-miR-495	MIMAT0003456	NM_011213	Ptprf	protein tyrosine phosphatase, receptor type, F	0	0	1	1	0	0	0	1	0	1	0
mmu-miR-495	MIMAT0003456	NM_011243	Rarb	retinoic acid receptor, beta	0	0	1	1	0	0	0	1	0	1	0
mmu-miR-495	MIMAT0003456	NM_011274	C80913	expressed sequence C80913	0	0	1	1	0	0	0	1	0	1	0
mmu-miR-495	MIMAT0003456	NM_011276	Rnf12	ring finger protein 12	0	0	1	1	0	0	0	1	0	1	0
mmu-miR-495	MIMAT0003456	NM_011344	Sel1l	sel-1 suppressor of lin-12-like (C. elegans)	0	0	1	1	0	0	0	1	0	1	0
mmu-miR-495	MIMAT0003456	NM_011361	Sgk1	serum/glucocorticoid regulated kinase 1	0	0	1	1	0	0	0	1	0	1	0
mmu-miR-495	MIMAT0003456	NM_011382	Six4	sine oculis-related homeobox 4 homolog (Drosophila)	0	0	1	1	0	0	0	1	0	1	0
mmu-miR-495	MIMAT0003456	NM_011386	Skil	SKI-like	0	0	1	1	0	0	0	1	0	1	0
mmu-miR-495	MIMAT0003456	NM_011406	Slc8a1	solute carrier family 8 (sodium/calcium exchanger), member 1	0	0	1	1	0	0	0	1	0	1	0
mmu-miR-495	MIMAT0003456	NM_011447	Sox8	SRY-box containing gene 8	0	0	1	1	0	0	0	1	0	1	0
mmu-miR-495	MIMAT0003456	NM_011448	Sox9	SRY-box containing gene 9	0	0	1	1	0	0	0	1	0	1	0
mmu-miR-495	MIMAT0003456	NM_011465	Spna1	spectrin alpha 1	0	0	1	1	0	0	0	1	0	1	0
mmu-miR-495	MIMAT0003456	NM_011486	Stat3	signal transducer and activator of transcription 3	0	0	1	1	0	0	0	1	0	1	0
mmu-miR-495	MIMAT0003456	NM_011521	Sdc4	syndecan 4	0	0	1	1	0	0	0	1	0	1	0
mmu-miR-495	MIMAT0003456	NM_011535	Tbx3	T-box 3	0	0	1	1	0	0	0	1	0	1	0
mmu-miR-495	MIMAT0003456	NM_011574	Cirh1a	cirrhosis, autosomal recessive 1A (human)	0	0	1	1	0	0	0	1	0	1	0
mmu-miR-495	MIMAT0003456	NM_011580	Thbs1	thrombospondin 1	0	0	1	1	0	0	0	1	0	1	0
mmu-miR-495	MIMAT0003456	NM_011581	Thbs2	thrombospondin 2	0	0	1	1	0	0	0	1	0	1	0
mmu-miR-495	MIMAT0003456	NM_011584	Nr1d2	nuclear receptor subfamily 1, group D, member 2	0	0	1	1	0	0	0	1	0	1	0
mmu-miR-495	MIMAT0003456	NM_011641	Trp63	transformation related protein 63	0	0	1	1	0	0	0	1	0	1	0
mmu-miR-495	MIMAT0003456	NM_011672	Ufd1l	ubiquitin fusion degradation 1 like	0	0	1	1	0	0	0	1	0	1	0
mmu-miR-495	MIMAT0003456	NM_011704	Vnn1	vanin 1	0	0	1	1	0	0	0	1	0	1	0
mmu-miR-495	MIMAT0003456	NM_011705	Vrk1	vaccinia related kinase 1	0	0	1	1	0	0	0	1	0	1	0
mmu-miR-495	MIMAT0003456	NM_011743	Zfp106	zinc finger protein 106	0	0	1	1	0	0	0	1	0	1	0
mmu-miR-495	MIMAT0003456	NM_011746	Mkrn3	makorin, ring finger protein, 3	0	0	1	1	0	0	0	1	0	1	0
mmu-miR-495	MIMAT0003456	NM_011768	Zfx	zinc finger protein X-linked	0	0	1	1	0	0	0	1	0	1	0
mmu-miR-495	MIMAT0003456	NM_011780	Adam23	a disintegrin and metallopeptidase domain 23	0	0	1	1	0	0	0	1	0	1	0
mmu-miR-495	MIMAT0003456	NM_011782	Adamts5	a disintegrin-like and metallopeptidase (reprolysin type) with thrombospondin type 1 motif, 5 (aggrecanase-2)	0	0	1	1	0	0	0	1	0	1	0
mmu-miR-495	MIMAT0003456	NM_011808	Ets1	E26 avian leukemia oncogene 1, 5" domain	0	0	1	1	0	0	0	1	0	1	0
mmu-miR-495	MIMAT0003456	NM_011877	Ptpn21	protein tyrosine phosphatase, non-receptor type 21	0	0	1	1	0	0	0	1	0	1	0
mmu-miR-495	MIMAT0003456	NM_011890	Sgcb	sarcoglycan, beta (dystrophin-associated glycoprotein)	0	0	1	1	0	0	0	1	0	1	0
mmu-miR-495	MIMAT0003456	NM_011935	Esrrg	estrogen-related receptor gamma	0	0	1	1	0	0	0	1	0	1	0
mmu-miR-495	MIMAT0003456	NM_011948	Map3k4	mitogen-activated protein kinase kinase kinase 4	0	0	1	1	0	0	0	1	0	1	0
mmu-miR-495	MIMAT0003456	NM_011990	Slc7a11	solute carrier family 7 (cationic amino acid transporter, y+ system), member 11	0	0	1	1	0	0	0	1	0	1	0
mmu-miR-495	MIMAT0003456	NM_012000	Cln8	ceroid-lipofuscinosis, neuronal 8	0	0	1	1	0	0	0	1	0	1	0
mmu-miR-495	MIMAT0003456	NM_012010	Eif2s3x	eukaryotic translation initiation factor 2, subunit 3, structural gene X-linked	0	0	1	1	0	0	0	1	0	1	0
mmu-miR-495	MIMAT0003456	NM_013454	Abca1	ATP-binding cassette, sub-family A (ABC1), member 1	0	0	1	1	0	0	0	1	0	1	0
mmu-miR-495	MIMAT0003456	NM_013461	Adra1a	adrenergic receptor, alpha 1a	0	0	1	1	0	0	0	1	0	1	0
mmu-miR-495	MIMAT0003456	NM_013500	Hapln1	hyaluronan and proteoglycan link protein 1	0	0	1	1	0	0	0	1	0	1	0
mmu-miR-495	MIMAT0003456	NM_013526	Gdf6	growth differentiation factor 6	0	0	1	1	0	0	0	1	0	1	0
mmu-miR-495	MIMAT0003456	NM_013555	Hoxd9	homeo box D9	0	0	1	1	0	0	0	1	0	1	0
mmu-miR-495	MIMAT0003456	NM_013634	Med1	mediator complex subunit 1	0	0	1	1	0	0	0	1	0	1	0
mmu-miR-495	MIMAT0003456	NM_013671	Sod2	superoxide dismutase 2, mitochondrial	0	0	1	1	0	0	0	1	0	1	0
mmu-miR-495	MIMAT0003456	NM_013672	Sp1	trans-acting transcription factor 1	0	0	1	1	0	0	0	1	0	1	0
mmu-miR-495	MIMAT0003456	NM_013720	Mga	MAX gene associated	0	0	1	1	0	0	0	1	0	1	0
mmu-miR-495	MIMAT0003456	NM_013760	Dnajb9	DnaJ (Hsp40) homolog, subfamily B, member 9	0	0	1	1	0	0	0	1	0	1	0
mmu-miR-495	MIMAT0003456	NM_013767	Csnk1e	casein kinase 1, epsilon	0	0	1	1	0	0	0	1	0	1	0
mmu-miR-495	MIMAT0003456	NM_013818	Gtpbp1	GTP binding protein 1	0	0	1	1	0	0	0	1	0	1	0
mmu-miR-495	MIMAT0003456	NM_013827	Mtf2	metal response element binding transcription factor 2	0	0	1	1	0	0	0	1	0	1	0
mmu-miR-495	MIMAT0003456	NM_013874	Dpf1	D4, zinc and double PHD fingers family 1	0	0	1	1	0	0	0	1	0	1	0
mmu-miR-495	MIMAT0003456	NM_013885	Clic4	chloride intracellular channel 4 (mitochondrial)	0	0	1	1	0	0	0	1	0	1	0
mmu-miR-495	MIMAT0003456	NM_013886	Hdgfrp3	hepatoma-derived growth factor, related protein 3	0	0	1	1	0	0	0	1	0	1	0
mmu-miR-495	MIMAT0003456	NM_013903	Mmp20	matrix metallopeptidase 20 (enamelysin)	0	0	1	1	0	0	0	1	0	1	0
mmu-miR-495	MIMAT0003456	NM_013915	Zfp238	zinc finger protein 238	0	0	1	1	0	0	0	1	0	1	0
mmu-miR-495	MIMAT0003456	NM_013917	Pttg1	pituitary tumor-transforming 1	0	0	1	1	0	0	0	1	0	1	0
mmu-miR-495	MIMAT0003456	NM_013930	Aass	aminoadipate-semialdehyde synthase	0	0	1	1	0	0	0	1	0	1	0
mmu-miR-495	MIMAT0003456	NM_015733	Casp9	caspase 9	0	0	1	1	0	0	0	1	0	1	0
mmu-miR-495	MIMAT0003456	NM_015751	Abce1	ATP-binding cassette, sub-family E (OABP), member 1	0	0	1	1	0	0	0	1	0	1	0
mmu-miR-495	MIMAT0003456	NM_015781	Nap1l1	nucleosome assembly protein 1-like 1	0	0	1	1	0	0	0	1	0	1	0
mmu-miR-495	MIMAT0003456	NM_015826	Dmrt1	doublesex and mab-3 related transcription factor 1	0	0	1	1	0	0	0	1	0	1	0
mmu-miR-495	MIMAT0003456	NM_016686	Vezf1	vascular endothelial zinc finger 1	0	0	1	1	0	0	0	1	0	1	0
mmu-miR-495	MIMAT0003456	NM_016688	Pdcd7	programmed cell death protein 7	0	0	1	1	0	0	0	1	0	1	0
mmu-miR-495	MIMAT0003456	NM_016708	Npy5r	neuropeptide Y receptor Y5	0	0	1	1	0	0	0	1	0	1	0
mmu-miR-495	MIMAT0003456	NM_016720	Neu3	neuraminidase 3	0	0	1	1	0	0	0	1	0	1	0
mmu-miR-495	MIMAT0003456	NM_016742	Cdc37	cell division cycle 37 homolog (S. cerevisiae)	0	0	1	1	0	0	0	1	0	1	0
mmu-miR-495	MIMAT0003456	NM_016779	Dmp1	dentin matrix protein 1	0	0	1	1	0	0	0	1	0	1	0
mmu-miR-495	MIMAT0003456	NM_016786	Ube2k	ubiquitin-conjugating enzyme E2K (UBC1 homolog, yeast)	0	0	1	1	0	0	0	1	0	1	0
mmu-miR-495	MIMAT0003456	NM_016792	Txnl1	thioredoxin-like 1	0	0	1	1	0	0	0	1	0	1	0
mmu-miR-495	MIMAT0003456	NM_016796	Vamp4	vesicle-associated membrane protein 4	0	0	1	1	0	0	0	1	0	1	0
mmu-miR-495	MIMAT0003456	NM_016803	Chst3	carbohydrate (chondroitin 6/keratan) sulfotransferase 3	0	0	1	1	0	0	0	1	0	1	0
mmu-miR-495	MIMAT0003456	NM_016804	Mtx2	metaxin 2	0	0	1	1	0	0	0	1	0	1	0
mmu-miR-495	MIMAT0003456	NM_016886	Gria3	glutamate receptor, ionotropic, AMPA3 (alpha 3)	0	0	1	1	0	0	0	1	0	1	0
mmu-miR-495	MIMAT0003456	NM_016898	Cd164	CD164 antigen	0	0	1	1	0	0	0	1	0	1	0
mmu-miR-495	MIMAT0003456	NM_016913	Porcn	porcupine homolog (Drosophila)	0	0	1	1	0	0	0	1	0	1	0
mmu-miR-495	MIMAT0003456	NM_016979	Prkx	protein kinase, X-linked	0	0	1	1	0	0	0	1	0	1	0
mmu-miR-495	MIMAT0003456	NM_017368	Cugbp1	CUG triplet repeat, RNA binding protein 1	0	0	1	1	0	0	0	1	0	1	0
mmu-miR-495	MIMAT0003456	NM_017463	Pbx2	pre B-cell leukemia transcription factor 2	0	0	1	1	0	0	0	1	0	1	0
mmu-miR-495	MIMAT0003456	NM_017469	Gucy1b3	guanylate cyclase 1, soluble, beta 3	0	0	1	1	0	0	0	1	0	1	0
mmu-miR-495	MIMAT0003456	NM_017478	Copg2	coatomer protein complex, subunit gamma 2	0	0	1	1	0	0	0	1	0	1	0
mmu-miR-495	MIMAT0003456	NM_018737	Ctps2	cytidine 5"-triphosphate synthase 2	0	0	1	1	0	0	0	1	0	1	0
mmu-miR-495	MIMAT0003456	NM_018744	Sema6a	sema domain, transmembrane domain (TM), and cytoplasmic domain, (semaphorin) 6A	0	0	1	1	0	0	0	1	0	1	0
mmu-miR-495	MIMAT0003456	NM_018770	Cadm1	cell adhesion molecule 1	0	0	1	1	0	0	0	1	0	1	0
mmu-miR-495	MIMAT0003456	NM_018776	Crlf3	cytokine receptor-like factor 3	0	0	1	1	0	0	0	1	0	1	0
mmu-miR-495	MIMAT0003456	NM_018778	Cldn8	claudin 8	0	0	1	1	0	0	0	1	0	1	0
mmu-miR-495	MIMAT0003456	NM_018800	Syt6	synaptotagmin VI	0	0	1	1	0	0	0	1	0	1	0
mmu-miR-495	MIMAT0003456	NM_018804	Syt11	synaptotagmin XI	0	0	1	1	0	0	0	1	0	1	0
mmu-miR-495	MIMAT0003456	NM_018818	Chm	choroidermia	0	0	1	1	0	0	0	1	0	1	0
mmu-miR-495	MIMAT0003456	NM_019419	Arl6ip1	ADP-ribosylation factor-like 6 interacting protein 1	0	0	1	1	0	0	0	1	0	1	0
mmu-miR-495	MIMAT0003456	NM_019494	Cxcl11	chemokine (C-X-C motif) ligand 11	0	0	1	1	0	0	0	1	0	1	0
mmu-miR-495	MIMAT0003456	NM_019505	Dgke	diacylglycerol kinase, epsilon	0	0	1	1	0	0	0	1	0	1	0
mmu-miR-495	MIMAT0003456	NM_019541	Cts8	cathepsin 8	0	0	1	1	0	0	0	1	0	1	0
mmu-miR-495	MIMAT0003456	NM_019552	Abcb10	ATP-binding cassette, sub-family B (MDR/TAP), member 10	0	0	1	1	0	0	0	1	0	1	0
mmu-miR-495	MIMAT0003456	NM_019570	Rev1	REV1 homolog (S. cerevisiae)	0	0	1	1	0	0	0	1	0	1	0
mmu-miR-495	MIMAT0003456	NM_019578	Extl1	exostoses (multiple)-like 1	0	0	1	1	0	0	0	1	0	1	0
mmu-miR-495	MIMAT0003456	NM_019693	Bat1a	HLA-B-associated transcript 1A	0	0	1	1	0	0	0	1	0	1	0
mmu-miR-495	MIMAT0003456	NM_019702	Hbs1l	Hbs1-like (S. cerevisiae)	0	0	1	1	0	0	0	1	0	1	0
mmu-miR-495	MIMAT0003456	NM_019732	Runx3	runt related transcription factor 3	0	0	1	1	0	0	0	1	0	1	0
mmu-miR-495	MIMAT0003456	NM_019734	Asah1	N-acylsphingosine amidohydrolase 1	0	0	1	1	0	0	0	1	0	1	0
mmu-miR-495	MIMAT0003456	NM_019743	Rybp	RING1 and YY1 binding protein	0	0	1	1	0	0	0	1	0	1	0
mmu-miR-495	MIMAT0003456	NM_019745	Pdcd10	programmed cell death 10	0	0	1	1	0	0	0	1	0	1	0
mmu-miR-495	MIMAT0003456	NM_019764	Amotl2	angiomotin like 2	0	0	1	1	0	0	0	1	0	1	0
mmu-miR-495	MIMAT0003456	NM_019774	Akap8	A kinase (PRKA) anchor protein 8	0	0	1	1	0	0	0	1	0	1	0
mmu-miR-495	MIMAT0003456	NM_019827	Gsk3b	glycogen synthase kinase 3 beta	0	0	1	1	0	0	0	1	0	1	0
mmu-miR-495	MIMAT0003456	NM_019835	B4galt5	UDP-Gal:betaGlcNAc beta 1,4-galactosyltransferase, polypeptide 5	0	0	1	1	0	0	0	1	0	1	0
mmu-miR-495	MIMAT0003456	NM_019868	Hnrnph2	heterogeneous nuclear ribonucleoprotein H2	0	0	1	1	0	0	0	1	0	1	0
mmu-miR-495	MIMAT0003456	NM_019914	Mllt11	myeloid/lymphoid or mixed-lineage leukemia (trithorax homolog, Drosophila); translocated to, 11	0	0	1	1	0	0	0	1	0	1	0
mmu-miR-495	MIMAT0003456	NM_019972	Sort1	sortilin 1	0	0	1	1	0	0	0	1	0	1	0
mmu-miR-495	MIMAT0003456	NM_020005	Pcaf	p300/CBP-associated factor	0	0	1	1	0	0	0	1	0	1	0
mmu-miR-495	MIMAT0003456	NM_020006	Cdc42ep4	CDC42 effector protein (Rho GTPase binding) 4	0	0	1	1	0	0	0	1	0	1	0
mmu-miR-495	MIMAT0003456	NM_020050	Tmem9b	TMEM9 domain family, member B	0	0	1	1	0	0	0	1	0	1	0
mmu-miR-495	MIMAT0003456	NM_020267	Trim44	tripartite motif-containing 44	0	0	1	1	0	0	0	1	0	1	0
mmu-miR-495	MIMAT0003456	NM_020275	Tnfrsf10b	tumor necrosis factor receptor superfamily, member 10b	0	0	1	1	0	0	0	1	0	1	0
mmu-miR-495	MIMAT0003456	NM_020508	Brd4	bromodomain containing 4	0	0	1	1	0	0	0	1	0	1	0
mmu-miR-495	MIMAT0003456	NM_020586	Herpud2	HERPUD family member 2	0	0	1	1	0	0	0	1	0	1	0
mmu-miR-495	MIMAT0003456	NM_020588	Tmem183a	transmembrane protein 183A	0	0	1	1	0	0	0	1	0	1	0
mmu-miR-495	MIMAT0003456	NM_021284	Kras	v-Ki-ras2 Kirsten rat sarcoma viral oncogene homolog	0	0	1	1	0	0	0	1	0	1	0
mmu-miR-495	MIMAT0003456	NM_021288	Tyms	thymidylate synthase	0	0	1	1	0	0	0	1	0	1	0
mmu-miR-495	MIMAT0003456	NM_021295	Lancl1	LanC (bacterial lantibiotic synthetase component C)-like 1	0	0	1	1	0	0	0	1	0	1	0
mmu-miR-495	MIMAT0003456	NM_021310	Jmy	junction-mediating and regulatory protein	0	0	1	1	0	0	0	1	0	1	0
mmu-miR-495	MIMAT0003456	NM_021382	Tacr3	tachykinin receptor 3	0	0	1	1	0	0	0	1	0	1	0
mmu-miR-495	MIMAT0003456	NM_021399	Bcl11b	B-cell leukemia/lymphoma 11B	0	0	1	1	0	0	0	1	0	1	0
mmu-miR-495	MIMAT0003456	NM_021424	Pvrl1	poliovirus receptor-related 1	0	0	1	1	0	0	0	1	0	1	0
mmu-miR-495	MIMAT0003456	NM_021448	Elp2	elongation protein 2 homolog (S. cerevisiae)	0	0	1	1	0	0	0	1	0	1	0
mmu-miR-495	MIMAT0003456	NM_021451	Pmaip1	phorbol-12-myristate-13-acetate-induced protein 1	0	0	1	1	0	0	0	1	0	1	0
mmu-miR-495	MIMAT0003456	NM_021462	Mknk2	MAP kinase-interacting serine/threonine kinase 2	0	0	1	1	0	0	0	1	0	1	0
mmu-miR-495	MIMAT0003456	NM_021465	Stag2	stromal antigen 2	0	0	1	1	0	0	0	1	0	1	0
mmu-miR-495	MIMAT0003456	NM_021510	Hnrnph1	heterogeneous nuclear ribonucleoprotein H1	0	0	1	1	0	0	0	1	0	1	0
mmu-miR-495	MIMAT0003456	NM_021716	Fign	fidgetin	0	0	1	1	0	0	0	1	0	1	0
mmu-miR-495	MIMAT0003456	NM_021878	Jarid2	jumonji, AT rich interactive domain 2	0	0	1	1	0	0	0	1	0	1	0
mmu-miR-495	MIMAT0003456	NM_021891	Fignl1	fidgetin-like 1	0	0	1	1	0	0	0	1	0	1	0
mmu-miR-495	MIMAT0003456	NM_021897	Trp53inp1	transformation related protein 53 inducible nuclear protein 1	0	0	1	1	0	0	0	1	0	1	0
mmu-miR-495	MIMAT0003456	NM_022004	Fxyd6	FXYD domain-containing ion transport regulator 6	0	0	1	1	0	0	0	1	0	1	0
mmu-miR-495	MIMAT0003456	NM_022023	Gmfb	glia maturation factor, beta	0	0	1	1	0	0	0	1	0	1	0
mmu-miR-495	MIMAT0003456	NM_022027	Syne1	synaptic nuclear envelope 1	0	0	1	1	0	0	0	1	0	1	0
mmu-miR-495	MIMAT0003456	NM_023046	Asb1	ankyrin repeat and SOCS box-containing protein 1	0	0	1	1	0	0	0	1	0	1	0
mmu-miR-495	MIMAT0003456	NM_023279	Tubb3	tubulin, beta 3	0	0	1	1	0	0	0	1	0	1	0
mmu-miR-495	MIMAT0003456	NM_023324	Peli1	pellino 1	0	0	1	1	0	0	0	1	0	1	0
mmu-miR-495	MIMAT0003456	NM_023500	Xk	Kell blood group precursor (McLeod phenotype) homolog	0	0	1	1	0	0	0	1	0	1	0
mmu-miR-495	MIMAT0003456	NM_023502	Elf2	E74-like factor 2	0	0	1	1	0	0	0	1	0	1	0
mmu-miR-495	MIMAT0003456	NM_023585	Ube2v2	ubiquitin-conjugating enzyme E2 variant 2	0	0	1	1	0	0	0	1	0	1	0
mmu-miR-495	MIMAT0003456	NM_023598	Arid5b	AT rich interactive domain 5B (Mrf1 like)	0	0	1	1	0	0	0	1	0	1	0
mmu-miR-495	MIMAT0003456	NM_023638	Porcn	porcupine homolog (Drosophila)	0	0	1	1	0	0	0	1	0	1	0
mmu-miR-495	MIMAT0003456	NM_023651	Pex13	peroxisomal biogenesis factor 13	0	0	1	1	0	0	0	1	0	1	0
mmu-miR-495	MIMAT0003456	NM_023670	Igf2bp3	insulin-like growth factor 2 mRNA binding protein 3	0	0	1	1	0	0	0	1	0	1	0
mmu-miR-495	MIMAT0003456	NM_023672	Ssbp3	single-stranded DNA binding protein 3	0	0	1	1	0	0	0	1	0	1	0
mmu-miR-495	MIMAT0003456	NM_023689	Spock3	sparc/osteonectin, cwcv and kazal-like domains proteoglycan 3	0	0	1	1	0	0	0	1	0	1	0
mmu-miR-495	MIMAT0003456	NM_023750	Zfp84	zinc finger protein 84	0	0	1	1	0	0	0	1	0	1	0
mmu-miR-495	MIMAT0003456	NM_023755	Tcfcp2l1	transcription factor CP2-like 1	0	0	1	1	0	0	0	1	0	1	0
mmu-miR-495	MIMAT0003456	NM_023814	Tbx18	T-box18	0	0	1	1	0	0	0	1	0	1	0
mmu-miR-495	MIMAT0003456	NM_024168	Tsen34	tRNA splicing endonuclease 34 homolog (SEN34, S. cerevisiae)	0	0	1	1	0	0	0	1	0	1	0
mmu-miR-495	MIMAT0003456	NM_024182	Riok3	RIO kinase 3 (yeast)	0	0	1	1	0	0	0	1	0	1	0
mmu-miR-495	MIMAT0003456	NM_024194	Lrrc40	leucine rich repeat containing 40	0	0	1	1	0	0	0	1	0	1	0
mmu-miR-495	MIMAT0003456	NM_024255	Hsdl2	hydroxysteroid dehydrogenase like 2	0	0	1	1	0	0	0	1	0	1	0
mmu-miR-495	MIMAT0003456	NM_024288	Rmnd5a	required for meiotic nuclear division 5 homolog A (S. cerevisiae)	0	0	1	1	0	0	0	1	0	1	0
mmu-miR-495	MIMAT0003456	NM_024436	Rab22a	RAB22A, member RAS oncogene family	0	0	1	1	0	0	0	1	0	1	0
mmu-miR-495	MIMAT0003456	NM_025283	Mobkl3	MOB1, Mps One Binder kinase activator-like 3 (yeast)	0	0	1	1	0	0	0	1	0	1	0
mmu-miR-495	MIMAT0003456	NM_025292	Synj2bp	synaptojanin 2 binding protein	0	0	1	1	0	0	0	1	0	1	0
mmu-miR-495	MIMAT0003456	NM_025296	Ciao1	cytosolic iron-sulfur protein assembly 1 homolog (S. cerevisiae)	0	0	1	1	0	0	0	1	0	1	0
mmu-miR-495	MIMAT0003456	NM_025301	Mrpl17	mitochondrial ribosomal protein L17	0	0	1	1	0	0	0	1	0	1	0
mmu-miR-495	MIMAT0003456	NM_025408	Phca	phytoceramidase, alkaline	0	0	1	1	0	0	0	1	0	1	0
mmu-miR-495	MIMAT0003456	NM_025461	1810020G14Rik	RIKEN cDNA 1810020G14 gene	0	0	1	1	0	0	0	1	0	1	0
mmu-miR-495	MIMAT0003456	NM_025474	Mrps14	mitochondrial ribosomal protein S14	0	0	1	1	0	0	0	1	0	1	0
mmu-miR-495	MIMAT0003456	NM_025512	Zfand1	zinc finger, AN1-type domain 1	0	0	1	1	0	0	0	1	0	1	0
mmu-miR-495	MIMAT0003456	NM_025558	Cyb5b	cytochrome b5 type B	0	0	1	1	0	0	0	1	0	1	0
mmu-miR-495	MIMAT0003456	NM_025695	Smc6	structural maintenance of chromosomes 6	0	0	1	1	0	0	0	1	0	1	0
mmu-miR-495	MIMAT0003456	NM_025773	Ube2w	ubiquitin-conjugating enzyme E2W (putative)	0	0	1	1	0	0	0	1	0	1	0
mmu-miR-495	MIMAT0003456	NM_025783	Vps24	vacuolar protein sorting 24 (yeast)	0	0	1	1	0	0	0	1	0	1	0
mmu-miR-495	MIMAT0003456	NM_025813	Mfsd1	major facilitator superfamily domain containing 1	0	0	1	1	0	0	0	1	0	1	0
mmu-miR-495	MIMAT0003456	NM_025815	Cpne8	copine VIII	0	0	1	1	0	0	0	1	0	1	0
mmu-miR-495	MIMAT0003456	NM_025822	Rsrc1	arginine/serine-rich coiled-coil 1	0	0	1	1	0	0	0	1	0	1	0
mmu-miR-495	MIMAT0003456	NM_025832	Narg1l	NMDA receptor regulated 1-like	0	0	1	1	0	0	0	1	0	1	0
mmu-miR-495	MIMAT0003456	NM_025845	Prpf38b	PRP38 pre-mRNA processing factor 38 (yeast) domain containing B	0	0	1	1	0	0	0	1	0	1	0
mmu-miR-495	MIMAT0003456	NM_025853	Dsn1	DSN1, MIND kinetochore complex component, homolog (S. cerevisiae)	0	0	1	1	0	0	0	1	0	1	0
mmu-miR-495	MIMAT0003456	NM_025875	Rbm8a	RNA binding motif protein 8a	0	0	1	1	0	0	0	1	0	1	0
mmu-miR-495	MIMAT0003456	NM_025895	Med28	mediator of RNA polymerase II transcription, subunit 28 homolog (yeast)	0	0	1	1	0	0	0	1	0	1	0
mmu-miR-495	MIMAT0003456	NM_025937	Nkap	NFKB activating protein	0	0	1	1	0	0	0	1	0	1	0
mmu-miR-495	MIMAT0003456	NM_025938	Rpp14	ribonuclease P 14 subunit (human)	0	0	1	1	0	0	0	1	0	1	0
mmu-miR-495	MIMAT0003456	NM_025950	Cdc37l1	cell division cycle 37 homolog (S. cerevisiae)-like 1	0	0	1	1	0	0	0	1	0	1	0
mmu-miR-495	MIMAT0003456	NM_025965	Ssr1	signal sequence receptor, alpha	0	0	1	1	0	0	0	1	0	1	0
mmu-miR-495	MIMAT0003456	NM_025978	Ttc14	tetratricopeptide repeat domain 14	0	0	1	1	0	0	0	1	0	1	0
mmu-miR-495	MIMAT0003456	NM_025982	Tspan31	tetraspanin 31	0	0	1	1	0	0	0	1	0	1	0
mmu-miR-495	MIMAT0003456	NM_026036	Cmtm6	CKLF-like MARVEL transmembrane domain containing 6	0	0	1	1	0	0	0	1	0	1	0
mmu-miR-495	MIMAT0003456	NM_026039	Med18	mediator of RNA polymerase II transcription, subunit 18 homolog (yeast)	0	0	1	1	0	0	0	1	0	1	0
mmu-miR-495	MIMAT0003456	NM_026046	Zfp329	zinc finger protein 329	0	0	1	1	0	0	0	1	0	1	0
mmu-miR-495	MIMAT0003456	NM_026057	Zfp422	zinc finger protein 422	0	0	1	1	0	0	0	1	0	1	0
mmu-miR-495	MIMAT0003456	NM_026141	Ppil4	peptidylprolyl isomerase (cyclophilin)-like 4	0	0	1	1	0	0	0	1	0	1	0
mmu-miR-495	MIMAT0003456	NM_026143	Far1	fatty acyl CoA reductase 1	0	0	1	1	0	0	0	1	0	1	0
mmu-miR-495	MIMAT0003456	NM_026148	Lims1	LIM and senescent cell antigen-like domains 1	0	0	1	1	0	0	0	1	0	1	0
mmu-miR-495	MIMAT0003456	NM_026155	Ssr3	signal sequence receptor, gamma	0	0	1	1	0	0	0	1	0	1	0
mmu-miR-495	MIMAT0003456	NM_026174	Entpd4	ectonucleoside triphosphate diphosphohydrolase 4	0	0	1	1	0	0	0	1	0	1	0
mmu-miR-495	MIMAT0003456	NM_026185	1300007F04Rik	RIKEN cDNA 1300007F04 gene	0	0	1	1	0	0	0	1	0	1	0
mmu-miR-495	MIMAT0003456	NM_026210	1810036I24Rik	RIKEN cDNA 1810036I24 gene	0	0	1	1	0	0	0	1	0	1	0
mmu-miR-495	MIMAT0003456	NM_026211	Tmed9	transmembrane emp24 protein transport domain containing 9	0	0	1	1	0	0	0	1	0	1	0
mmu-miR-495	MIMAT0003456	NM_026221	Ppfibp1	PTPRF interacting protein, binding protein 1 (liprin beta 1)	0	0	1	1	0	0	0	1	0	1	0
mmu-miR-495	MIMAT0003456	NM_026234	Pigm	phosphatidylinositol glycan anchor biosynthesis, class M	0	0	1	1	0	0	0	1	0	1	0
mmu-miR-495	MIMAT0003456	NM_026268	Dusp6	dual specificity phosphatase 6	0	0	1	1	0	0	0	1	0	1	0
mmu-miR-495	MIMAT0003456	NM_026283	Samd8	sterile alpha motif domain containing 8	0	0	1	1	0	0	0	1	0	1	0
mmu-miR-495	MIMAT0003456	NM_026361	Pkp4	plakophilin 4	0	0	1	1	0	0	0	1	0	1	0
mmu-miR-495	MIMAT0003456	NM_026392	Tmem70	transmembrane protein 70	0	0	1	1	0	0	0	1	0	1	0
mmu-miR-495	MIMAT0003456	NM_026401	Mrp63	mitochondrial ribosomal protein 63	0	0	1	1	0	0	0	1	0	1	0
mmu-miR-495	MIMAT0003456	NM_026484	Ccny	cyclin Y	0	0	1	1	0	0	0	1	0	1	0
mmu-miR-495	MIMAT0003456	NM_026495	Btbd14a	BTB (POZ) domain containing 14A	0	0	1	1	0	0	0	1	0	1	0
mmu-miR-495	MIMAT0003456	NM_026504	Coq5	coenzyme Q5 homolog, methyltransferase (yeast)	0	0	1	1	0	0	0	1	0	1	0
mmu-miR-495	MIMAT0003456	NM_026507	Zwilch	Zwilch, kinetochore associated, homolog (Drosophila)	0	0	1	1	0	0	0	1	0	1	0
mmu-miR-495	MIMAT0003456	NM_026521	Zfp706	zinc finger protein 706	0	0	1	1	0	0	0	1	0	1	0
mmu-miR-495	MIMAT0003456	NM_026527	Chac2	ChaC, cation transport regulator homolog 2 (E. coli)	0	0	1	1	0	0	0	1	0	1	0
mmu-miR-495	MIMAT0003456	NM_026534	3110003A22Rik	RIKEN cDNA 3110003A22 gene	0	0	1	1	0	0	0	1	0	1	0
mmu-miR-495	MIMAT0003456	NM_026556	Dynll2	dynein light chain LC8-type 2	0	0	1	1	0	0	0	1	0	1	0
mmu-miR-495	MIMAT0003456	NM_026577	Arl13b	ADP-ribosylation factor-like 13B	0	0	1	1	0	0	0	1	0	1	0
mmu-miR-495	MIMAT0003456	NM_026584	Gtf2e2	general transcription factor II E, polypeptide 2 (beta subunit)	0	0	1	1	0	0	0	1	0	1	0
mmu-miR-495	MIMAT0003456	NM_026603	Denr	density-regulated protein	0	0	1	1	0	0	0	1	0	1	0
mmu-miR-495	MIMAT0003456	NM_026609	Leprotl1	leptin receptor overlapping transcript-like 1	0	0	1	1	0	0	0	1	0	1	0
mmu-miR-495	MIMAT0003456	NM_026641	Ift80	intraflagellar transport 80 homolog (Chlamydomonas)	0	0	1	1	0	0	0	1	0	1	0
mmu-miR-495	MIMAT0003456	NM_026647	Zdhhc21	zinc finger, DHHC domain containing 21	0	0	1	1	0	0	0	1	0	1	0
mmu-miR-495	MIMAT0003456	NM_026742	1110007M04Rik	RIKEN cDNA 1110007M04 gene	0	0	1	1	0	0	0	1	0	1	0
mmu-miR-495	MIMAT0003456	NM_026754	1110017I16Rik	RIKEN cDNA 1110017I16 gene	0	0	1	1	0	0	0	1	0	1	0
mmu-miR-495	MIMAT0003456	NM_026823	Arl8a	ADP-ribosylation factor-like 8A	0	0	1	1	0	0	0	1	0	1	0
mmu-miR-495	MIMAT0003456	NM_026854	Dtwd2	DTW domain containing 2	0	0	1	1	0	0	0	1	0	1	0
mmu-miR-495	MIMAT0003456	NM_026886	1500001A10Rik	RIKEN cDNA 1500001A10 gene	0	0	1	1	0	0	0	1	0	1	0
mmu-miR-495	MIMAT0003456	NM_026893	Wdr40a	WD repeat domain 40A	0	0	1	1	0	0	0	1	0	1	0
mmu-miR-495	MIMAT0003456	NM_026989	Sfrs11	splicing factor, arginine/serine-rich 11	0	0	1	1	0	0	0	1	0	1	0
mmu-miR-495	MIMAT0003456	NM_027103	1700030J22Rik	RIKEN cDNA 1700030J22 gene	0	0	1	1	0	0	0	1	0	1	0
mmu-miR-495	MIMAT0003456	NM_027156	Ddx51	DEAD (Asp-Glu-Ala-Asp) box polypeptide 51	0	0	1	1	0	0	0	1	0	1	0
mmu-miR-495	MIMAT0003456	NM_027226	Fyttd1	forty-two-three domain containing 1	0	0	1	1	0	0	0	1	0	1	0
mmu-miR-495	MIMAT0003456	NM_027315	Ube2q1	ubiquitin-conjugating enzyme E2Q (putative) 1	0	0	1	1	0	0	0	1	0	1	0
mmu-miR-495	MIMAT0003456	NM_027321	Lrrc39	leucine rich repeat containing 39	0	0	1	1	0	0	0	1	0	1	0
mmu-miR-495	MIMAT0003456	NM_027326	Mllt3	myeloid/lymphoid or mixed-lineage leukemia (trithorax homolog, Drosophila); translocated to, 3	0	0	1	1	0	0	0	1	0	1	0
mmu-miR-495	MIMAT0003456	NM_027355	Rnf168	ring finger protein 168	0	0	1	1	0	0	0	1	0	1	0
mmu-miR-495	MIMAT0003456	NM_027373	Afap1	actin filament associated protein 1	0	0	1	1	0	0	0	1	0	1	0
mmu-miR-495	MIMAT0003456	NM_027379	Far1	fatty acyl CoA reductase 1	0	0	1	1	0	0	0	1	0	1	0
mmu-miR-495	MIMAT0003456	NM_027394	Ube2cbp	ubiquitin-conjugating enzyme E2C binding protein	0	0	1	1	0	0	0	1	0	1	0
mmu-miR-495	MIMAT0003456	NM_027416	Calml3	calmodulin-like 3	0	0	1	1	0	0	0	1	0	1	0
mmu-miR-495	MIMAT0003456	NM_027423	Polr3b	polymerase (RNA) III (DNA directed) polypeptide B	0	0	1	1	0	0	0	1	0	1	0
mmu-miR-495	MIMAT0003456	NM_027450	Glipr2	GLI pathogenesis-related 2	0	0	1	1	0	0	0	1	0	1	0
mmu-miR-495	MIMAT0003456	NM_027619	Ttc14	tetratricopeptide repeat domain 14	0	0	1	1	0	0	0	1	0	1	0
mmu-miR-495	MIMAT0003456	NM_027629	Pgm2l1	phosphoglucomutase 2-like 1	0	0	1	1	0	0	0	1	0	1	0
mmu-miR-495	MIMAT0003456	NM_027642	Phf6	PHD finger protein 6	0	0	1	1	0	0	0	1	0	1	0
mmu-miR-495	MIMAT0003456	NM_027652	D5Wsu178e	DNA segment, Chr 5, Wayne State University 178, expressed	0	0	1	1	0	0	0	1	0	1	0
mmu-miR-495	MIMAT0003456	NM_027667	Arhgap19	Rho GTPase activating protein 19	0	0	1	1	0	0	0	1	0	1	0
mmu-miR-495	MIMAT0003456	NM_027769	Cpne3	copine III	0	0	1	1	0	0	0	1	0	1	0
mmu-miR-495	MIMAT0003456	NM_027789	5430416O09Rik	RIKEN cDNA 5430416O09 gene	0	0	1	1	0	0	0	1	0	1	0
mmu-miR-495	MIMAT0003456	NM_027807	Cul5	cullin 5	0	0	1	1	0	0	0	1	0	1	0
mmu-miR-495	MIMAT0003456	NM_027864	Galnt14	UDP-N-acetyl-alpha-D-galactosamine:polypeptide N-acetylgalactosaminyltransferase 14	0	0	1	1	0	0	0	1	0	1	0
mmu-miR-495	MIMAT0003456	NM_027900	R3hdm2	R3H domain containing 2	0	0	1	1	0	0	0	1	0	1	0
mmu-miR-495	MIMAT0003456	NM_027920	March8	membrane-associated ring finger (C3HC4) 8	0	0	1	1	0	0	0	1	0	1	0
mmu-miR-495	MIMAT0003456	NM_027922	Ankle2	ankyrin repeat and LEM domain containing 2	0	0	1	1	0	0	0	1	0	1	0
mmu-miR-495	MIMAT0003456	NM_027927	Ints12	integrator complex subunit 12	0	0	1	1	0	0	0	1	0	1	0
mmu-miR-495	MIMAT0003456	NM_027940	1700001F09Rik	RIKEN cDNA 1700001F09 gene	0	0	1	1	0	0	0	1	0	1	0
mmu-miR-495	MIMAT0003456	NM_028006	Tube1	epsilon-tubulin 1	0	0	1	1	0	0	0	1	0	1	0
mmu-miR-495	MIMAT0003456	NM_028039	Esco2	establishment of cohesion 1 homolog 2 (S. cerevisiae)	0	0	1	1	0	0	0	1	0	1	0
mmu-miR-495	MIMAT0003456	NM_028059	Zfp654	zinc finger protein 654	0	0	1	1	0	0	0	1	0	1	0
mmu-miR-495	MIMAT0003456	NM_028087	Gcnt3	glucosaminyl (N-acetyl) transferase 3, mucin type	0	0	1	1	0	0	0	1	0	1	0
mmu-miR-495	MIMAT0003456	NM_028127	Frmd6	FERM domain containing 6	0	0	1	1	0	0	0	1	0	1	0
mmu-miR-495	MIMAT0003456	NM_028137	5730528L13Rik	RIKEN cDNA 5730528L13 gene	0	0	1	1	0	0	0	1	0	1	0
mmu-miR-495	MIMAT0003456	NM_028149	Fbxl20	F-box and leucine-rich repeat protein 20	0	0	1	1	0	0	0	1	0	1	0
mmu-miR-495	MIMAT0003456	NM_028150	Supt7l	suppressor of Ty 7 (S. cerevisiae)-like	0	0	1	1	0	0	0	1	0	1	0
mmu-miR-495	MIMAT0003456	NM_028166	1600014C10Rik	RIKEN cDNA 1600014C10 gene	0	0	1	1	0	0	0	1	0	1	0
mmu-miR-495	MIMAT0003456	NM_028181	Ccpg1	cell cycle progression 1	0	0	1	1	0	0	0	1	0	1	0
mmu-miR-495	MIMAT0003456	NM_028190	Luc7l	Luc7 homolog (S. cerevisiae)-like	0	0	1	1	0	0	0	1	0	1	0
mmu-miR-495	MIMAT0003456	NM_028248	Tmem87b	transmembrane protein 87B	0	0	1	1	0	0	0	1	0	1	0
mmu-miR-495	MIMAT0003456	NM_028259	Rps6kb1	ribosomal protein S6 kinase, polypeptide 1	0	0	1	1	0	0	0	1	0	1	0
mmu-miR-495	MIMAT0003456	NM_028372	2900024O10Rik	RIKEN cDNA 2900024O10 gene	0	0	1	1	0	0	0	1	0	1	0
mmu-miR-495	MIMAT0003456	NM_028399	Ccnt2	cyclin T2	0	0	1	1	0	0	0	1	0	1	0
mmu-miR-495	MIMAT0003456	NM_028428	Fut11	fucosyltransferase 11	0	0	1	1	0	0	0	1	0	1	0
mmu-miR-495	MIMAT0003456	NM_028447	Prrc1	proline-rich coiled-coil 1	0	0	1	1	0	0	0	1	0	1	0
mmu-miR-495	MIMAT0003456	NM_028459	Wasl	Wiskott-Aldrich syndrome-like (human)	0	0	1	1	0	0	0	1	0	1	0
mmu-miR-495	MIMAT0003456	NM_028523	Dcbld2	discoidin, CUB and LCCL domain containing 2	0	0	1	1	0	0	0	1	0	1	0
mmu-miR-495	MIMAT0003456	NM_028543	1700065O13Rik	RIKEN cDNA 1700065O13 gene	0	0	1	1	0	0	0	1	0	1	0
mmu-miR-495	MIMAT0003456	NM_028651	Tmtc4	transmembrane and tetratricopeptide repeat containing 4	0	0	1	1	0	0	0	1	0	1	0
mmu-miR-495	MIMAT0003456	NM_028709	Btbd11	BTB (POZ) domain containing 11	0	0	1	1	0	0	0	1	0	1	0
mmu-miR-495	MIMAT0003456	NM_028718	Traf3ip1	TNF receptor-associated factor 3 interacting protein 1	0	0	1	1	0	0	0	1	0	1	0
mmu-miR-495	MIMAT0003456	NM_028719	Cpne4	copine IV	0	0	1	1	0	0	0	1	0	1	0
mmu-miR-495	MIMAT0003456	NM_028721	Nphp3	nephronophthisis 3 (adolescent)	0	0	1	1	0	0	0	1	0	1	0
mmu-miR-495	MIMAT0003456	NM_028722	4121402D02Rik	RIKEN cDNA 4121402D02 gene	0	0	1	1	0	0	0	1	0	1	0
mmu-miR-495	MIMAT0003456	NM_028731	D12Ertd551e	DNA segment, Chr 12, ERATO Doi 551, expressed	0	0	1	1	0	0	0	1	0	1	0
mmu-miR-495	MIMAT0003456	NM_028748	Paqr5	progestin and adipoQ receptor family member V	0	0	1	1	0	0	0	1	0	1	0
mmu-miR-495	MIMAT0003456	NM_028756	Slc35a5	solute carrier family 35, member A5	0	0	1	1	0	0	0	1	0	1	0
mmu-miR-495	MIMAT0003456	NM_028758	Gga2	golgi associated, gamma adaptin ear containing, ARF binding protein 2	0	0	1	1	0	0	0	1	0	1	0
mmu-miR-495	MIMAT0003456	NM_028760	Cep55	centrosomal protein 55	0	0	1	1	0	0	0	1	0	1	0
mmu-miR-495	MIMAT0003456	NM_028774	Rnf6	ring finger protein (C3H2C3 type) 6	0	0	1	1	0	0	0	1	0	1	0
mmu-miR-495	MIMAT0003456	NM_028792	Josd1	Josephin domain containing 1	0	0	1	1	0	0	0	1	0	1	0
mmu-miR-495	MIMAT0003456	NM_028813	Vit	vitrin	0	0	1	1	0	0	0	1	0	1	0
mmu-miR-495	MIMAT0003456	NM_028874	Snx19	sorting nexin 19	0	0	1	1	0	0	0	1	0	1	0
mmu-miR-495	MIMAT0003456	NM_028890	4931414P19Rik	RIKEN cDNA 4931414P19 gene	0	0	1	1	0	0	0	1	0	1	0
mmu-miR-495	MIMAT0003456	NM_028894	Lonrf3	LON peptidase N-terminal domain and ring finger 3	0	0	1	1	0	0	0	1	0	1	0
mmu-miR-495	MIMAT0003456	NM_028906	Dpp8	dipeptidylpeptidase 8	0	0	1	1	0	0	0	1	0	1	0
mmu-miR-495	MIMAT0003456	NM_028922	Ppapdc2	phosphatidic acid phosphatase type 2 domain containing 2	0	0	1	1	0	0	0	1	0	1	0
mmu-miR-495	MIMAT0003456	NM_028965	Snx11	sorting nexin 11	0	0	1	1	0	0	0	1	0	1	0
mmu-miR-495	MIMAT0003456	NM_029330	Fpgt	fucose-1-phosphate guanylyltransferase	0	0	1	1	0	0	0	1	0	1	0
mmu-miR-495	MIMAT0003456	NM_029402	Cul2	cullin 2	0	0	1	1	0	0	0	1	0	1	0
mmu-miR-495	MIMAT0003456	NM_029409	Mff	mitochondrial fission factor	0	0	1	1	0	0	0	1	0	1	0
mmu-miR-495	MIMAT0003456	NM_029436	Klhl24	kelch-like 24 (Drosophila)	0	0	1	1	0	0	0	1	0	1	0
mmu-miR-495	MIMAT0003456	NM_029466	Arl5b	ADP-ribosylation factor-like 5B	0	0	1	1	0	0	0	1	0	1	0
mmu-miR-495	MIMAT0003456	NM_029519	Rap2a	RAS related protein 2a	0	0	1	1	0	0	0	1	0	1	0
mmu-miR-495	MIMAT0003456	NM_029529	Slc35d3	solute carrier family 35, member D3	0	0	1	1	0	0	0	1	0	1	0
mmu-miR-495	MIMAT0003456	NM_029705	Atxn3	ataxin 3	0	0	1	1	0	0	0	1	0	1	0
mmu-miR-495	MIMAT0003456	NM_029752	Bri3bp	Bri3 binding protein	0	0	1	1	0	0	0	1	0	1	0
mmu-miR-495	MIMAT0003456	NM_029758	D12Ertd553e	DNA segment, Chr 12, ERATO Doi 553, expressed	0	0	1	1	0	0	0	1	0	1	0
mmu-miR-495	MIMAT0003456	NM_029848	Hyal4	hyaluronoglucosaminidase 4	0	0	1	1	0	0	0	1	0	1	0
mmu-miR-495	MIMAT0003456	NM_029851	Dync2h1	dynein cytoplasmic 2 heavy chain 1	0	0	1	1	0	0	0	1	0	1	0
mmu-miR-495	MIMAT0003456	NM_029891	Nkrf	NF-kappaB repressing factor	0	0	1	1	0	0	0	1	0	1	0
mmu-miR-495	MIMAT0003456	NM_029931	Mllt3	myeloid/lymphoid or mixed-lineage leukemia (trithorax homolog, Drosophila); translocated to, 3	0	0	1	1	0	0	0	1	0	1	0
mmu-miR-495	MIMAT0003456	NM_029934	Mboat7	membrane bound O-acyltransferase domain containing 7	0	0	1	1	0	0	0	1	0	1	0
mmu-miR-495	MIMAT0003456	NM_029965	Rnf170	ring finger protein 170	0	0	1	1	0	0	0	1	0	1	0
mmu-miR-495	MIMAT0003456	NM_029979	Trim35	tripartite motif-containing 35	0	0	1	1	0	0	0	1	0	1	0
mmu-miR-495	MIMAT0003456	NM_029984	A930021C24Rik	RIKEN cDNA A930021C24 gene	0	0	1	1	0	0	0	1	0	1	0
mmu-miR-495	MIMAT0003456	NM_029998	6030458C11Rik	RIKEN cDNA 6030458C11 gene	0	0	1	1	0	0	0	1	0	1	0
mmu-miR-495	MIMAT0003456	NM_029999	Lbh	limb-bud and heart	0	0	1	1	0	0	0	1	0	1	0
mmu-miR-495	MIMAT0003456	NM_030021	D730039F16Rik	RIKEN cDNA D730039F16 gene	0	0	1	1	0	0	0	1	0	1	0
mmu-miR-495	MIMAT0003456	NM_030025	Ccdc150	coiled-coil domain containing 150	0	0	1	1	0	0	0	1	0	1	0
mmu-miR-495	MIMAT0003456	NM_030121	Asb8	ankyrin repeat and SOCS box-containing protein 8	0	0	1	1	0	0	0	1	0	1	0
mmu-miR-495	MIMAT0003456	NM_030145	Lsm6	LSM6 homolog, U6 small nuclear RNA associated (S. cerevisiae)	0	0	1	1	0	0	0	1	0	1	0
mmu-miR-495	MIMAT0003456	NM_030168	4921505C17Rik	RIKEN cDNA 4921505C17 gene	0	0	1	1	0	0	0	1	0	1	0
mmu-miR-495	MIMAT0003456	NM_030180	Usp54	ubiquitin specific peptidase 54	0	0	1	1	0	0	0	1	0	1	0
mmu-miR-495	MIMAT0003456	NM_030201	Stch	stress 70 protein chaperone, microsome-associated, human homolog	0	0	1	1	0	0	0	1	0	1	0
mmu-miR-495	MIMAT0003456	NM_030257	Lysmd3	LysM, putative peptidoglycan-binding, domain containing 3	0	0	1	1	0	0	0	1	0	1	0
mmu-miR-495	MIMAT0003456	NM_030261	Sesn3	sestrin 3	0	0	1	1	0	0	0	1	0	1	0
mmu-miR-495	MIMAT0003456	NM_030557	Mynn	myoneurin	0	0	1	1	0	0	0	1	0	1	0
mmu-miR-495	MIMAT0003456	NM_030680	Upf1	UPF1 regulator of nonsense transcripts homolog (yeast)	0	0	1	1	0	0	0	1	0	1	0
mmu-miR-495	MIMAT0003456	NM_030706	Trim2	tripartite motif-containing 2	0	0	1	1	0	0	0	1	0	1	0
mmu-miR-495	MIMAT0003456	NM_030708	Zfhx4	zinc finger homeodomain 4	0	0	1	1	0	0	0	1	0	1	0
mmu-miR-495	MIMAT0003456	NM_030732	Tbl1xr1	transducin (beta)-like 1X-linked receptor 1	0	0	1	1	0	0	0	1	0	1	0
mmu-miR-495	MIMAT0003456	NM_031162	Cd247	CD247 antigen	0	0	1	1	0	0	0	1	0	1	0
mmu-miR-495	MIMAT0003456	NM_031179	Sf3b1	splicing factor 3b, subunit 1	0	0	1	1	0	0	0	1	0	1	0
mmu-miR-495	MIMAT0003456	NM_031390	Pramel3	preferentially expressed antigen in melanoma-like 3	0	0	1	1	0	0	0	1	0	1	0
mmu-miR-495	MIMAT0003456	NM_033077	D1Pas1	DNA segment, Chr 1, Pasteur Institute 1	0	0	1	1	0	0	0	1	0	1	0
mmu-miR-495	MIMAT0003456	NM_033320	Glce	glucuronyl C5-epimerase	0	0	1	1	0	0	0	1	0	1	0
mmu-miR-495	MIMAT0003456	NM_033509	Vangl2	vang-like 2 (van gogh, Drosophila)	0	0	1	1	0	0	0	1	0	1	0
mmu-miR-495	MIMAT0003456	NM_033560	Vps37a	vacuolar protein sorting 37A (yeast)	0	0	1	1	0	0	0	1	0	1	0
mmu-miR-495	MIMAT0003456	NM_033565	Aff4	AF4/FMR2 family, member 4	0	0	1	1	0	0	0	1	0	1	0
mmu-miR-495	MIMAT0003456	NM_033602	Peli2	pellino 2	0	0	1	1	0	0	0	1	0	1	0
mmu-miR-495	MIMAT0003456	NM_033618	Supt16h	suppressor of Ty 16 homolog (S. cerevisiae)	0	0	1	1	0	0	0	1	0	1	0
mmu-miR-495	MIMAT0003456	NM_033622	Tnfsf13b	tumor necrosis factor (ligand) superfamily, member 13b	0	0	1	1	0	0	0	1	0	1	0
mmu-miR-495	MIMAT0003456	NM_033623	Dcun1d1	DCN1, defective in cullin neddylation 1, domain containing 1 (S. cerevisiae)	0	0	1	1	0	0	0	1	0	1	0
mmu-miR-495	MIMAT0003456	NM_052994	Spock2	sparc/osteonectin, cwcv and kazal-like domains proteoglycan 2	0	0	1	1	0	0	0	1	0	1	0
mmu-miR-495	MIMAT0003456	NM_053074	Nup62	nucleoporin 62	0	0	1	1	0	0	0	1	0	1	0
mmu-miR-495	MIMAT0003456	NM_053075	Rheb	RAS-homolog enriched in brain	0	0	1	1	0	0	0	1	0	1	0
mmu-miR-495	MIMAT0003456	NM_053076	Rtn3	reticulon 3	0	0	1	1	0	0	0	1	0	1	0
mmu-miR-495	MIMAT0003456	NM_053079	Slc15a1	solute carrier family 15 (oligopeptide transporter), member 1	0	0	1	1	0	0	0	1	0	1	0
mmu-miR-495	MIMAT0003456	NM_053084	Trim32	tripartite motif-containing 32	0	0	1	1	0	0	0	1	0	1	0
mmu-miR-495	MIMAT0003456	NM_053103	Entpd7	ectonucleoside triphosphate diphosphohydrolase 7	0	0	1	1	0	0	0	1	0	1	0
mmu-miR-495	MIMAT0003456	NM_053141	Pcdhb16	protocadherin beta 16	0	0	1	1	0	0	0	1	0	1	0
mmu-miR-495	MIMAT0003456	NM_053144	Pcdhb19	protocadherin beta 19	0	0	1	1	0	0	0	1	0	1	0
mmu-miR-495	MIMAT0003456	NM_053147	Pcdhb22	protocadherin beta 22	0	0	1	1	0	0	0	1	0	1	0
mmu-miR-495	MIMAT0003456	NM_053155	Clmn	calmin	0	0	1	1	0	0	0	1	0	1	0
mmu-miR-495	MIMAT0003456	NM_053186	Cnnm3	cyclin M3	0	0	1	1	0	0	0	1	0	1	0
mmu-miR-495	MIMAT0003456	NM_053197	Sfxn3	sideroflexin 3	0	0	1	1	0	0	0	1	0	1	0
mmu-miR-495	MIMAT0003456	NM_053242	Foxp2	forkhead box P2	0	0	1	1	0	0	0	1	0	1	0
mmu-miR-495	MIMAT0003456	NM_053260	Prss29	protease, serine, 29	0	0	1	1	0	0	0	1	0	1	0
mmu-miR-495	MIMAT0003456	NM_053269	Rad51c	Rad51 homolog c (S. cerevisiae)	0	0	1	1	0	0	0	1	0	1	0
mmu-miR-495	MIMAT0003456	NM_054040	Tulp4	tubby like protein 4	0	0	1	1	0	0	0	1	0	1	0
mmu-miR-495	MIMAT0003456	NM_054043	Msi2	Musashi homolog 2 (Drosophila)	0	0	1	1	0	0	0	1	0	1	0
mmu-miR-495	MIMAT0003456	NM_054051	Pip4k2b	phosphatidylinositol-5-phosphate 4-kinase, type II, beta	0	0	1	1	0	0	0	1	0	1	0
mmu-miR-495	MIMAT0003456	NM_054052	B3gnt5	UDP-GlcNAc:betaGal beta-1,3-N-acetylglucosaminyltransferase 5	0	0	1	1	0	0	0	1	0	1	0
mmu-miR-495	MIMAT0003456	NM_054054	Brdt	bromodomain, testis-specific	0	0	1	1	0	0	0	1	0	1	0
mmu-miR-495	MIMAT0003456	NM_057172	Fubp1	far upstream element (FUSE) binding protein 1	0	0	1	1	0	0	0	1	0	1	0
mmu-miR-495	MIMAT0003456	NM_080464	Ppp1r3a	protein phosphatase 1, regulatory (inhibitor) subunit 3A	0	0	1	1	0	0	0	1	0	1	0
mmu-miR-495	MIMAT0003456	NM_080843	Socs4	suppressor of cytokine signaling 4	0	0	1	1	0	0	0	1	0	1	0
mmu-miR-495	MIMAT0003456	NM_130447	Dusp16	dual specificity phosphatase 16	0	0	1	1	0	0	0	1	0	1	0
mmu-miR-495	MIMAT0003456	NM_133218	Zfp704	zinc finger protein 704	0	0	1	1	0	0	0	1	0	1	0
mmu-miR-495	MIMAT0003456	NM_133221	Slc24a6	solute carrier family 24 (sodium/potassium/calcium exchanger), member 6	0	0	1	1	0	0	0	1	0	1	0
mmu-miR-495	MIMAT0003456	NM_133225	Acbd3	acyl-Coenzyme A binding domain containing 3	0	0	1	1	0	0	0	1	0	1	0
mmu-miR-495	MIMAT0003456	NM_133235	Khdrbs2	KH domain containing, RNA binding, signal transduction associated 2	0	0	1	1	0	0	0	1	0	1	0
mmu-miR-495	MIMAT0003456	NM_133236	Glcci1	glucocorticoid induced transcript 1	0	0	1	1	0	0	0	1	0	1	0
mmu-miR-495	MIMAT0003456	NM_133668	Slc25a3	solute carrier family 25 (mitochondrial carrier, phosphate carrier), member 3	0	0	1	1	0	0	0	1	0	1	0
mmu-miR-495	MIMAT0003456	NM_133680	Hiatl1	hippocampus abundant transcript-like 1	0	0	1	1	0	0	0	1	0	1	0
mmu-miR-495	MIMAT0003456	NM_133719	Metrn	meteorin, glial cell differentiation regulator	0	0	1	1	0	0	0	1	0	1	0
mmu-miR-495	MIMAT0003456	NM_133784	Wwtr1	WW domain containing transcription regulator 1	0	0	1	1	0	0	0	1	0	1	0
mmu-miR-495	MIMAT0003456	NM_133791	Wwc2	WW, C2 and coiled-coil domain containing 2	0	0	1	1	0	0	0	1	0	1	0
mmu-miR-495	MIMAT0003456	NM_133828	Creb1	cAMP responsive element binding protein 1	0	0	1	1	0	0	0	1	0	1	0
mmu-miR-495	MIMAT0003456	NM_133865	Dclre1b	DNA cross-link repair 1B, PSO2 homolog (S. cerevisiae)	0	0	1	1	0	0	0	1	0	1	0
mmu-miR-495	MIMAT0003456	NM_133872	Aof2	amine oxidase (flavin containing) domain 2	0	0	1	1	0	0	0	1	0	1	0
mmu-miR-495	MIMAT0003456	NM_133927	Itfg2	integrin alpha FG-GAP repeat containing 2	0	0	1	1	0	0	0	1	0	1	0
mmu-miR-495	MIMAT0003456	NM_133931	Pot1a	protection of telomeres 1A	0	0	1	1	0	0	0	1	0	1	0
mmu-miR-495	MIMAT0003456	NM_133940	Fbxl14	F-box and leucine-rich repeat protein 14	0	0	1	1	0	0	0	1	0	1	0
mmu-miR-495	MIMAT0003456	NM_133957	Nfat5	nuclear factor of activated T-cells 5	0	0	1	1	0	0	0	1	0	1	0
mmu-miR-495	MIMAT0003456	NM_133975	Trip12	thyroid hormone receptor interactor 12	0	0	1	1	0	0	0	1	0	1	0
mmu-miR-495	MIMAT0003456	NM_133996	Apon	apolipoprotein N	0	0	1	1	0	0	0	1	0	1	0
mmu-miR-495	MIMAT0003456	NM_134010	Nup107	nucleoporin 107	0	0	1	1	0	0	0	1	0	1	0
mmu-miR-495	MIMAT0003456	NM_134015	Fbxw11	F-box and WD-40 domain protein 11	0	0	1	1	0	0	0	1	0	1	0
mmu-miR-495	MIMAT0003456	NM_134064	Rnf44	ring finger protein 44	0	0	1	1	0	0	0	1	0	1	0
mmu-miR-495	MIMAT0003456	NM_134071	Ankrd32	ankyrin repeat domain 32	0	0	1	1	0	0	0	1	0	1	0
mmu-miR-495	MIMAT0003456	NM_134094	Ncald	neurocalcin delta	0	0	1	1	0	0	0	1	0	1	0
mmu-miR-495	MIMAT0003456	NM_134126	Ift140	intraflagellar transport 140 homolog (Chlamydomonas)	0	0	1	1	0	0	0	1	0	1	0
mmu-miR-495	MIMAT0003456	NM_134138	Psmg2	proteasome (prosome, macropain) assembly chaperone 2	0	0	1	1	0	0	0	1	0	1	0
mmu-miR-495	MIMAT0003456	NM_138589	Ubfd1	ubiquitin family domain containing 1	0	0	1	1	0	0	0	1	0	1	0
mmu-miR-495	MIMAT0003456	NM_138651	Cds2	CDP-diacylglycerol synthase (phosphatidate cytidylyltransferase) 2	0	0	1	1	0	0	0	1	0	1	0
mmu-miR-495	MIMAT0003456	NM_138660	Casc3	cancer susceptibility candidate 3	0	0	1	1	0	0	0	1	0	1	0
mmu-miR-495	MIMAT0003456	NM_138666	Nlgn1	neuroligin 1	0	0	1	1	0	0	0	1	0	1	0
mmu-miR-495	MIMAT0003456	NM_138953	Ell2	elongation factor RNA polymerase II 2	0	0	1	1	0	0	0	1	0	1	0
mmu-miR-495	MIMAT0003456	NM_139141	Zfp192	zinc finger protein 192	0	0	1	1	0	0	0	1	0	1	0
mmu-miR-495	MIMAT0003456	NM_139144	Ogt	O-linked N-acetylglucosamine (GlcNAc) transferase (UDP-N-acetylglucosamine:polypeptide-N-acetylglucosaminyl transferase)	0	0	1	1	0	0	0	1	0	1	0
mmu-miR-495	MIMAT0003456	NM_139200	Pscdbp	pleckstrin homology, Sec7 and coiled-coil domains, binding protein	0	0	1	1	0	0	0	1	0	1	0
mmu-miR-495	MIMAT0003456	NM_139226	Onecut3	one cut domain, family member 3	0	0	1	1	0	0	0	1	0	1	0
mmu-miR-495	MIMAT0003456	NM_139294	Braf	Braf transforming gene	0	0	1	1	0	0	0	1	0	1	0
mmu-miR-495	MIMAT0003456	NM_144535	4932432K03Rik	RIKEN cDNA 4932432K03 gene	0	0	1	1	0	0	0	1	0	1	0
mmu-miR-495	MIMAT0003456	NM_144552	Stxbp6	syntaxin binding protein 6 (amisyn)	0	0	1	1	0	0	0	1	0	1	0
mmu-miR-495	MIMAT0003456	NM_144559	Fcgr4	Fc receptor, IgG, low affinity IV	0	0	1	1	0	0	0	1	0	1	0
mmu-miR-495	MIMAT0003456	NM_144792	Sgms1	sphingomyelin synthase 1	0	0	1	1	0	0	0	1	0	1	0
mmu-miR-495	MIMAT0003456	NM_144795	Pycr1	pyrroline-5-carboxylate reductase 1	0	0	1	1	0	0	0	1	0	1	0
mmu-miR-495	MIMAT0003456	NM_144802	Hnrpll	heterogeneous nuclear ribonucleoprotein L-like	0	0	1	1	0	0	0	1	0	1	0
mmu-miR-495	MIMAT0003456	NM_144812	Tnrc6b	trinucleotide repeat containing 6b	0	0	1	1	0	0	0	1	0	1	0
mmu-miR-495	MIMAT0003456	NM_144825	Taok1	TAO kinase 1	0	0	1	1	0	0	0	1	0	1	0
mmu-miR-495	MIMAT0003456	NM_144859	Pja2	praja 2, RING-H2 motif containing	0	0	1	1	0	0	0	1	0	1	0
mmu-miR-495	MIMAT0003456	NM_144861	BC021395	cDNA sequence BC021395	0	0	1	1	0	0	0	1	0	1	0
mmu-miR-495	MIMAT0003456	NM_144866	Etf1	eukaryotic translation termination factor 1	0	0	1	1	0	0	0	1	0	1	0
mmu-miR-495	MIMAT0003456	NM_144874	Cox15	COX15 homolog, cytochrome c oxidase assembly protein (yeast)	0	0	1	1	0	0	0	1	0	1	0
mmu-miR-495	MIMAT0003456	NM_144925	Tnrc6a	trinucleotide repeat containing 6a	0	0	1	1	0	0	0	1	0	1	0
mmu-miR-495	MIMAT0003456	NM_145125	Brwd1	bromodomain and WD repeat domain containing 1	0	0	1	1	0	0	0	1	0	1	0
mmu-miR-495	MIMAT0003456	NM_145136	Myocd	myocardin	0	0	1	1	0	0	0	1	0	1	0
mmu-miR-495	MIMAT0003456	NM_145151	Crebzf	CREB/ATF bZIP transcription factor	0	0	1	1	0	0	0	1	0	1	0
mmu-miR-495	MIMAT0003456	NM_145371	Eif2b1	eukaryotic translation initiation factor 2B, subunit 1 (alpha)	0	0	1	1	0	0	0	1	0	1	0
mmu-miR-495	MIMAT0003456	NM_145457	Paip1	polyadenylate binding protein-interacting protein 1	0	0	1	1	0	0	0	1	0	1	0
mmu-miR-495	MIMAT0003456	NM_145463	Shisa2	shisa homolog 2 (Xenopus laevis)	0	0	1	1	0	0	0	1	0	1	0
mmu-miR-495	MIMAT0003456	NM_145491	Rhoq	ras homolog gene family, member Q	0	0	1	1	0	0	0	1	0	1	0
mmu-miR-495	MIMAT0003456	NM_145556	Tardbp	TAR DNA binding protein	0	0	1	1	0	0	0	1	0	1	0
mmu-miR-495	MIMAT0003456	NM_145585	Thumpd1	THUMP domain containing 1	0	0	1	1	0	0	0	1	0	1	0
mmu-miR-495	MIMAT0003456	NM_145608	BC021891	cDNA sequence BC021891	0	0	1	1	0	0	0	1	0	1	0
mmu-miR-495	MIMAT0003456	NM_145711	Tox	thymocyte selection-associated high mobility group box	0	0	1	1	0	0	0	1	0	1	0
mmu-miR-495	MIMAT0003456	NM_145826	Il17re	interleukin 17 receptor E	0	0	1	1	0	0	0	1	0	1	0
mmu-miR-495	MIMAT0003456	NM_145827	Nlrp3	NLR family, pyrin domain containing 3	0	0	1	1	0	0	0	1	0	1	0
mmu-miR-495	MIMAT0003456	NM_145907	Porcn	porcupine homolog (Drosophila)	0	0	1	1	0	0	0	1	0	1	0
mmu-miR-495	MIMAT0003456	NM_145938	Rpp40	ribonuclease P 40 subunit (human)	0	0	1	1	0	0	0	1	0	1	0
mmu-miR-495	MIMAT0003456	NM_145958	Kbtbd2	kelch repeat and BTB (POZ) domain containing 2	0	0	1	1	0	0	0	1	0	1	0
mmu-miR-495	MIMAT0003456	NM_145962	Pank3	pantothenate kinase 3	0	0	1	1	0	0	0	1	0	1	0
mmu-miR-495	MIMAT0003456	NM_146018	Flcn	folliculin	0	0	1	1	0	0	0	1	0	1	0
mmu-miR-495	MIMAT0003456	NM_146051	3830406C13Rik	RIKEN cDNA 3830406C13 gene	0	0	1	1	0	0	0	1	0	1	0
mmu-miR-495	MIMAT0003456	NM_146062	Pphln1	periphilin 1	0	0	1	1	0	0	0	1	0	1	0
mmu-miR-495	MIMAT0003456	NM_146083	Sfrs7	splicing factor, arginine/serine-rich 7	0	0	1	1	0	0	0	1	0	1	0
mmu-miR-495	MIMAT0003456	NM_146085	Apbb3	amyloid beta (A4) precursor protein-binding, family B, member 3	0	0	1	1	0	0	0	1	0	1	0
mmu-miR-495	MIMAT0003456	NM_146095	Rorb	RAR-related orphan receptor beta	0	0	1	1	0	0	0	1	0	1	0
mmu-miR-495	MIMAT0003456	NM_146121	Rabgap1	RAB GTPase activating protein 1	0	0	1	1	0	0	0	1	0	1	0
mmu-miR-495	MIMAT0003456	NM_146148	C8a	complement component 8, alpha polypeptide	0	0	1	1	0	0	0	1	0	1	0
mmu-miR-495	MIMAT0003456	NM_146207	Cul4a	cullin 4A	0	0	1	1	0	0	0	1	0	1	0
mmu-miR-495	MIMAT0003456	NM_146339	Olfr77	olfactory receptor 77	0	0	1	1	0	0	0	1	0	1	0
mmu-miR-495	MIMAT0003456	NM_146386	Myocd	myocardin	0	0	1	1	0	0	0	1	0	1	0
mmu-miR-495	MIMAT0003456	NM_148926	Zfand3	zinc finger, AN1-type domain 3	0	0	1	1	0	0	0	1	0	1	0
mmu-miR-495	MIMAT0003456	NM_148944	Chrnb4	cholinergic receptor, nicotinic, beta polypeptide 4	0	0	1	1	0	0	0	1	0	1	0
mmu-miR-495	MIMAT0003456	NM_148948	Dicer1	Dicer1, Dcr-1 homolog (Drosophila)	0	0	1	1	0	0	0	1	0	1	0
mmu-miR-495	MIMAT0003456	NM_152915	Dner	delta/notch-like EGF-related receptor	0	0	1	1	0	0	0	1	0	1	0
mmu-miR-495	MIMAT0003456	NM_153078	Ehbp1	EH domain binding protein 1	0	0	1	1	0	0	0	1	0	1	0
mmu-miR-495	MIMAT0003456	NM_153080	Tom1l2	target of myb1-like 2 (chicken)	0	0	1	1	0	0	0	1	0	1	0
mmu-miR-495	MIMAT0003456	NM_153086	Gjd4	gap junction protein, delta 4	0	0	1	1	0	0	0	1	0	1	0
mmu-miR-495	MIMAT0003456	NM_153145	Abca8a	ATP-binding cassette, sub-family A (ABC1), member 8a	0	0	1	1	0	0	0	1	0	1	0
mmu-miR-495	MIMAT0003456	NM_153163	Cadps2	Ca2+-dependent activator protein for secretion 2	0	0	1	1	0	0	0	1	0	1	0
mmu-miR-495	MIMAT0003456	NM_153165	Klhl15	kelch-like 15 (Drosophila)	0	0	1	1	0	0	0	1	0	1	0
mmu-miR-495	MIMAT0003456	NM_153390	Pxt1	peroxisomal, testis specific 1	0	0	1	1	0	0	0	1	0	1	0
mmu-miR-495	MIMAT0003456	NM_153412	Phldb2	pleckstrin homology-like domain, family B, member 2	0	0	1	1	0	0	0	1	0	1	0
mmu-miR-495	MIMAT0003456	NM_153516	Bcl2l13	BCL2-like 13 (apoptosis facilitator)	0	0	1	1	0	0	0	1	0	1	0
mmu-miR-495	MIMAT0003456	NM_153526	Insig1	insulin induced gene 1	0	0	1	1	0	0	0	1	0	1	0
mmu-miR-495	MIMAT0003456	NM_153532	Zfp280c	zinc finger protein 280c	0	0	1	1	0	0	0	1	0	1	0
mmu-miR-495	MIMAT0003456	NM_153570	Noc4l	nucleolar complex associated 4 homolog (S. cerevisiae)	0	0	1	1	0	0	0	1	0	1	0
mmu-miR-495	MIMAT0003456	NM_153592	Erlin2	ER lipid raft associated 2	0	0	1	1	0	0	0	1	0	1	0
mmu-miR-495	MIMAT0003456	NM_153599	Cdk8	cyclin-dependent kinase 8	0	0	1	1	0	0	0	1	0	1	0
mmu-miR-495	MIMAT0003456	NM_153743	Dnmt3a	DNA methyltransferase 3A	0	0	1	1	0	0	0	1	0	1	0
mmu-miR-495	MIMAT0003456	NM_153796	Peo1	progressive external ophthalmoplegia 1 (human)	0	0	1	1	0	0	0	1	0	1	0
mmu-miR-495	MIMAT0003456	NM_153807	Acsf2	acyl-CoA synthetase family member 2	0	0	1	1	0	0	0	1	0	1	0
mmu-miR-495	MIMAT0003456	NM_171826	Cldnd1	claudin domain containing 1	0	0	1	1	0	0	0	1	0	1	0
mmu-miR-495	MIMAT0003456	NM_172049	Tmem18	transmembrane protein 18	0	0	1	1	0	0	0	1	0	1	0
mmu-miR-495	MIMAT0003456	NM_172284	Ddx19b	DEAD (Asp-Glu-Ala-Asp) box polypeptide 19b	0	0	1	1	0	0	0	1	0	1	0
mmu-miR-495	MIMAT0003456	NM_172303	Phf17	PHD finger protein 17	0	0	1	1	0	0	0	1	0	1	0
mmu-miR-495	MIMAT0003456	NM_172307	Mbtps2	membrane-bound transcription factor peptidase, site 2	0	0	1	1	0	0	0	1	0	1	0
mmu-miR-495	MIMAT0003456	NM_172402	Slc25a32	solute carrier family 25, member 32	0	0	1	1	0	0	0	1	0	1	0
mmu-miR-495	MIMAT0003456	NM_172409	Fmnl2	formin-like 2	0	0	1	1	0	0	0	1	0	1	0
mmu-miR-495	MIMAT0003456	NM_172426	Slc24a2	solute carrier family 24 (sodium/potassium/calcium exchanger), member 2	0	0	1	1	0	0	0	1	0	1	0
mmu-miR-495	MIMAT0003456	NM_172437	Pus7l	pseudouridylate synthase 7 homolog (S. cerevisiae)-like	0	0	1	1	0	0	0	1	0	1	0
mmu-miR-495	MIMAT0003456	NM_172441	Shroom2	shroom family member 2	0	0	1	1	0	0	0	1	0	1	0
mmu-miR-495	MIMAT0003456	NM_172450	4930539E08Rik	RIKEN cDNA 4930539E08 gene	0	0	1	1	0	0	0	1	0	1	0
mmu-miR-495	MIMAT0003456	NM_172480	Mtrr	5-methyltetrahydrofolate-homocysteine methyltransferase reductase	0	0	1	1	0	0	0	1	0	1	0
mmu-miR-495	MIMAT0003456	NM_172488	9030625A04Rik	RIKEN cDNA 9030625A04 gene	0	0	1	1	0	0	0	1	0	1	0
mmu-miR-495	MIMAT0003456	NM_172495	Ncoa7	nuclear receptor coactivator 7	0	0	1	1	0	0	0	1	0	1	0
mmu-miR-495	MIMAT0003456	NM_172506	Boc	biregional cell adhesion molecule-related/down-regulated by oncogenes (Cdon) binding protein	0	0	1	1	0	0	0	1	0	1	0
mmu-miR-495	MIMAT0003456	NM_172507	Sh3bgrl2	SH3 domain binding glutamic acid-rich protein like 2	0	0	1	1	0	0	0	1	0	1	0
mmu-miR-495	MIMAT0003456	NM_172513	D1Ertd53e	DNA segment, Chr 1, ERATO Doi 53, expressed	0	0	1	1	0	0	0	1	0	1	0
mmu-miR-495	MIMAT0003456	NM_172516	Ripk5	receptor interacting protein kinase 5	0	0	1	1	0	0	0	1	0	1	0
mmu-miR-495	MIMAT0003456	NM_172525	Arhgap29	Rho GTPase activating protein 29	0	0	1	1	0	0	0	1	0	1	0
mmu-miR-495	MIMAT0003456	NM_172543	5730593F17Rik	RIKEN cDNA 5730593F17 gene	0	0	1	1	0	0	0	1	0	1	0
mmu-miR-495	MIMAT0003456	NM_172544	Nrxn3	neurexin III	0	0	1	1	0	0	0	1	0	1	0
mmu-miR-495	MIMAT0003456	NM_172545	Ehmt1	euchromatic histone methyltransferase 1	0	0	1	1	0	0	0	1	0	1	0
mmu-miR-495	MIMAT0003456	NM_172555	Papolg	poly(A) polymerase gamma	0	0	1	1	0	0	0	1	0	1	0
mmu-miR-495	MIMAT0003456	NM_172563	Hlf	hepatic leukemia factor	0	0	1	1	0	0	0	1	0	1	0
mmu-miR-495	MIMAT0003456	NM_172588	Serinc5	serine incorporator 5	0	0	1	1	0	0	0	1	0	1	0
mmu-miR-495	MIMAT0003456	NM_172635	Patl1	protein associated with topoisomerase II homolog 1 (yeast)	0	0	1	1	0	0	0	1	0	1	0
mmu-miR-495	MIMAT0003456	NM_172643	Zbtb41	zinc finger and BTB domain containing 41 homolog	0	0	1	1	0	0	0	1	0	1	0
mmu-miR-495	MIMAT0003456	NM_172663	Epc2	enhancer of polycomb homolog 2 (Drosophila)	0	0	1	1	0	0	0	1	0	1	0
mmu-miR-495	MIMAT0003456	NM_172666	Agps	alkylglycerone phosphate synthase	0	0	1	1	0	0	0	1	0	1	0
mmu-miR-495	MIMAT0003456	NM_172675	Stx16	syntaxin 16	0	0	1	1	0	0	0	1	0	1	0
mmu-miR-495	MIMAT0003456	NM_172683	Pogz	pogo transposable element with ZNF domain	0	0	1	1	0	0	0	1	0	1	0
mmu-miR-495	MIMAT0003456	NM_172684	Rsbn1	rosbin, round spermatid basic protein 1	0	0	1	1	0	0	0	1	0	1	0
mmu-miR-495	MIMAT0003456	NM_172695	Plaa	phospholipase A2, activating protein	0	0	1	1	0	0	0	1	0	1	0
mmu-miR-495	MIMAT0003456	NM_172698	4732418C07Rik	RIKEN cDNA 4732418C07 gene	0	0	1	1	0	0	0	1	0	1	0
mmu-miR-495	MIMAT0003456	NM_172707	Ppp1cb	protein phosphatase 1, catalytic subunit, beta isoform	0	0	1	1	0	0	0	1	0	1	0
mmu-miR-495	MIMAT0003456	NM_172712	Uba6	ubiquitin-like modifier activating enzyme 6	0	0	1	1	0	0	0	1	0	1	0
mmu-miR-495	MIMAT0003456	NM_172715	Agpat9	1-acylglycerol-3-phosphate O-acyltransferase 9	0	0	1	1	0	0	0	1	0	1	0
mmu-miR-495	MIMAT0003456	NM_172734	Stk38l	serine/threonine kinase 38 like	0	0	1	1	0	0	0	1	0	1	0
mmu-miR-495	MIMAT0003456	NM_172752	Sorbs2	sorbin and SH3 domain containing 2	0	0	1	1	0	0	0	1	0	1	0
mmu-miR-495	MIMAT0003456	NM_172765	Zbtb44	zinc finger and BTB domain containing 44	0	0	1	1	0	0	0	1	0	1	0
mmu-miR-495	MIMAT0003456	NM_172770	Ttc12	tetratricopeptide repeat domain 12	0	0	1	1	0	0	0	1	0	1	0
mmu-miR-495	MIMAT0003456	NM_172827	Lnpep	leucyl/cystinyl aminopeptidase	0	0	1	1	0	0	0	1	0	1	0
mmu-miR-495	MIMAT0003456	NM_172832	Pcyox1l	prenylcysteine oxidase 1 like	0	0	1	1	0	0	0	1	0	1	0
mmu-miR-495	MIMAT0003456	NM_172843	Tor1aip2	torsin A interacting protein 2	0	0	1	1	0	0	0	1	0	1	0
mmu-miR-495	MIMAT0003456	NM_172853	Cdh7	cadherin 7, type 2	0	0	1	1	0	0	0	1	0	1	0
mmu-miR-495	MIMAT0003456	NM_172860	Cbfa2t2	core-binding factor, runt domain, alpha subunit 2, translocated to, 2 (human)	0	0	1	1	0	0	0	1	0	1	0
mmu-miR-495	MIMAT0003456	NM_172865	Manea	mannosidase, endo-alpha	0	0	1	1	0	0	0	1	0	1	0
mmu-miR-495	MIMAT0003456	NM_172867	Zfp462	zinc finger protein 462	0	0	1	1	0	0	0	1	0	1	0
mmu-miR-495	MIMAT0003456	NM_172925	Klhl31	kelch-like 31 (Drosophila)	0	0	1	1	0	0	0	1	0	1	0
mmu-miR-495	MIMAT0003456	NM_172934	Heg1	HEG homolog 1 (zebrafish)	0	0	1	1	0	0	0	1	0	1	0
mmu-miR-495	MIMAT0003456	NM_172946	Krt222	keratin 222	0	0	1	1	0	0	0	1	0	1	0
mmu-miR-495	MIMAT0003456	NM_172964	Arhgap28	Rho GTPase activating protein 28	0	0	1	1	0	0	0	1	0	1	0
mmu-miR-495	MIMAT0003456	NM_172992	Phtf2	putative homeodomain transcription factor 2	0	0	1	1	0	0	0	1	0	1	0
mmu-miR-495	MIMAT0003456	NM_173030	Galnt13	UDP-N-acetyl-alpha-D-galactosamine:polypeptide N-acetylgalactosaminyltransferase 13	0	0	1	1	0	0	0	1	0	1	0
mmu-miR-495	MIMAT0003456	NM_173185	Csnk1g1	casein kinase 1, gamma 1	0	0	1	1	0	0	0	1	0	1	0
mmu-miR-495	MIMAT0003456	NM_173390	Nhsl1	NHS-like 1	0	0	1	1	0	0	0	1	0	1	0
mmu-miR-495	MIMAT0003456	NM_173403	Slc10a4	solute carrier family 10 (sodium/bile acid cotransporter family), member 4	0	0	1	1	0	0	0	1	0	1	0
mmu-miR-495	MIMAT0003456	NM_173421	BC030476	cDNA sequence BC030476	0	0	1	1	0	0	0	1	0	1	0
mmu-miR-495	MIMAT0003456	NM_173424	Zbtb37	zinc finger and BTB domain containing 37	0	0	1	1	0	0	0	1	0	1	0
mmu-miR-495	MIMAT0003456	NM_173431	Rpgrip1l	Rpgrip1-like	0	0	1	1	0	0	0	1	0	1	0
mmu-miR-495	MIMAT0003456	NM_173442	Gcnt1	glucosaminyl (N-acetyl) transferase 1, core 2	0	0	1	1	0	0	0	1	0	1	0
mmu-miR-495	MIMAT0003456	NM_173450	Rpusd2	RNA pseudouridylate synthase domain containing 2	0	0	1	1	0	0	0	1	0	1	0
mmu-miR-495	MIMAT0003456	NM_173731	Hmgcll1	3-hydroxymethyl-3-methylglutaryl-Coenzyme A lyase-like 1	0	0	1	1	0	0	0	1	0	1	0
mmu-miR-495	MIMAT0003456	NM_173745	Dusp18	dual specificity phosphatase 18	0	0	1	1	0	0	0	1	0	1	0
mmu-miR-495	MIMAT0003456	NM_173753	Fnip1	folliculin interacting protein 1	0	0	1	1	0	0	0	1	0	1	0
mmu-miR-495	MIMAT0003456	NM_173781	Rab6b	RAB6B, member RAS oncogene family	0	0	1	1	0	0	0	1	0	1	0
mmu-miR-495	MIMAT0003456	NM_173784	Ubtd2	ubiquitin domain containing 2	0	0	1	1	0	0	0	1	0	1	0
mmu-miR-495	MIMAT0003456	NM_173785	A230051G13Rik	RIKEN cDNA A230051G13 gene	0	0	1	1	0	0	0	1	0	1	0
mmu-miR-495	MIMAT0003456	NM_173876	Clcn3	chloride channel 3	0	0	1	1	0	0	0	1	0	1	0
mmu-miR-495	MIMAT0003456	NM_174851	Il28ra	interleukin 28 receptor alpha	0	0	1	1	0	0	0	1	0	1	0
mmu-miR-495	MIMAT0003456	NM_174996	D4Ertd22e	DNA segment, Chr 4, ERATO Doi 22, expressed	0	0	1	1	0	0	0	1	0	1	0
mmu-miR-495	MIMAT0003456	NM_175003	AU040829	expressed sequence AU040829	0	0	1	1	0	0	0	1	0	1	0
mmu-miR-495	MIMAT0003456	NM_175025	Atp2c1	ATPase, Ca++-sequestering	0	0	1	1	0	0	0	1	0	1	0
mmu-miR-495	MIMAT0003456	NM_175111	Hspbap1	Hspb associated protein 1	0	0	1	1	0	0	0	1	0	1	0
mmu-miR-495	MIMAT0003456	NM_175121	Slc38a2	solute carrier family 38, member 2	0	0	1	1	0	0	0	1	0	1	0
mmu-miR-495	MIMAT0003456	NM_175127	Fbxo28	F-box protein 28	0	0	1	1	0	0	0	1	0	1	0
mmu-miR-495	MIMAT0003456	NM_175146	Tsr2	TSR2, 20S rRNA accumulation, homolog (S. cerevisiae)	0	0	1	1	0	0	0	1	0	1	0
mmu-miR-495	MIMAT0003456	NM_175155	Sash1	SAM and SH3 domain containing 1	0	0	1	1	0	0	0	1	0	1	0
mmu-miR-495	MIMAT0003456	NM_175168	Ptk7	PTK7 protein tyrosine kinase 7	0	0	1	1	0	0	0	1	0	1	0
mmu-miR-495	MIMAT0003456	NM_175170	Pogk	pogo transposable element with KRAB domain	0	0	1	1	0	0	0	1	0	1	0
mmu-miR-495	MIMAT0003456	NM_175175	Plekhf2	pleckstrin homology domain containing, family F (with FYVE domain) member 2	0	0	1	1	0	0	0	1	0	1	0
mmu-miR-495	MIMAT0003456	NM_175184	2610528K11Rik	RIKEN cDNA 2610528K11 gene	0	0	1	1	0	0	0	1	0	1	0
mmu-miR-495	MIMAT0003456	NM_175188	March1	membrane-associated ring finger (C3HC4) 1	0	0	1	1	0	0	0	1	0	1	0
mmu-miR-495	MIMAT0003456	NM_175191	Gpr22	G protein-coupled receptor 22	0	0	1	1	0	0	0	1	0	1	0
mmu-miR-495	MIMAT0003456	NM_175201	Rnf38	ring finger protein 38	0	0	1	1	0	0	0	1	0	1	0
mmu-miR-495	MIMAT0003456	NM_175245	2410129H14Rik	RIKEN cDNA 2410129H14 gene	0	0	1	1	0	0	0	1	0	1	0
mmu-miR-495	MIMAT0003456	NM_175270	Ankrd56	ankyrin repeat domain 56	0	0	1	1	0	0	0	1	0	1	0
mmu-miR-495	MIMAT0003456	NM_175294	Nucks1	nuclear casein kinase and cyclin-dependent kinase substrate 1	0	0	1	1	0	0	0	1	0	1	0
mmu-miR-495	MIMAT0003456	NM_175306	Phactr4	phosphatase and actin regulator 4	0	0	1	1	0	0	0	1	0	1	0
mmu-miR-495	MIMAT0003456	NM_175313	A130022J15Rik	RIKEN cDNA A130022J15 gene	0	0	1	1	0	0	0	1	0	1	0
mmu-miR-495	MIMAT0003456	NM_175341	Mbnl2	muscleblind-like 2	0	0	1	1	0	0	0	1	0	1	0
mmu-miR-495	MIMAT0003456	NM_175425	C1qtnf7	C1q and tumor necrosis factor related protein 7	0	0	1	1	0	0	0	1	0	1	0
mmu-miR-495	MIMAT0003456	NM_175485	Prtg	protogenin homolog (Gallus gallus)	0	0	1	1	0	0	0	1	0	1	0
mmu-miR-495	MIMAT0003456	NM_175489	Osbpl8	oxysterol binding protein-like 8	0	0	1	1	0	0	0	1	0	1	0
mmu-miR-495	MIMAT0003456	NM_178886	Ldlrad3	low density lipoprotein receptor class A domain containing 3	0	0	1	1	0	0	0	1	0	1	0
mmu-miR-495	MIMAT0003456	NM_177820	Apol10b	apolipoprotein L 10b	0	0	1	1	0	0	0	1	0	1	0
mmu-miR-495	MIMAT0003456	NM_177818	C130057D23Rik	RIKEN cDNA C130057D23 gene	0	0	1	1	0	0	0	1	0	1	0
mmu-miR-495	MIMAT0003456	NM_203507	Rwdd4a	RWD domain containing 4A	0	0	1	1	0	0	0	1	0	1	0
mmu-miR-495	MIMAT0003456	NM_181278	B230219D22Rik	RIKEN cDNA B230219D22 gene	0	0	1	1	0	0	0	1	0	1	0
mmu-miR-495	MIMAT0003456	NM_177766	Slc35e1	solute carrier family 35, member E1	0	0	1	1	0	0	0	1	0	1	0
mmu-miR-495	MIMAT0003456	NM_201607	Pde4c	phosphodiesterase 4C, cAMP specific	0	0	1	1	0	0	0	1	0	1	0
mmu-miR-495	MIMAT0003456	NM_177756	Glt25d2	glycosyltransferase 25 domain containing 2	0	0	1	1	0	0	0	1	0	1	0
mmu-miR-495	MIMAT0003456	NM_201519	Map4k5	mitogen-activated protein kinase kinase kinase kinase 5	0	0	1	1	0	0	0	1	0	1	0
mmu-miR-495	MIMAT0003456	NM_178256	Reps2	RALBP1 associated Eps domain containing protein 2	0	0	1	1	0	0	0	1	0	1	0
mmu-miR-495	MIMAT0003456	NM_177857	Dennd2c	DENN/MADD domain containing 2C	0	0	1	1	0	0	0	1	0	1	0
mmu-miR-495	MIMAT0003456	NM_181071	Tanc2	tetratricopeptide repeat, ankyrin repeat and coiled-coil containing 2	0	0	1	1	0	0	0	1	0	1	0
mmu-miR-495	MIMAT0003456	NM_178080	Pde4dip	phosphodiesterase 4D interacting protein (myomegalin)	0	0	1	1	0	0	0	1	0	1	0
mmu-miR-495	MIMAT0003456	NM_178066	1110012D08Rik	RIKEN cDNA 1110012D08 gene	0	0	1	1	0	0	0	1	0	1	0
mmu-miR-495	MIMAT0003456	NM_178065	1110018G07Rik	RIKEN cDNA 1110018G07 gene	0	0	1	1	0	0	0	1	0	1	0
mmu-miR-495	MIMAT0003456	NM_178061	Mobkl2b	MOB1, Mps One Binder kinase activator-like 2B (yeast)	0	0	1	1	0	0	0	1	0	1	0
mmu-miR-495	MIMAT0003456	NM_178896	Dcun1d4	DCN1, defective in cullin neddylation 1, domain containing 4 (S. cerevisiae)	0	0	1	1	0	0	0	1	0	1	0
mmu-miR-495	MIMAT0003456	NM_178899	AI987662	expressed sequence AI987662	0	0	1	1	0	0	0	1	0	1	0
mmu-miR-495	MIMAT0003456	NM_207000	H2afy2	H2A histone family, member Y2	0	0	1	1	0	0	0	1	0	1	0
mmu-miR-495	MIMAT0003456	NM_180974	Foxn2	forkhead box N2	0	0	1	1	0	0	0	1	0	1	0
mmu-miR-495	MIMAT0003456	NM_177894	1700129I04Rik	RIKEN cDNA 1700129I04 gene	0	0	1	1	0	0	0	1	0	1	0
mmu-miR-495	MIMAT0003456	NM_177721	Ranbp6	RAN binding protein 6	0	0	1	1	0	0	0	1	0	1	0
mmu-miR-495	MIMAT0003456	NM_181402	Parp11	poly (ADP-ribose) polymerase family, member 11	0	0	1	1	0	0	0	1	0	1	0
mmu-miR-495	MIMAT0003456	NM_177592	Tmem164	transmembrane protein 164	0	0	1	1	0	0	0	1	0	1	0
mmu-miR-495	MIMAT0003456	NM_177586	Eif5a2	eukaryotic translation initiation factor 5A2	0	0	1	1	0	0	0	1	0	1	0
mmu-miR-495	MIMAT0003456	NM_199476	Rrm2b	ribonucleotide reductase M2 B (TP53 inducible)	0	0	1	1	0	0	0	1	0	1	0
mmu-miR-495	MIMAT0003456	NM_181753	Opn5	opsin 5	0	0	1	1	0	0	0	1	0	1	0
mmu-miR-495	MIMAT0003456	NM_199466	Eml4	echinoderm microtubule associated protein like 4	0	0	1	1	0	0	0	1	0	1	0
mmu-miR-495	MIMAT0003456	NM_181989	RP23-24J10.7	retinal short chain dehydrogenase reductase 2	0	0	1	1	0	0	0	1	0	1	0
mmu-miR-495	MIMAT0003456	NM_199306	Wdtc1	WD and tetratricopeptide repeats 1	0	0	1	1	0	0	0	1	0	1	0
mmu-miR-495	MIMAT0003456	NM_177407	Camk2a	calcium/calmodulin-dependent protein kinase II alpha	0	0	1	1	0	0	0	1	0	1	0
mmu-miR-495	MIMAT0003456	NM_182994	Arl5a	ADP-ribosylation factor-like 5A	0	0	1	1	0	0	0	1	0	1	0
mmu-miR-495	MIMAT0003456	NM_177595	Mkx	mohawk	0	0	1	1	0	0	0	1	0	1	0
mmu-miR-495	MIMAT0003456	NM_177616	4930562D19Rik	RIKEN cDNA 4930562D19 gene	0	0	1	1	0	0	0	1	0	1	0
mmu-miR-495	MIMAT0003456	NM_177715	Kctd12	potassium channel tetramerisation domain containing 12	0	0	1	1	0	0	0	1	0	1	0
mmu-miR-495	MIMAT0003456	NM_177701	EG235327	predicted gene, EG235327	0	0	1	1	0	0	0	1	0	1	0
mmu-miR-495	MIMAT0003456	NM_177694	Tmem16e	transmembrane protein 16E	0	0	1	1	0	0	0	1	0	1	0
mmu-miR-495	MIMAT0003456	NM_177692	Bloc1s3	biogenesis of lysosome-related organelles complex-1, subunit 3	0	0	1	1	0	0	0	1	0	1	0
mmu-miR-495	MIMAT0003456	NM_181416	Arhgap11a	Rho GTPase activating protein 11A	0	0	1	1	0	0	0	1	0	1	0
mmu-miR-495	MIMAT0003456	NM_181529	Syt15	synaptotagmin XV	0	0	1	1	0	0	0	1	0	1	0
mmu-miR-495	MIMAT0003456	NM_177662	Ctso	cathepsin O	0	0	1	1	0	0	0	1	0	1	0
mmu-miR-495	MIMAT0003456	NM_177622	Zfp595	zin finger protein 595	0	0	1	1	0	0	0	1	0	1	0
mmu-miR-495	MIMAT0003456	NM_181586	Sirt6	sirtuin 6 (silent mating type information regulation 2, homolog) 6 (S. cerevisiae)	0	0	1	1	0	0	0	1	0	1	0
mmu-miR-495	MIMAT0003456	NM_199196	Suz12	suppressor of zeste 12 homolog (Drosophila)	0	0	1	1	0	0	0	1	0	1	0
mmu-miR-495	MIMAT0003456	NM_178854	Cnot6l	CCR4-NOT transcription complex, subunit 6-like	0	0	1	1	0	0	0	1	0	1	0
mmu-miR-495	MIMAT0003456	NM_178729	Fbxl5	F-box and leucine-rich repeat protein 5	0	0	1	1	0	0	0	1	0	1	0
mmu-miR-495	MIMAT0003456	NM_207675	Cadm1	cell adhesion molecule 1	0	0	1	1	0	0	0	1	0	1	0
mmu-miR-495	MIMAT0003456	NM_213659	Stat3	signal transducer and activator of transcription 3	0	0	1	1	0	0	0	1	0	1	0
mmu-miR-495	MIMAT0003456	NM_207667	Fgf14	fibroblast growth factor 14	0	0	1	1	0	0	0	1	0	1	0
mmu-miR-495	MIMAT0003456	NM_178751	Orai2	ORAI calcium release-activated calcium modulator 2	0	0	1	1	0	0	0	1	0	1	0
mmu-miR-495	MIMAT0003456	NM_178752	D330012F22Rik	RIKEN cDNA D330012F22 gene	0	0	1	1	0	0	0	1	0	1	0
mmu-miR-495	MIMAT0003456	NM_178619	1810026J23Rik	RIKEN cDNA 1810026J23 gene	0	0	1	1	0	0	0	1	0	1	0
mmu-miR-495	MIMAT0003456	NM_178760	Gpr107	G protein-coupled receptor 107	0	0	1	1	0	0	0	1	0	1	0
mmu-miR-495	MIMAT0003456	NM_178615	Rgmb	RGM domain family, member B	0	0	1	1	0	0	0	1	0	1	0
mmu-miR-495	MIMAT0003456	NM_178613	4933433P14Rik	RIKEN cDNA 4933433P14 gene	0	0	1	1	0	0	0	1	0	1	0
mmu-miR-495	MIMAT0003456	NM_178736	Elmod2	ELMO domain containing 2	0	0	1	1	0	0	0	1	0	1	0
mmu-miR-495	MIMAT0003456	NM_178675	Slc35f1	solute carrier family 35, member F1	0	0	1	1	0	0	0	1	0	1	0
mmu-miR-495	MIMAT0003456	NM_178731	Lrrtm4	leucine rich repeat transmembrane neuronal 4	0	0	1	1	0	0	0	1	0	1	0
mmu-miR-495	MIMAT0003456	NM_212433	Fbxo3	F-box protein 3	0	0	1	1	0	0	0	1	0	1	0
mmu-miR-495	MIMAT0003456	NM_178695	Prrg4	proline rich Gla (G-carboxyglutamic acid) 4 (transmembrane)	0	0	1	1	0	0	0	1	0	1	0
mmu-miR-495	MIMAT0003456	NM_212435	Foxp2	forkhead box P2	0	0	1	1	0	0	0	1	0	1	0
mmu-miR-495	MIMAT0003456	NM_178691	Yod1	YOD1 OTU deubiquitinating enzyme 1 homologue (S. cerevisiae)	0	0	1	1	0	0	0	1	0	1	0
mmu-miR-495	MIMAT0003456	NM_207676	Cadm1	cell adhesion molecule 1	0	0	1	1	0	0	0	1	0	1	0
mmu-miR-495	MIMAT0003456	NM_212445	Kdelc2	KDEL (Lys-Asp-Glu-Leu) containing 2	0	0	1	1	0	0	0	1	0	1	0
mmu-miR-495	MIMAT0003456	NM_178683	Depdc1b	DEP domain containing 1B	0	0	1	1	0	0	0	1	0	1	0
mmu-miR-495	MIMAT0003456	NM_178678	Lrrtm3	leucine rich repeat transmembrane neuronal 3	0	0	1	1	0	0	0	1	0	1	0
mmu-miR-495	MIMAT0003456	NM_178610	Krr1	KRR1, small subunit (SSU) processome component, homolog (yeast)	0	0	1	1	0	0	0	1	0	1	0
mmu-miR-495	MIMAT0003456	NM_178608	Reep1	receptor accessory protein 1	0	0	1	1	0	0	0	1	0	1	0
mmu-miR-495	MIMAT0003456	NM_178793	Ccbe1	collagen and calcium binding EGF domains 1	0	0	1	1	0	0	0	1	0	1	0
mmu-miR-495	MIMAT0003456	NM_178267	Zfp827	zinc finger protein 827	0	0	1	1	0	0	0	1	0	1	0
mmu-miR-495	MIMAT0003456	NM_178258	Il22ra2	interleukin 22 receptor, alpha 2	0	0	1	1	0	0	0	1	0	1	0
mmu-miR-495	MIMAT0003456	NM_178794	Zrsr2	zinc finger (CCCH type), RNA binding motif and serine/arginine rich 2	0	0	1	1	0	0	0	1	0	1	0
mmu-miR-495	MIMAT0003456	NM_178243	5830403L16Rik	RIKEN cDNA 5830403L16 gene	0	0	1	1	0	0	0	1	0	1	0
mmu-miR-495	MIMAT0003456	NM_178227	Scn3b	sodium channel, voltage-gated, type III, beta	0	0	1	1	0	0	0	1	0	1	0
mmu-miR-495	MIMAT0003456	NM_178798	Slc7a6	solute carrier family 7 (cationic amino acid transporter, y+ system), member 6	0	0	1	1	0	0	0	1	0	1	0
mmu-miR-495	MIMAT0003456	NM_207248	4930433I11Rik	RIKEN cDNA 4930433I11 gene	0	0	1	1	0	0	0	1	0	1	0
mmu-miR-495	MIMAT0003456	NM_178716	Tnpo1	transportin 1	0	0	1	1	0	0	0	1	0	1	0
mmu-miR-495	MIMAT0003456	NM_207301	Wrb	tryptophan rich basic protein	0	0	1	1	0	0	0	1	0	1	0
mmu-miR-495	MIMAT0003456	NM_207515	Mbnl2	muscleblind-like 2	0	0	1	1	0	0	0	1	0	1	0
mmu-miR-495	MIMAT0003456	NM_207657	5031410I06Rik	RIKEN cDNA 5031410I06 gene	0	0	1	1	0	0	0	1	0	1	0
mmu-miR-495	MIMAT0003456	NM_178605	D13Wsu177e	DNA segment, Chr 13, Wayne State University 177, expressed	0	0	1	1	0	0	0	1	0	1	0
mmu-miR-495	MIMAT0003456	NM_178767	Tmem195	transmembrane protein 195	0	0	1	1	0	0	0	1	0	1	0
mmu-miR-495	MIMAT0003456	NM_207636	Fndc3a	fibronectin type III domain containing 3a	0	0	1	1	0	0	0	1	0	1	0
mmu-miR-495	MIMAT0003456	NM_178599	Commd8	COMM domain containing 8	0	0	1	1	0	0	0	1	0	1	0
mmu-miR-495	MIMAT0003456	NM_178597	Camk2g	calcium/calmodulin-dependent protein kinase II gamma	0	0	1	1	0	0	0	1	0	1	0
mmu-miR-495	MIMAT0003456	NM_207633	Yipf6	Yip1 domain family, member 6	0	0	1	1	0	0	0	1	0	1	0
mmu-miR-495	MIMAT0003456	NM_207623	Rnf138	ring finger protein 138	0	0	1	1	0	0	0	1	0	1	0
mmu-miR-495	MIMAT0003456	NM_178778	A930041I02Rik	RIKEN cDNA A930041I02 gene	0	0	1	1	0	0	0	1	0	1	0
mmu-miR-495	MIMAT0003456	NM_178141	3830406C13Rik	RIKEN cDNA 3830406C13 gene	0	0	1	1	0	0	0	1	0	1	0
mmu-miR-495	MIMAT0003456	NM_177186	A530082C11Rik	RIKEN cDNA A530082C11 gene	0	0	1	1	0	0	0	1	0	1	0
mmu-miR-495	MIMAT0003456	NM_177013	6332401O19Rik	RIKEN cDNA 6332401O19 gene	0	0	1	1	0	0	0	1	0	1	0
mmu-miR-495	MIMAT0003456	NM_183183	Gprin3	GPRIN family member 3	0	0	1	1	0	0	0	1	0	1	0
mmu-miR-495	MIMAT0003456	NM_176959	Fbxl7	F-box and leucine-rich repeat protein 7	0	0	1	1	0	0	0	1	0	1	0
mmu-miR-495	MIMAT0003456	NM_176952	6430573F11Rik	RIKEN cDNA 6430573F11 gene	0	0	1	1	0	0	0	1	0	1	0
mmu-miR-495	MIMAT0003456	NM_176845	Ddhd1	DDHD domain containing 1	0	0	1	1	0	0	0	1	0	1	0
mmu-miR-495	MIMAT0003456	NM_176841	Ccdc88a	coiled coil domain containing 88A	0	0	1	1	0	0	0	1	0	1	0
mmu-miR-495	MIMAT0003456	NM_176836	2810485I05Rik	RIKEN cDNA 2810485I05 gene	0	0	1	1	0	0	0	1	0	1	0
mmu-miR-495	MIMAT0003456	NM_177093	Lrrc58	leucine rich repeat containing 58	0	0	1	1	0	0	0	1	0	1	0
mmu-miR-495	MIMAT0003456	NM_177030	Dock6	dedicator of cytokinesis 6	0	0	1	1	0	0	0	1	0	1	0
mmu-miR-495	MIMAT0003456	NM_194268	Onecut2	one cut domain, family member 2	0	0	1	1	0	0	0	1	0	1	0
mmu-miR-495	MIMAT0003456	NM_177034	Apba1	amyloid beta (A4) precursor protein binding, family A, member 1	0	0	1	1	0	0	0	1	0	1	0
mmu-miR-495	MIMAT0003456	NM_177178	Lmbrd2	LMBR1 domain containing 2	0	0	1	1	0	0	0	1	0	1	0
mmu-miR-495	MIMAT0003456	NM_198671	Gse1	genetic suppressor element 1	0	0	1	1	0	0	0	1	0	1	0
mmu-miR-495	MIMAT0003456	NM_177164	A830006F12Rik	RIKEN cDNA A830006F12 gene	0	0	1	1	0	0	0	1	0	1	0
mmu-miR-495	MIMAT0003456	NM_177139	Lypd6	LY6/PLAUR domain containing 6	0	0	1	1	0	0	0	1	0	1	0
mmu-miR-495	MIMAT0003456	NM_177133	E330018D03Rik	RIKEN cDNA E330018D03 gene	0	0	1	1	0	0	0	1	0	1	0
mmu-miR-495	MIMAT0003456	NM_177086	Zmat4	zinc finger, matrin type 4	0	0	1	1	0	0	0	1	0	1	0
mmu-miR-495	MIMAT0003456	NM_177078	Adrbk2	adrenergic receptor kinase, beta 2	0	0	1	1	0	0	0	1	0	1	0
mmu-miR-495	MIMAT0003456	NM_177067	3110048E14Rik	RIKEN cDNA 3110048E14 gene	0	0	1	1	0	0	0	1	0	1	0
mmu-miR-495	MIMAT0003456	NM_175770	Taf7	TAF7 RNA polymerase II, TATA box binding protein (TBP)-associated factor	0	0	1	1	0	0	0	1	0	1	0
mmu-miR-495	MIMAT0003456	NM_198033	Setx	senataxin	0	0	1	1	0	0	0	1	0	1	0
mmu-miR-495	MIMAT0003456	NM_175539	Wdr40c	WD repeat domain 40C	0	0	1	1	0	0	0	1	0	1	0
mmu-miR-495	MIMAT0003456	NM_198127	Abi2	abl-interactor 2	0	0	1	1	0	0	0	1	0	1	0
mmu-miR-495	MIMAT0003456	NM_198167	Tmem63b	transmembrane protein 63b	0	0	1	1	0	0	0	1	0	1	0
mmu-miR-495	MIMAT0003456	NM_175523	Ppm1k	protein phosphatase 1K (PP2C domain containing)	0	0	1	1	0	0	0	1	0	1	0
mmu-miR-495	MIMAT0003456	NM_175519	Kctd8	potassium channel tetramerisation domain containing 8	0	0	1	1	0	0	0	1	0	1	0
mmu-miR-495	MIMAT0003456	NM_175515	Intu	inturned planar cell polarity effector homolog (Drosophila)	0	0	1	1	0	0	0	1	0	1	0
mmu-miR-495	MIMAT0003456	NM_175503	Aard	alanine and arginine rich domain containing protein	0	0	1	1	0	0	0	1	0	1	0
mmu-miR-495	MIMAT0003456	NM_175498	Pnma2	paraneoplastic antigen MA2	0	0	1	1	0	0	0	1	0	1	0
mmu-miR-495	MIMAT0003456	NM_198111	Akap6	A kinase (PRKA) anchor protein 6	0	0	1	1	0	0	0	1	0	1	0
mmu-miR-495	MIMAT0003456	NM_175551	Dido1	death inducer-obliterator 1	0	0	1	1	0	0	0	1	0	1	0
mmu-miR-495	MIMAT0003456	NM_175558	Zfp446	zinc finger protein 446	0	0	1	1	0	0	0	1	0	1	0
mmu-miR-495	MIMAT0003456	NM_175692	A930034L06Rik	RIKEN cDNA A930034L06 gene	0	0	1	1	0	0	0	1	0	1	0
mmu-miR-495	MIMAT0003456	NM_175683	Dclre1c	DNA cross-link repair 1C, PSO2 homolog (S. cerevisiae)	0	0	1	1	0	0	0	1	0	1	0
mmu-miR-495	MIMAT0003456	NM_175675	4930471M23Rik	RIKEN cDNA 4930471M23 gene	0	0	1	1	0	0	0	1	0	1	0
mmu-miR-495	MIMAT0003456	NM_198416	Zzz3	zinc finger, ZZ domain containing 3	0	0	1	1	0	0	0	1	0	1	0
mmu-miR-495	MIMAT0003456	NM_198052	Tbx3	T-box 3	0	0	1	1	0	0	0	1	0	1	0
mmu-miR-495	MIMAT0003456	NM_198101	Gmip	Gem-interacting protein	0	0	1	1	0	0	0	1	0	1	0
mmu-miR-495	MIMAT0003456	NM_198414	Paqr9	progestin and adipoQ receptor family member IX	0	0	1	1	0	0	0	1	0	1	0
mmu-miR-495	MIMAT0003456	NM_175631	Cbln4	cerebellin 4 precursor protein	0	0	1	1	0	0	0	1	0	1	0
mmu-miR-495	MIMAT0003456	NM_177239	Mysm1	myb-like, SWIRM and MPN domains 1	0	0	1	1	0	0	0	1	0	1	0
mmu-miR-495	MIMAT0003456	NM_177263	Zhx3	zinc fingers and homeoboxes 3	0	0	1	1	0	0	0	1	0	1	0
mmu-miR-495	MIMAT0003456	NM_198702	Lphn3	latrophilin 3	0	0	1	1	0	0	0	1	0	1	0
mmu-miR-495	MIMAT0003456	NM_198862	Nlgn2	neuroligin 2	0	0	1	1	0	0	0	1	0	1	0
mmu-miR-495	MIMAT0003456	NM_198865	Slitrk5	SLIT and NTRK-like family, member 5	0	0	1	1	0	0	0	1	0	1	0
mmu-miR-495	MIMAT0003456	NM_199025	Zbtb26	zinc finger and BTB domain containing 26	0	0	1	1	0	0	0	1	0	1	0
mmu-miR-495	MIMAT0003456	NM_177253	Cstf3	cleavage stimulation factor, 3" pre-RNA, subunit 3	0	0	1	1	0	0	0	1	0	1	0
mmu-miR-495	MIMAT0003456	NM_177776	Smtnl2	smoothelin-like 2	0	0	1	1	0	0	0	1	0	1	0
mmu-miR-495	MIMAT0003456	NM_183191	Plch1	phospholipase C, eta 1	0	0	1	1	0	0	0	1	0	1	0
mmu-miR-495	MIMAT0003456	NM_177314	5330439B14Rik	RIKEN cDNA 5330439B14 gene	0	0	1	1	0	0	0	1	0	1	0
mmu-miR-495	MIMAT0003456	NM_183216	Scd4	stearoyl-coenzyme A desaturase 4	0	0	1	1	0	0	0	1	0	1	0
mmu-miR-495	MIMAT0003456	NM_177301	Hnrnpl	heterogeneous nuclear ribonucleoprotein L	0	0	1	1	0	0	0	1	0	1	0
mmu-miR-495	MIMAT0003456	NM_199016	Enpp4	ectonucleotide pyrophosphatase/phosphodiesterase 4	0	0	1	1	0	0	0	1	0	1	0
mmu-miR-495	MIMAT0003456	NM_177359	6030490I01Rik	RIKEN cDNA 6030490I01 gene	0	0	1	1	0	0	0	1	0	1	0
mmu-miR-495	MIMAT0003456	NM_199068	Foxk1	forkhead box K1	0	0	1	1	0	0	0	1	0	1	0
mmu-miR-495	MIMAT0003456	NM_177224	Chd9	chromodomain helicase DNA binding protein 9	0	0	1	1	0	0	0	1	0	1	0
mmu-miR-495	MIMAT0003456	NM_198683	Cugbp1	CUG triplet repeat, RNA binding protein 1	0	0	1	1	0	0	0	1	0	1	0
mmu-miR-495	MIMAT0003456	NM_177259	Dab1	disabled homolog 1 (Drosophila)	0	0	1	1	0	0	0	1	0	1	0
mmu-miR-495	MIMAT0003456	NM_177366	Gpr157	G protein-coupled receptor 157	0	0	1	1	0	0	0	1	0	1	0
mmu-miR-495	MIMAT0003456	NM_199143	Znrf2	zinc and ring finger 2	0	0	1	1	0	0	0	1	0	1	0
mmu-miR-495	MIMAT0003456	NM_177386	Sfmbt2	Scm-like with four mbt domains 2	0	0	1	1	0	0	0	1	0	1	0
mmu-miR-495	MIMAT0003456	NM_177381	Cog3	component of oligomeric golgi complex 3	0	0	1	1	0	0	0	1	0	1	0
mmu-miR-495	MIMAT0003456	NM_207668	Acpp	acid phosphatase, prostate	0	0	1	0	0	0	0	1	0	1	0
mmu-miR-495	MIMAT0003456	NM_207237	Man1c1	mannosidase, alpha, class 1C, member 1	0	0	1	0	0	0	0	1	0	1	0
mmu-miR-495	MIMAT0003456	NM_207663	Dmn	desmuslin	0	0	1	0	0	0	0	1	0	1	0
mmu-miR-495	MIMAT0003456	NM_198642	5031414D18Rik	RIKEN cDNA 5031414D18 gene	0	0	1	0	0	0	0	1	0	1	0
mmu-miR-495	MIMAT0003456	NM_201368	Xkr8	X Kell blood group precursor related family member 8 homolog	0	0	1	0	0	0	0	1	0	1	0
mmu-miR-495	MIMAT0003456	NM_199323	Tacc1	transforming, acidic coiled-coil containing protein 1	0	0	1	0	0	0	0	1	0	1	0
mmu-miR-495	MIMAT0003456	NM_198248	Zbtb40	zinc finger and BTB domain containing 40	0	0	1	0	0	0	0	1	0	1	0
mmu-miR-495	MIMAT0003456	NM_198423	Bahcc1	BAH domain and coiled-coil containing 1	0	0	1	0	0	0	0	1	0	1	0
mmu-miR-495	MIMAT0003456	NM_198424	Orai3	ORAI calcium release-activated calcium modulator 3	0	0	1	0	0	0	0	1	0	1	0
mmu-miR-495	MIMAT0003456	NM_201243	Pcdha8	protocadherin alpha 8	0	0	1	0	0	0	0	1	0	1	0
mmu-miR-495	MIMAT0003456	NM_207680	Bcl2l11	BCL2-like 11 (apoptosis facilitator)	0	0	1	0	0	0	0	1	0	1	0
mmu-miR-495	MIMAT0003456	NM_198294	Tanc1	tetratricopeptide repeat, ankyrin repeat and coiled-coil containing 1	0	0	1	0	0	0	0	1	0	1	0
mmu-miR-495	MIMAT0003456	NM_199022	Shc4	SHC (Src homology 2 domain containing) family, member 4	0	0	1	0	0	0	0	1	0	1	0
mmu-miR-495	MIMAT0003456	NM_198247	Sertad4	SERTA domain containing 4	0	0	1	0	0	0	0	1	0	1	0
mmu-miR-495	MIMAT0003456	XM_924581	Zfp719	zinc finger protein 719	0	0	1	1	0	0	0	0	0	1	0
mmu-miR-495	MIMAT0003456	NM_199060	AF067061	cDNA sequence AF067061	0	0	1	1	0	0	0	0	0	1	0
mmu-miR-495	MIMAT0003456	NM_199299	Phf15	PHD finger protein 15	0	0	1	0	0	0	0	1	0	1	0
mmu-miR-495	MIMAT0003456	NM_199017	9230110C19Rik	RIKEN cDNA 9230110C19 gene	0	0	1	0	0	0	0	1	0	1	0
mmu-miR-495	MIMAT0003456	NM_199469	Nploc4	nuclear protein localization 4 homolog (S. cerevisiae)	0	0	1	0	0	0	0	1	0	1	0
mmu-miR-495	MIMAT0003456	NM_201230	Fgfr1op	Fgfr1 oncogene partner	0	0	1	0	0	0	0	1	0	1	0
mmu-miR-495	MIMAT0003456	NM_198601	Trim52	tripartite motif-containing 52	0	0	1	0	0	0	0	1	0	1	0
mmu-miR-495	MIMAT0003456	NM_198647	Tbc1d22b	TBC1 domain family, member 22B	0	0	1	0	0	0	0	1	0	1	0
mmu-miR-495	MIMAT0003456	NM_201531	Kcnf1	potassium voltage-gated channel, subfamily F, member 1	0	0	1	0	0	0	0	1	0	1	0
mmu-miR-495	MIMAT0003456	NM_198654	Nsl1	NSL1, MIND kinetochore complex component, homolog (S. cerevisiae)	0	0	1	0	0	0	0	1	0	1	0
mmu-miR-495	MIMAT0003456	NM_207225	Hdac4	histone deacetylase 4	0	0	1	0	0	0	0	1	0	1	0
mmu-miR-495	MIMAT0003456	NM_198417	C030039L03Rik	RIKEN cDNA C030039L03 gene	0	0	1	0	0	0	0	1	0	1	0
mmu-miR-495	MIMAT0003456	NM_198657	EG381438	predicted gene, EG381438	0	0	1	1	0	0	0	1	0	0	0
mmu-miR-495	MIMAT0003456	NM_207217	Itfg3	integrin alpha FG-GAP repeat containing 3	0	0	1	0	0	0	0	1	0	1	0
mmu-miR-495	MIMAT0003456	NM_198675	D630004A14Rik	RIKEN cDNA D630004A14 gene	0	0	1	0	0	0	0	1	0	1	0
mmu-miR-495	MIMAT0003456	NM_206535	Cd200r2	Cd200 receptor 2	0	0	1	0	0	0	0	1	0	1	0
mmu-miR-495	MIMAT0003456	NM_206534	Churc1	churchill domain containing 1	0	0	1	0	0	0	0	1	0	1	0
mmu-miR-495	MIMAT0003456	NM_205810	Mrgprb1	MAS-related GPR, member B1	0	0	1	0	0	0	0	1	0	1	0
mmu-miR-495	MIMAT0003456	NM_201639	Dmn	desmuslin	0	0	1	0	0	0	0	1	0	1	0
mmu-miR-495	MIMAT0003456	NM_198658	Nr1h5	nuclear receptor subfamily 1, group H, member 5	0	0	1	0	0	0	0	1	0	1	0
mmu-miR-495	MIMAT0003456	NM_199018	Stard8	START domain containing 8	0	0	1	0	0	0	0	1	0	1	0
mmu-miR-495	MIMAT0003456	NM_207228	Tsga10	testis specific 10	0	0	1	0	0	0	0	1	0	1	0
mmu-miR-495	MIMAT0003456	NM_198894	Abr	active BCR-related gene	0	0	1	0	0	0	0	1	0	1	0
mmu-miR-495	MIMAT0003456	NM_199007	Sgol2	shugoshin-like 2 (S. pombe)	0	0	1	0	0	0	0	1	0	1	0
mmu-miR-495	MIMAT0003456	NM_198614	4932409I22Rik	RIKEN cDNA 4932409I22 gene	0	0	1	0	0	0	0	1	0	1	0
mmu-miR-495	MIMAT0003456	NM_198616	Ccdc85b	coiled-coil domain containing 85B	0	0	1	0	0	0	0	1	0	1	0
mmu-miR-495	MIMAT0003456	NM_207282	B930011P16Rik	RIKEN cDNA B930011P16 gene	0	0	1	0	0	0	0	1	0	1	0
mmu-miR-495	MIMAT0003456	NM_207278	Tigd4	tigger transposable element derived 4	0	0	1	0	0	0	0	1	0	1	0
mmu-miR-495	MIMAT0003456	NM_198619	2810408P10Rik	RIKEN cDNA 2810408P10 gene	0	0	1	0	0	0	0	1	0	1	0
mmu-miR-495	MIMAT0003456	NM_201369	N4bp2l2	NEDD4 binding protein 2-like 2	0	0	1	0	0	0	0	1	0	1	0
mmu-miR-495	MIMAT0003456	NM_201407	Dennd4b	DENN/MADD domain containing 4B	0	0	1	0	0	0	0	1	0	1	0
mmu-miR-495	MIMAT0003456	NM_198620	Rundc3b	RUN domain containing 3B	0	0	1	0	0	0	0	1	0	1	0
mmu-miR-495	MIMAT0003456	NM_198626	AI480653	expressed sequence AI480653	0	0	1	0	0	0	0	1	0	1	0
mmu-miR-495	MIMAT0003456	NM_207264	BC052040	cDNA sequence BC052040	0	0	1	0	0	0	0	1	0	1	0
mmu-miR-495	MIMAT0003456	NM_199145	3110062M04Rik	RIKEN cDNA 3110062M04 gene	0	0	1	0	0	0	0	1	0	1	0
mmu-miR-495	MIMAT0003456	NM_207244	Cd200r4	Cd200 receptor 4	0	0	1	0	0	0	0	1	0	1	0
mmu-miR-495	MIMAT0003456	NM_198895	Abr	active BCR-related gene	0	0	1	0	0	0	0	1	0	1	0
mmu-miR-495	MIMAT0003456	NM_203319	Dhx37	DEAH (Asp-Glu-Ala-His) box polypeptide 37	0	0	1	0	0	0	0	1	0	1	0
mmu-miR-495	MIMAT0003456	NM_207681	Bcl2l11	BCL2-like 11 (apoptosis facilitator)	0	0	1	0	0	0	0	1	0	1	0
mmu-miR-495	MIMAT0003456	XM_908336	EG408191	predicted gene, EG408191	0	0	1	1	0	0	0	0	0	1	0
mmu-miR-495	MIMAT0003456	XM_912718	Trip11	thyroid hormone receptor interactor 11	0	0	1	1	0	0	0	0	0	1	0
mmu-miR-495	MIMAT0003456	XM_914663	BC003965	cDNA sequence BC003965	0	0	1	1	0	0	0	0	0	1	0
mmu-miR-495	MIMAT0003456	XM_914676	Bdp1	B double prime 1, subunit of RNA polymerase III transcription initiation factor IIIB	0	0	1	1	0	0	0	0	0	1	0
mmu-miR-495	MIMAT0003456	XM_914945	LOC638800	similar to Clast3 protein	0	0	1	1	0	0	0	0	0	1	0
mmu-miR-495	MIMAT0003456	XM_915307	Mast4	microtubule associated serine/threonine kinase family member 4	0	0	1	1	0	0	0	0	0	1	0
mmu-miR-495	MIMAT0003456	XM_915579	Lrrc38	leucine rich repeat containing 38	0	0	1	1	0	0	0	0	0	1	0
mmu-miR-495	MIMAT0003456	XM_915812	EG623169	predicted gene, EG623169	0	0	1	1	0	0	0	0	0	1	0
mmu-miR-495	MIMAT0003456	XM_916412	5330426P16Rik	RIKEN cDNA 5330426P16 gene	0	0	1	1	0	0	0	0	0	1	0
mmu-miR-495	MIMAT0003456	XM_916570	EG625660	predicted gene, EG625660	0	0	1	1	0	0	0	0	0	1	0
mmu-miR-495	MIMAT0003456	XM_917341	Zc3h12c	zinc finger CCCH type containing 12C	0	0	1	1	0	0	0	0	0	1	0
mmu-miR-495	MIMAT0003456	XM_917391	LOC640441	similar to thrombospondin 1	0	0	1	1	0	0	0	0	0	1	0
mmu-miR-495	MIMAT0003456	XM_917405	Anks1b	ankyrin repeat and sterile alpha motif domain containing 1B	0	0	1	1	0	0	0	0	0	1	0
mmu-miR-495	MIMAT0003456	XM_912494	Nova1	neuro-oncological ventral antigen 1	0	0	1	1	0	0	0	0	0	1	0
mmu-miR-495	MIMAT0003456	XM_912450	5430427O19Rik	RIKEN cDNA 5430427O19 gene	0	0	1	1	0	0	0	0	0	1	0
mmu-miR-495	MIMAT0003456	XM_908442	Ccdc6	coiled-coil domain containing 6	0	0	1	1	0	0	0	0	0	1	0
mmu-miR-495	MIMAT0003456	XM_908475	Polr3c	polymerase (RNA) III (DNA directed) polypeptide C	0	0	1	1	0	0	0	0	0	1	0
mmu-miR-495	MIMAT0003456	XM_908676	C130092O11Rik	RIKEN cDNA C130092O11 gene	0	0	1	1	0	0	0	0	0	1	0
mmu-miR-495	MIMAT0003456	XM_908790	LOC634148	similar to UDP-Gal:betaGal beta 1,3-galactosyltransferase, polypeptide 6	0	0	1	1	0	0	0	0	0	1	0
mmu-miR-495	MIMAT0003456	XM_908972	Trio	triple functional domain (PTPRF interacting)	0	0	1	1	0	0	0	0	0	1	0
mmu-miR-495	MIMAT0003456	XM_909931	Kctd16	potassium channel tetramerisation domain containing 16	0	0	1	1	0	0	0	0	0	1	0
mmu-miR-495	MIMAT0003456	XM_910436	LOC629862	similar to Protein C10orf70	0	0	1	1	0	0	0	0	0	1	0
mmu-miR-495	MIMAT0003456	XM_910737	Ythdc2	YTH domain containing 2	0	0	1	1	0	0	0	0	0	1	0
mmu-miR-495	MIMAT0003456	XM_910911	2310039D24Rik	RIKEN cDNA 2310039D24 gene	0	0	1	1	0	0	0	0	0	1	0
mmu-miR-495	MIMAT0003456	XM_910975	D830031N03Rik	RIKEN cDNA D830031N03 gene	0	0	1	1	0	0	0	0	0	1	0
mmu-miR-495	MIMAT0003456	XM_911881	1110033M05Rik	RIKEN cDNA 1110033M05 gene	0	0	1	1	0	0	0	0	0	1	0
mmu-miR-495	MIMAT0003456	XM_911969	LOC636537	similar to signal sequence receptor, alpha	0	0	1	1	0	0	0	0	0	1	0
mmu-miR-495	MIMAT0003456	XM_917424	LOC636534	similar to FERM domain containing protein 6	0	0	1	1	0	0	0	0	0	1	0
mmu-miR-495	MIMAT0003456	XM_920202	Stx11	syntaxin 11	0	0	1	1	0	0	0	0	0	1	0
mmu-miR-495	MIMAT0003456	XM_921499	LOC633467	similar to Tripartite motif protein 6	0	0	1	1	0	0	0	0	0	1	0
mmu-miR-495	MIMAT0003456	XM_979370	EG665338	predicted gene, EG665338	0	0	1	1	0	0	0	0	0	1	0
mmu-miR-495	MIMAT0003456	XM_979562	Etnk1	ethanolamine kinase 1	0	0	1	1	0	0	0	0	0	1	0
mmu-miR-495	MIMAT0003456	XM_980580	Zcchc2	zinc finger, CCHC domain containing 2	0	0	1	1	0	0	0	0	0	1	0
mmu-miR-495	MIMAT0003456	XM_981153	EG666040	predicted gene, EG666040	0	0	1	1	0	0	0	0	0	1	0
mmu-miR-495	MIMAT0003456	XM_983541	1500005K14Rik	RIKEN cDNA 1500005K14 gene	0	0	1	1	0	0	0	0	0	1	0
mmu-miR-495	MIMAT0003456	XM_984400	Zfp433	RIKEN cDNA 1700123A16 gene	0	0	1	1	0	0	0	0	0	1	0
mmu-miR-495	MIMAT0003456	XM_985344	2610301G19Rik	RIKEN cDNA 2610301G19 gene	0	0	1	1	0	0	0	0	0	1	0
mmu-miR-495	MIMAT0003456	XM_986599	EG666183	predicted gene, EG666183	0	0	1	1	0	0	0	0	0	1	0
mmu-miR-495	MIMAT0003456	XM_988198	C130092O11Rik	RIKEN cDNA C130092O11 gene	0	0	1	1	0	0	0	0	0	1	0
mmu-miR-495	MIMAT0003456	XM_989488	D330025C20Rik	RIKEN cDNA D330025C20 gene	0	0	1	1	0	0	0	0	0	1	0
mmu-miR-495	MIMAT0003456	XM_989868	Cep170	centrosomal protein 170	0	0	1	1	0	0	0	0	0	1	0
mmu-miR-495	MIMAT0003456	XM_992555	EG433637	predicted gene, EG433637	0	0	1	1	0	0	0	0	0	1	0
mmu-miR-495	MIMAT0003456	XM_978968	EG665719	predicted gene, EG665719	0	0	1	1	0	0	0	0	0	1	0
mmu-miR-495	MIMAT0003456	XM_977840	C030010C08Rik	RIKEN cDNA C030010C08 gene	0	0	1	1	0	0	0	0	0	1	0
mmu-miR-495	MIMAT0003456	XM_921802	LOC622577	hypothetical LOC622577	0	0	1	1	0	0	0	0	0	1	0
mmu-miR-495	MIMAT0003456	XM_922411	Nova1	neuro-oncological ventral antigen 1	0	0	1	1	0	0	0	0	0	1	0
mmu-miR-495	MIMAT0003456	XM_922797	Rbm27	RNA binding motif protein 27	0	0	1	1	0	0	0	0	0	1	0
mmu-miR-495	MIMAT0003456	XM_923021	LOC381355	hypothetical LOC381355	0	0	1	1	0	0	0	0	0	1	0
mmu-miR-495	MIMAT0003456	XM_923606	D6Ertd527e	DNA segment, Chr 6, ERATO Doi 527, expressed	0	0	1	1	0	0	0	0	0	1	0
mmu-miR-495	MIMAT0003456	XM_924235	BC032203	cDNA sequence BC032203	0	0	1	1	0	0	0	0	0	1	0
mmu-miR-495	MIMAT0003456	XM_973024	EG664804	predicted gene, EG664804	0	0	1	1	0	0	0	0	0	1	0
mmu-miR-495	MIMAT0003456	XM_973329	LOC664837	hypothetical LOC664837	0	0	1	1	0	0	0	0	0	1	0
mmu-miR-495	MIMAT0003456	XM_973359	1700071A11Rik	RIKEN cDNA 1700071A11 gene	0	0	1	1	0	0	0	0	0	1	0
mmu-miR-495	MIMAT0003456	XM_973616	EG621440	predicted gene, EG621440	0	0	1	1	0	0	0	0	0	1	0
mmu-miR-495	MIMAT0003456	XM_974210	D330025C20Rik	RIKEN cDNA D330025C20 gene	0	0	1	1	0	0	0	0	0	1	0
mmu-miR-495	MIMAT0003456	XM_976380	LOC674678	similar to germinal histone H4 gene	0	0	1	1	0	0	0	0	0	1	0
mmu-miR-495	MIMAT0003456	XM_992800	5330426P16Rik	RIKEN cDNA 5330426P16 gene	0	0	1	1	0	0	0	0	0	1	0
mmu-miR-495	MIMAT0003456	XM_908334	Etnk1	ethanolamine kinase 1	0	0	1	1	0	0	0	0	0	1	0
mmu-miR-495	MIMAT0003456	NM_207692	Mapk9	mitogen-activated protein kinase 9	0	0	1	0	0	0	0	1	0	1	0
mmu-miR-495	MIMAT0003456	XM_125673	Tet1	tet oncogene 1	0	0	1	1	0	0	0	0	0	1	0
mmu-miR-495	MIMAT0003456	XM_125901	Cand1	cullin associated and neddylation disassociated 1	0	0	1	1	0	0	0	0	0	1	0
mmu-miR-495	MIMAT0003456	XM_128924	Rbm27	RNA binding motif protein 27	0	0	1	1	0	0	0	0	0	1	0
mmu-miR-495	MIMAT0003456	XM_129357	D19Ertd652e	DNA segment, Chr 19, ERATO Doi 652, expressed	0	0	1	1	0	0	0	0	0	1	0
mmu-miR-495	MIMAT0003456	XM_129603	Tdrd5	tudor domain containing 5	0	0	1	1	0	0	0	0	0	1	0
mmu-miR-495	MIMAT0003456	XM_131049	Polr3c	polymerase (RNA) III (DNA directed) polypeptide C	0	0	1	1	0	0	0	0	0	1	0
mmu-miR-495	MIMAT0003456	XM_134476	2310039D24Rik	RIKEN cDNA 2310039D24 gene	0	0	1	1	0	0	0	0	0	1	0
mmu-miR-495	MIMAT0003456	XM_140308	Dcp2	DCP2 decapping enzyme homolog (S. cerevisiae)	0	0	1	1	0	0	0	0	0	1	0
mmu-miR-495	MIMAT0003456	XM_893519	EG628746	predicted gene, EG628746	0	0	1	1	0	0	0	0	0	1	0
mmu-miR-495	MIMAT0003456	XM_144076	Lrrc38	leucine rich repeat containing 38	0	0	1	1	0	0	0	0	0	1	0
mmu-miR-495	MIMAT0003456	XM_145574	Zfp719	zinc finger protein 719	0	0	1	1	0	0	0	0	0	1	0
mmu-miR-495	MIMAT0003456	XM_146893	Zc3h12c	zinc finger CCCH type containing 12C	0	0	1	1	0	0	0	0	0	1	0
mmu-miR-495	MIMAT0003456	XM_001004384	Syde2	synapse defective 1, Rho GTPase, homolog 2 (C. elegans)	0	0	1	1	0	0	0	0	0	1	0
mmu-miR-495	MIMAT0003456	XM_001004030	EG667631	predicted gene, EG667631	0	0	1	1	0	0	0	0	0	1	0
mmu-miR-495	MIMAT0003456	NM_210071	Eya3	eyes absent 3 homolog (Drosophila)	0	0	1	0	0	0	0	1	0	1	0
mmu-miR-495	MIMAT0003456	NM_211357	Eya3	eyes absent 3 homolog (Drosophila)	0	0	1	0	0	0	0	1	0	1	0
mmu-miR-495	MIMAT0003456	NM_212444	Gyk	glycerol kinase	0	0	1	0	0	0	0	1	0	1	0
mmu-miR-495	MIMAT0003456	NM_212446	Psmf1	proteasome (prosome, macropain) inhibitor subunit 1	0	0	1	0	0	0	0	1	0	1	0
mmu-miR-495	MIMAT0003456	NM_212468	Ssbp1	single-stranded DNA binding protein 1	0	0	1	0	0	0	0	1	0	1	0
mmu-miR-495	MIMAT0003456	NM_212486	Gimap8	GTPase, IMAP family member 8	0	0	1	0	0	0	0	1	0	1	0
mmu-miR-495	MIMAT0003456	XM_001001238	BC032203	cDNA sequence BC032203	0	0	1	1	0	0	0	0	0	1	0
mmu-miR-495	MIMAT0003456	XM_001001408	LOC677213	similar to U2AF homology motif (UHM) kinase 1	0	0	1	1	0	0	0	0	0	1	0
mmu-miR-495	MIMAT0003456	XM_001001452	2610301G19Rik	RIKEN cDNA 2610301G19 gene	0	0	1	1	0	0	0	0	0	1	0
mmu-miR-495	MIMAT0003456	XM_001001530	LOC676960	similar to Transmembrane gamma-carboxyglutamic acid protein 4 precursor (Proline-rich Gla protein 4) (Proline-rich gamma-carboxyglutamic acid protein 4)	0	0	1	1	0	0	0	0	0	1	0
mmu-miR-495	MIMAT0003456	XM_001002526	Irf2bp2	interferon regulatory factor 2 binding protein 2	0	0	1	1	0	0	0	0	0	1	0
mmu-miR-495	MIMAT0003456	XM_001003400	Anks1b	ankyrin repeat and sterile alpha motif domain containing 1B	0	0	1	1	0	0	0	0	0	1	0
mmu-miR-495	MIMAT0003456	XM_148109	Atf7ip2	activating transcription factor 7 interacting protein 2	0	0	1	1	0	0	0	0	0	1	0
mmu-miR-495	MIMAT0003456	XM_193728	1110033M05Rik	RIKEN cDNA 1110033M05 gene	0	0	1	1	0	0	0	0	0	1	0
mmu-miR-495	MIMAT0003456	XM_283179	Mast4	microtubule associated serine/threonine kinase family member 4	0	0	1	1	0	0	0	0	0	1	0
mmu-miR-495	MIMAT0003456	XM_885053	D830031N03Rik	RIKEN cDNA D830031N03 gene	0	0	1	1	0	0	0	0	0	1	0
mmu-miR-495	MIMAT0003456	XM_886902	OTTMUSG00000009528	predicted gene, OTTMUSG00000009528	0	0	1	1	0	0	0	0	0	1	0
mmu-miR-495	MIMAT0003456	XM_887934	EG408191	predicted gene, EG408191	0	0	1	1	0	0	0	0	0	1	0
mmu-miR-495	MIMAT0003456	XM_892560	BC043476	cDNA sequence BC043476	0	0	1	1	0	0	0	0	0	1	0
mmu-miR-495	MIMAT0003456	XM_892956	EG623169	predicted gene, EG623169	0	0	1	1	0	0	0	0	0	1	0
mmu-miR-495	MIMAT0003456	XM_896683	Stx11	syntaxin 11	0	0	1	1	0	0	0	0	0	1	0
mmu-miR-495	MIMAT0003456	XM_897188	LOC622577	hypothetical LOC622577	0	0	1	1	0	0	0	0	0	1	0
mmu-miR-495	MIMAT0003456	XM_900683	5430427O19Rik	RIKEN cDNA 5430427O19 gene	0	0	1	1	0	0	0	0	0	1	0
mmu-miR-495	MIMAT0003456	XM_904108	Cand1	cullin associated and neddylation disassociated 1	0	0	1	1	0	0	0	0	0	1	0
mmu-miR-495	MIMAT0003456	XM_904187	LOC624112	hypothetical protein LOC624112	0	0	1	1	0	0	0	0	0	1	0
mmu-miR-495	MIMAT0003456	XM_904314	Ankrd57	ankyrin repeat domain 57	0	0	1	1	0	0	0	0	0	1	0
mmu-miR-495	MIMAT0003456	XM_904631	LOC630963	similar to spectrin alpha 1	0	0	1	1	0	0	0	0	0	1	0
mmu-miR-495	MIMAT0003456	XM_884335	Ankrd57	ankyrin repeat domain 57	0	0	1	1	0	0	0	0	0	1	0
mmu-miR-495	MIMAT0003456	XM_489641	Plcxd2	phosphatidylinositol-specific phospholipase C, X domain containing 2	0	0	1	1	0	0	0	0	0	1	0
mmu-miR-495	MIMAT0003456	XM_283804	9830001H06Rik	RIKEN cDNA 9830001H06 gene	0	0	1	1	0	0	0	0	0	1	0
mmu-miR-495	MIMAT0003456	XM_284454	Irf2bp2	interferon regulatory factor 2 binding protein 2	0	0	1	1	0	0	0	0	0	1	0
mmu-miR-495	MIMAT0003456	XM_354987	BC043476	cDNA sequence BC043476	0	0	1	1	0	0	0	0	0	1	0
mmu-miR-495	MIMAT0003456	XM_484225	AK157302	cDNA sequence AK157302	0	0	1	1	0	0	0	0	0	1	0
mmu-miR-495	MIMAT0003456	XM_484524	A930007A09Rik	RIKEN cDNA A930007A09 gene	0	0	1	1	0	0	0	0	0	1	0
mmu-miR-495	MIMAT0003456	XM_485202	Zbtb10	zinc finger and BTB domain containing 10	0	0	1	1	0	0	0	0	0	1	0
mmu-miR-495	MIMAT0003456	XM_485815	EG434077	predicted gene, EG434077	0	0	1	1	0	0	0	0	0	1	0
mmu-miR-495	MIMAT0003456	XM_486266	4921528I07Rik	RIKEN cDNA 4921528I07 gene	0	0	1	1	0	0	0	0	0	1	0
mmu-miR-495	MIMAT0003456	XM_488935	LOC433404	hypothetical LOC433404	0	0	1	1	0	0	0	0	0	1	0
mmu-miR-495	MIMAT0003456	XM_489019	EG433637	predicted gene, EG433637	0	0	1	1	0	0	0	0	0	1	0
mmu-miR-495	MIMAT0003456	XM_489144	D6Ertd527e	DNA segment, Chr 6, ERATO Doi 527, expressed	0	0	1	1	0	0	0	0	0	1	0
mmu-miR-495	MIMAT0003456	XM_489510	Atf7ip2	activating transcription factor 7 interacting protein 2	0	0	1	1	0	0	0	0	0	1	0
mmu-miR-495	MIMAT0003456	XM_907080	Tet1	tet oncogene 1	0	0	1	1	0	0	0	0	0	1	0
mmu-miR-495	MIMAT0003456	NM_198214	Snph	syntaphilin	0	0	1	0	0	0	0	1	0	1	0
mmu-miR-495	MIMAT0003456	NM_177395	Map3k9	mitogen-activated protein kinase kinase kinase 9	0	0	1	0	0	0	0	1	0	1	0
mmu-miR-495	MIMAT0003456	NM_177708	Rtn4rl1	reticulon 4 receptor-like 1	0	0	1	0	0	0	0	1	0	1	0
mmu-miR-495	MIMAT0003456	NM_177709	Tusc5	tumor suppressor candidate 5	0	0	1	0	0	0	0	1	0	1	0
mmu-miR-495	MIMAT0003456	NM_177718	1600021P15Rik	RIKEN cDNA 1600021P15 gene	0	0	1	0	0	0	0	1	0	1	0
mmu-miR-495	MIMAT0003456	NM_177741	Ppp1r3b	protein phosphatase 1, regulatory (inhibitor) subunit 3B	0	0	1	0	0	0	0	1	0	1	0
mmu-miR-495	MIMAT0003456	NM_177747	Zfp711	zinc finger protein 711	0	0	1	0	0	0	0	1	0	1	0
mmu-miR-495	MIMAT0003456	NM_177757	Kif26b	kinesin family member 26B	0	0	1	0	0	0	0	1	0	1	0
mmu-miR-495	MIMAT0003456	NM_177762	Aak1	AP2 associated kinase 1	0	0	1	0	0	0	0	1	0	1	0
mmu-miR-495	MIMAT0003456	NM_177769	Elmod1	ELMO domain containing 1	0	0	1	0	0	0	0	1	0	1	0
mmu-miR-495	MIMAT0003456	NM_177784	Klhl23	kelch-like 23 (Drosophila)	0	0	1	0	0	0	0	1	0	1	0
mmu-miR-495	MIMAT0003456	NM_177798	Frs2	fibroblast growth factor receptor substrate 2	0	0	1	0	0	0	0	1	0	1	0
mmu-miR-495	MIMAT0003456	NM_177687	Crebl2	cAMP responsive element binding protein-like 2	0	0	1	0	0	0	0	1	0	1	0
mmu-miR-495	MIMAT0003456	NM_177680	Ythdc1	YTH domain containing 1	0	0	1	0	0	0	0	1	0	1	0
mmu-miR-495	MIMAT0003456	NM_177670	Tmem69	transmembrane protein 69	0	0	1	0	0	0	0	1	0	1	0
mmu-miR-495	MIMAT0003456	NM_177464	D19Ertd386e	DNA segment, Chr 19, ERATO Doi 386, expressed	0	0	1	0	0	0	0	1	0	1	0
mmu-miR-495	MIMAT0003456	NM_177466	Rab11fip5	RAB11 family interacting protein 5 (class I)	0	0	1	0	0	0	0	1	0	1	0
mmu-miR-495	MIMAT0003456	NM_177474	D19Bwg1357e	DNA segment, Chr 19, Brigham & Women"s Genetics 1357 expressed	0	0	1	0	0	0	0	1	0	1	0
mmu-miR-495	MIMAT0003456	NM_177475	Zfp280b	zinc finger protein 280b	0	0	1	0	0	0	0	1	0	1	0
mmu-miR-495	MIMAT0003456	NM_177547	Sgk3	serum/glucocorticoid regulated kinase 3	0	0	1	0	0	0	0	1	0	1	0
mmu-miR-495	MIMAT0003456	NM_177578	A430090E18Rik	RIKEN cDNA A430090E18 gene	0	0	1	0	0	0	0	1	0	1	0
mmu-miR-495	MIMAT0003456	NM_177583	Aph1b	anterior pharynx defective 1b homolog (C. elegans)	0	0	1	0	0	0	0	1	0	1	0
mmu-miR-495	MIMAT0003456	NM_177619	Myst2	MYST histone acetyltransferase 2	0	0	1	0	0	0	0	1	0	1	0
mmu-miR-495	MIMAT0003456	NM_177625	Ttc5	tetratricopeptide repeat domain 5	0	0	1	0	0	0	0	1	0	1	0
mmu-miR-495	MIMAT0003456	NM_177639	Dlgap1	discs, large (Drosophila) homolog-associated protein 1	0	0	1	0	0	0	0	1	0	1	0
mmu-miR-495	MIMAT0003456	NM_177811	Zfp459	zinc finger protein 459	0	0	1	0	0	0	0	1	0	1	0
mmu-miR-495	MIMAT0003456	NM_177865	OTTMUSG00000008540	predicted gene, OTTMUSG00000008540	0	0	1	0	0	0	0	1	0	1	0
mmu-miR-495	MIMAT0003456	NM_178189	Hist1h2ac	histone cluster 1, H2ac	0	0	1	0	0	0	0	1	0	1	0
mmu-miR-495	MIMAT0003456	NM_178194	Hist1h2be	histone cluster 1, H2be	0	0	1	0	0	0	0	1	0	1	0
mmu-miR-495	MIMAT0003456	NM_178214	Hist2h2be	histone cluster 2, H2be	0	0	1	0	0	0	0	1	0	1	0
mmu-miR-495	MIMAT0003456	NM_178220	Arrb1	arrestin, beta 1	0	0	1	0	0	0	0	1	0	1	0
mmu-miR-495	MIMAT0003456	NM_178278	Caps2	calcyphosphine 2	0	0	1	0	0	0	0	1	0	1	0
mmu-miR-495	MIMAT0003456	NM_178309	Brip1	BRCA1 interacting protein C-terminal helicase 1	0	0	1	0	0	0	0	1	0	1	0
mmu-miR-495	MIMAT0003456	NM_178367	Dhx33	DEAH (Asp-Glu-Ala-His) box polypeptide 33	0	0	1	0	0	0	0	1	0	1	0
mmu-miR-495	MIMAT0003456	NM_178395	Zdhhc2	zinc finger, DHHC domain containing 2	0	0	1	0	0	0	0	1	0	1	0
mmu-miR-495	MIMAT0003456	NM_178403	Pus7	pseudouridylate synthase 7 homolog (S. cerevisiae)	0	0	1	0	0	0	0	1	0	1	0
mmu-miR-495	MIMAT0003456	NM_178405	Atp1a2	ATPase, Na+/K+ transporting, alpha 2 polypeptide	0	0	1	0	0	0	0	1	0	1	0
mmu-miR-495	MIMAT0003456	NM_178142	Lcorl	ligand dependent nuclear receptor corepressor-like	0	0	1	0	0	0	0	1	0	1	0
mmu-miR-495	MIMAT0003456	NM_178119	Centg2	centaurin, gamma 2	0	0	1	0	0	0	0	1	0	1	0
mmu-miR-495	MIMAT0003456	NM_178118	Dixdc1	DIX domain containing 1	0	0	1	0	0	0	0	1	0	1	0
mmu-miR-495	MIMAT0003456	NM_177899	D330038O06Rik	RIKEN cDNA D330038O06 gene	0	0	1	0	0	0	0	1	0	1	0
mmu-miR-495	MIMAT0003456	NM_177912	Gsdmc2	gasdermin C2	0	0	1	0	0	0	0	1	0	1	0
mmu-miR-495	MIMAT0003456	NM_178016	Pigk	phosphatidylinositol glycan anchor biosynthesis, class K	0	0	1	0	0	0	0	1	0	1	0
mmu-miR-495	MIMAT0003456	NM_178017	Hmgb2l1	high mobility group box 2-like 1	0	0	1	0	0	0	0	1	0	1	0
mmu-miR-495	MIMAT0003456	NM_178041	Eif5	eukaryotic translation initiation factor 5	0	0	1	0	0	0	0	1	0	1	0
mmu-miR-495	MIMAT0003456	NM_178045	Rassf4	Ras association (RalGDS/AF-6) domain family member 4	0	0	1	0	0	0	0	1	0	1	0
mmu-miR-495	MIMAT0003456	NM_178047	Prom2	prominin 2	0	0	1	0	0	0	0	1	0	1	0
mmu-miR-495	MIMAT0003456	NM_178050	Arl6ip2	ADP-ribosylation factor-like 6 interacting protein 2	0	0	1	0	0	0	0	1	0	1	0
mmu-miR-495	MIMAT0003456	NM_178055	Dnajb2	DnaJ (Hsp40) homolog, subfamily B, member 2	0	0	1	0	0	0	0	1	0	1	0
mmu-miR-495	MIMAT0003456	NM_178111	Trp53inp2	transformation related protein 53 inducible nuclear protein 2	0	0	1	0	0	0	0	1	0	1	0
mmu-miR-495	MIMAT0003456	NM_178417	BC050078	cDNA sequence BC050078	0	0	1	0	0	0	0	1	0	1	0
mmu-miR-495	MIMAT0003456	NM_175506	Adamts19	a disintegrin-like and metallopeptidase (reprolysin type) with thrombospondin type 1 motif, 19	0	0	1	0	0	0	0	1	0	1	0
mmu-miR-495	MIMAT0003456	NM_176837	Arhgap18	Rho GTPase activating protein 18	0	0	1	0	0	0	0	1	0	1	0
mmu-miR-495	MIMAT0003456	NM_176850	Bptf	bromodomain PHD finger transcription factor	0	0	1	0	0	0	0	1	0	1	0
mmu-miR-495	MIMAT0003456	NM_176912	Gpr77	G protein-coupled receptor 77	0	0	1	0	0	0	0	1	0	1	0
mmu-miR-495	MIMAT0003456	NM_176924	9530053A07Rik	RIKEN cDNA 9530053A07 gene	0	0	1	0	0	0	0	1	0	1	0
mmu-miR-495	MIMAT0003456	NM_176966	Fsd1l	fibronectin type III and SPRY domain containing 1-like	0	0	1	0	0	0	0	1	0	1	0
mmu-miR-495	MIMAT0003456	NM_176993	Mpzl3	myelin protein zero-like 3	0	0	1	0	0	0	0	1	0	1	0
mmu-miR-495	MIMAT0003456	NM_176999	Atp10b	ATPase, class V, type 10B	0	0	1	0	0	0	0	1	0	1	0
mmu-miR-495	MIMAT0003456	NM_177003	9630033F20Rik	RIKEN cDNA 9630033F20 gene	0	0	1	0	0	0	0	1	0	1	0
mmu-miR-495	MIMAT0003456	NM_177033	Vwc2	von Willebrand factor C domain containing 2	0	0	1	0	0	0	0	1	0	1	0
mmu-miR-495	MIMAT0003456	NM_177047	Auts2	autism susceptibility candidate 2	0	0	1	0	0	0	0	1	0	1	0
mmu-miR-495	MIMAT0003456	NM_176833	Ppm1f	protein phosphatase 1F (PP2C domain containing)	0	0	1	0	0	0	0	1	0	1	0
mmu-miR-495	MIMAT0003456	NM_176829	4931440F15Rik	RIKEN cDNA 4931440F15 gene	0	0	1	0	0	0	0	1	0	1	0
mmu-miR-495	MIMAT0003456	NM_175833	Cdv3	carnitine deficiency-associated gene expressed in ventricle 3	0	0	1	0	0	0	0	1	0	1	0
mmu-miR-495	MIMAT0003456	NM_175526	Clec1a	C-type lectin domain family 1, member a	0	0	1	0	0	0	0	1	0	1	0
mmu-miR-495	MIMAT0003456	NM_175531	Mrgprb2	MAS-related GPR, member B2	0	0	1	0	0	0	0	1	0	1	0
mmu-miR-495	MIMAT0003456	NM_175542	Rttn	rotatin	0	0	1	0	0	0	0	1	0	1	0
mmu-miR-495	MIMAT0003456	NM_175550	Ap4e1	adaptor-related protein complex AP-4, epsilon 1	0	0	1	0	0	0	0	1	0	1	0
mmu-miR-495	MIMAT0003456	NM_175565	Cdv3	carnitine deficiency-associated gene expressed in ventricle 3	0	0	1	0	0	0	0	1	0	1	0
mmu-miR-495	MIMAT0003456	NM_175632	Oscar	osteoclast associated receptor	0	0	1	0	0	0	0	1	0	1	0
mmu-miR-495	MIMAT0003456	NM_175647	Dmrta1	doublesex and mab-3 related transcription factor like family A1	0	0	1	0	0	0	0	1	0	1	0
mmu-miR-495	MIMAT0003456	NM_175649	Tnfrsf26	tumor necrosis factor receptor superfamily, member 26	0	0	1	0	0	0	0	1	0	1	0
mmu-miR-495	MIMAT0003456	NM_175651	Cnpy1	canopy 1 homolog (zebrafish)	0	0	1	0	0	0	0	1	0	1	0
mmu-miR-495	MIMAT0003456	NM_175731	Asah3	N-acylsphingosine amidohydrolase (alkaline ceramidase) 3	0	0	1	0	0	0	0	1	0	1	0
mmu-miR-495	MIMAT0003456	NM_177089	Tacc1	transforming, acidic coiled-coil containing protein 1	0	0	1	0	0	0	0	1	0	1	0
mmu-miR-495	MIMAT0003456	NM_177129	Cntn2	contactin 2	0	0	1	0	0	0	0	1	0	1	0
mmu-miR-495	MIMAT0003456	NM_177320	Pik3r5	phosphoinositide-3-kinase, regulatory subunit 5, p101	0	0	1	0	0	0	0	1	0	1	0
mmu-miR-495	MIMAT0003456	NM_177325	Tsr1	TSR1, 20S rRNA accumulation, homolog (yeast)	0	0	1	0	0	0	0	1	0	1	0
mmu-miR-495	MIMAT0003456	NM_177326	Pak2	p21 (CDKN1A)-activated kinase 2	0	0	1	0	0	0	0	1	0	1	0
mmu-miR-495	MIMAT0003456	NM_177328	Grm7	glutamate receptor, metabotropic 7	0	0	1	0	0	0	0	1	0	1	0
mmu-miR-495	MIMAT0003456	NM_177330	Ghsr	growth hormone secretagogue receptor	0	0	1	0	0	0	0	1	0	1	0
mmu-miR-495	MIMAT0003456	NM_177343	Camk1d	calcium/calmodulin-dependent protein kinase ID	0	0	1	0	0	0	0	1	0	1	0
mmu-miR-495	MIMAT0003456	NM_177364	Sh3pxd2b	SH3 and PX domains 2B	0	0	1	0	0	0	0	1	0	1	0
mmu-miR-495	MIMAT0003456	NM_177388	Slc41a2	solute carrier family 41, member 2	0	0	1	0	0	0	0	1	0	1	0
mmu-miR-495	MIMAT0003456	NM_177389	Mia3	melanoma inhibitory activity 3	0	0	1	1	0	0	0	0	0	1	0
mmu-miR-495	MIMAT0003456	NM_177391	C920005C14Rik	RIKEN cDNA C920005C14 gene	0	0	1	0	0	0	0	1	0	1	0
mmu-miR-495	MIMAT0003456	NM_177282	Mical2	microtubule associated monoxygenase, calponin and LIM domain containing 2	0	0	1	0	0	0	0	1	0	1	0
mmu-miR-495	MIMAT0003456	NM_177280	B230206H07Rik	RIKEN cDNA B230206H07 gene	0	0	1	0	0	0	0	1	0	1	0
mmu-miR-495	MIMAT0003456	NM_177266	Gfm2	G elongation factor, mitochondrial 2	0	0	1	1	0	0	0	0	0	1	0
mmu-miR-495	MIMAT0003456	NM_177162	9930032O22Rik	RIKEN cDNA 9930032O22 gene	0	0	1	0	0	0	0	1	0	1	0
mmu-miR-495	MIMAT0003456	NM_177167	Ppm1e	protein phosphatase 1E (PP2C domain containing)	0	0	1	0	0	0	0	1	0	1	0
mmu-miR-495	MIMAT0003456	NM_177191	Sycp2	synaptonemal complex protein 2	0	0	1	0	0	0	0	1	0	1	0
mmu-miR-495	MIMAT0003456	NM_177192	D030011O10Rik	RIKEN cDNA D030011O10 gene	0	0	1	0	0	0	0	1	0	1	0
mmu-miR-495	MIMAT0003456	NM_177231	Arrb1	arrestin, beta 1	0	0	1	0	0	0	0	1	0	1	0
mmu-miR-495	MIMAT0003456	NM_177233	C130034I18Rik	RIKEN cDNA C130034I18 gene	0	0	1	0	0	0	0	1	0	1	0
mmu-miR-495	MIMAT0003456	NM_177235	B230209C24Rik	RIKEN cDNA B230209C24 gene	0	0	1	1	0	0	0	1	0	0	0
mmu-miR-495	MIMAT0003456	NM_175494	Zfp367	zinc finger protein 367	0	0	1	0	0	0	0	1	0	1	0
mmu-miR-495	MIMAT0003456	NM_177248	A630005I04Rik	RIKEN cDNA A630005I04 gene	0	0	1	0	0	0	0	1	0	1	0
mmu-miR-495	MIMAT0003456	NM_177265	6330512M04Rik	RIKEN cDNA 6330512M04 gene	0	0	1	0	0	0	0	1	0	1	0
mmu-miR-495	MIMAT0003456	NM_177393	Nalcn	sodium leak channel, non-selective	0	0	1	0	0	0	0	1	0	1	0
mmu-miR-495	MIMAT0003456	NM_178446	Rbm47	RNA binding motif protein 47	0	0	1	0	0	0	0	1	0	1	0
mmu-miR-495	MIMAT0003456	NM_181401	Tmem64	transmembrane protein 64	0	0	1	0	0	0	0	1	0	1	0
mmu-miR-495	MIMAT0003456	NM_183037	Trim46	tripartite motif-containing 46	0	0	1	0	0	0	0	1	0	1	0
mmu-miR-495	MIMAT0003456	NM_183064	Fgf12	fibroblast growth factor 12	0	0	1	0	0	0	0	1	0	1	0
mmu-miR-495	MIMAT0003456	NM_183146	A530054K11Rik	RIKEN cDNA A530054K11 gene	0	0	1	0	0	0	0	1	0	1	0
mmu-miR-495	MIMAT0003456	NM_183160	E030010A14Rik	RIKEN cDNA E030010A14 gene	0	0	1	0	0	0	0	1	0	1	0
mmu-miR-495	MIMAT0003456	NM_183174	Homez	homeodomain leucine zipper-encoding gene	0	0	1	0	0	0	0	1	0	1	0
mmu-miR-495	MIMAT0003456	NM_183185	Zfp300	zinc finger protein 300	0	0	1	0	0	0	0	1	0	1	0
mmu-miR-495	MIMAT0003456	NM_183187	BC055107	cDNA sequence BC055107	0	0	1	0	0	0	0	1	0	1	0
mmu-miR-495	MIMAT0003456	NM_183193	Foxi2	forkhead box I2	0	0	1	0	0	0	0	1	0	1	0
mmu-miR-495	MIMAT0003456	NM_183221	Fat4	FAT tumor suppressor homolog 4 (Drosophila)	0	0	1	0	0	0	0	1	0	1	0
mmu-miR-495	MIMAT0003456	NM_183224	7530404M11Rik	RIKEN cDNA 7530404M11 gene	0	0	1	0	0	0	0	1	0	1	0
mmu-miR-495	MIMAT0003456	NM_183029	Igf2bp2	insulin-like growth factor 2 mRNA binding protein 2	0	0	1	0	0	0	0	1	0	1	0
mmu-miR-495	MIMAT0003456	NM_183027	Ap1s3	adaptor-related protein complex AP-1, sigma 3	0	0	1	0	0	0	0	1	0	1	0
mmu-miR-495	MIMAT0003456	NM_182995	6330503K22Rik	RIKEN cDNA 6330503K22 gene	0	0	1	0	0	0	0	1	0	1	0
mmu-miR-495	MIMAT0003456	NM_181409	Mtmr11	myotubularin related protein 11	0	0	1	0	0	0	0	1	0	1	0
mmu-miR-495	MIMAT0003456	NM_181415	Atrnl1	attractin like 1	0	0	1	0	0	0	0	1	0	1	0
mmu-miR-495	MIMAT0003456	NM_181419	BC050092	cDNA sequence BC050092	0	0	1	0	0	0	0	1	0	1	0
mmu-miR-495	MIMAT0003456	NM_181541	Caprin2	caprin family member 2	0	0	1	0	0	0	0	1	0	1	0
mmu-miR-495	MIMAT0003456	NM_181585	Pik3r3	phosphatidylinositol 3 kinase, regulatory subunit, polypeptide 3 (p55)	0	0	1	0	0	0	0	1	0	1	0
mmu-miR-495	MIMAT0003456	NM_181649	2310002B06Rik	RIKEN cDNA 2310002B06 gene	0	0	1	0	0	0	0	1	0	1	0
mmu-miR-495	MIMAT0003456	NM_181650	Prdm4	PR domain containing 4	0	0	1	0	0	0	0	1	0	1	0
mmu-miR-495	MIMAT0003456	NM_181816	Ccdc67	coiled-coil domain containing 67	0	0	1	0	0	0	0	1	0	1	0
mmu-miR-495	MIMAT0003456	NM_181857	Poln	DNA polymerase N	0	0	1	0	0	0	0	1	0	1	0
mmu-miR-495	MIMAT0003456	NM_182939	Ppp4r2	protein phosphatase 4, regulatory subunit 2	0	0	1	0	0	0	0	1	0	1	0
mmu-miR-495	MIMAT0003456	NM_183261	Nr2f2	nuclear receptor subfamily 2, group F, member 2	0	0	1	0	0	0	0	1	0	1	0
mmu-miR-495	MIMAT0003456	NM_183262	Stk35	serine/threonine kinase 35	0	0	1	0	0	0	0	1	0	1	0
mmu-miR-495	MIMAT0003456	NM_197943	Sgsm2	small G protein signaling modulator 2	0	0	1	0	0	0	0	1	0	1	0
mmu-miR-495	MIMAT0003456	NM_197987	Trim37	tripartite motif-containing 37	0	0	1	0	0	0	0	1	0	1	0
mmu-miR-495	MIMAT0003456	NM_198006	6330578E17Rik	RIKEN cDNA 6330578E17 gene	0	0	1	0	0	0	0	1	0	1	0
mmu-miR-495	MIMAT0003456	NM_198018	Abr	active BCR-related gene	0	0	1	0	0	0	0	1	0	1	0
mmu-miR-495	MIMAT0003456	NM_198023	Rcor1	REST corepressor 1	0	0	1	0	0	0	0	1	0	1	0
mmu-miR-495	MIMAT0003456	NM_198029	Fermt1	fermitin family homolog 1 (Drosophila)	0	0	1	0	0	0	0	1	0	1	0
mmu-miR-495	MIMAT0003456	NM_198035	Zbtb39	zinc finger and BTB domain containing 39	0	0	1	0	0	0	0	1	0	1	0
mmu-miR-495	MIMAT0003456	NM_198105	ORF34	open reading frame 34	0	0	1	0	0	0	0	1	0	1	0
mmu-miR-495	MIMAT0003456	NM_198110	Gnl3l	guanine nucleotide binding protein-like 3 (nucleolar)-like	0	0	1	0	0	0	0	1	0	1	0
mmu-miR-495	MIMAT0003456	NM_198117	Pcdha2	protocadherin alpha 2	0	0	1	0	0	0	0	1	0	1	0
mmu-miR-495	MIMAT0003456	NM_194464	Mrvi1	MRV integration site 1	0	0	1	0	0	0	0	1	0	1	0
mmu-miR-495	MIMAT0003456	NM_194340	C330019G07Rik	RIKEN cDNA C330019G07 gene	0	0	1	0	0	0	0	1	0	1	0
mmu-miR-495	MIMAT0003456	NM_194335	Naif1	nuclear apoptosis inducing factor 1	0	0	1	0	0	0	0	1	0	1	0
mmu-miR-495	MIMAT0003456	NM_183285	Kctd2	potassium channel tetramerisation domain containing 2	0	0	1	0	0	0	0	1	0	1	0
mmu-miR-495	MIMAT0003456	NM_183290	4921517D22Rik	RIKEN cDNA 4921517D22 gene	0	0	1	0	0	0	0	1	0	1	0
mmu-miR-495	MIMAT0003456	NM_183294	Cdkl1	cyclin-dependent kinase-like 1 (CDC2-related kinase)	0	0	1	0	0	0	0	1	0	1	0
mmu-miR-495	MIMAT0003456	NM_183312	Dmn	desmuslin	0	0	1	0	0	0	0	1	0	1	0
mmu-miR-495	MIMAT0003456	NM_183320	EG331529	predicted gene, EG331529	0	0	1	1	0	0	0	0	0	1	0
mmu-miR-495	MIMAT0003456	NM_183355	Pbx1	pre B-cell leukemia transcription factor 1	0	0	1	0	0	0	0	1	0	1	0
mmu-miR-495	MIMAT0003456	NM_183366	Adam28	a disintegrin and metallopeptidase domain 28	0	0	1	0	0	0	0	1	0	1	0
mmu-miR-495	MIMAT0003456	NM_183424	Qrfp	pyroglutamylated RFamide peptide	0	0	1	0	0	0	0	1	0	1	0
mmu-miR-495	MIMAT0003456	NM_194263	Tbx20	T-box 20	0	0	1	0	0	0	0	1	0	1	0
mmu-miR-495	MIMAT0003456	NM_194334	Tbc1d2b	TBC1 domain family, member 2B	0	0	1	0	0	0	0	1	0	1	0
mmu-miR-495	MIMAT0003456	NM_198171	BC015286	cDNA sequence BC015286	0	0	1	0	0	0	0	1	0	1	0
mmu-miR-495	MIMAT0003456	NM_178601	Imp4	IMP4, U3 small nucleolar ribonucleoprotein, homolog (yeast)	0	0	1	0	0	0	0	1	0	1	0
mmu-miR-495	MIMAT0003456	NM_178692	C130074G19Rik	RIKEN cDNA C130074G19 gene	0	0	1	0	0	0	0	1	0	1	0
mmu-miR-495	MIMAT0003456	NM_178696	Slc25a44	solute carrier family 25, member 44	0	0	1	0	0	0	0	1	0	1	0
mmu-miR-495	MIMAT0003456	NM_178704	Dpy19l3	dpy-19-like 3 (C. elegans)	0	0	1	0	0	0	0	1	0	1	0
mmu-miR-495	MIMAT0003456	NM_178705	Luzp2	leucine zipper protein 2	0	0	1	0	0	0	0	1	0	1	0
mmu-miR-495	MIMAT0003456	NM_178708	Pcid2	PCI domain containing 2	0	0	1	0	0	0	0	1	0	1	0
mmu-miR-495	MIMAT0003456	NM_178719	Smcr7l	Smith-Magenis syndrome chromosome region, candidate 7-like (human)	0	0	1	0	0	0	0	1	0	1	0
mmu-miR-495	MIMAT0003456	NM_178728	Napepld	N-acyl phosphatidylethanolamine phospholipase D	0	0	1	0	0	0	0	1	0	1	0
mmu-miR-495	MIMAT0003456	NM_178732	Zfp324	zinc finger protein 324	0	0	1	0	0	0	0	1	0	1	0
mmu-miR-495	MIMAT0003456	NM_178740	Slitrk4	SLIT and NTRK-like family, member 4	0	0	1	0	0	0	0	1	0	1	0
mmu-miR-495	MIMAT0003456	NM_178746	Slc38a9	solute carrier family 38, member 9	0	0	1	0	0	0	0	1	0	1	0
mmu-miR-495	MIMAT0003456	NM_178690	Rab3gap1	RAB3 GTPase activating protein subunit 1	0	0	1	0	0	0	0	1	0	1	0
mmu-miR-495	MIMAT0003456	NM_178684	Mapk1ip1l	mitogen-activated protein kinase 1 interacting protein 1-like	0	0	1	0	0	0	0	1	0	1	0
mmu-miR-495	MIMAT0003456	NM_178673	Fstl5	follistatin-like 5	0	0	1	0	0	0	0	1	0	1	0
mmu-miR-495	MIMAT0003456	NM_178604	Txnl4a	thioredoxin-like 4A	0	0	1	0	0	0	0	1	0	1	0
mmu-miR-495	MIMAT0003456	NM_178606	Reep3	receptor accessory protein 3	0	0	1	0	0	0	0	1	0	1	0
mmu-miR-495	MIMAT0003456	NM_178607	Rnf24	ring finger protein 24	0	0	1	0	0	0	0	1	0	1	0
mmu-miR-495	MIMAT0003456	NM_178617	Necab1	N-terminal EF-hand calcium binding protein 1	0	0	1	0	0	0	0	1	0	1	0
mmu-miR-495	MIMAT0003456	NM_178627	Poldip3	polymerase (DNA-directed), delta interacting protein 3	0	0	1	0	0	0	0	1	0	1	0
mmu-miR-495	MIMAT0003456	NM_178628	Spg3a	spastic paraplegia 3A homolog (human)	0	0	1	0	0	0	0	1	0	1	0
mmu-miR-495	MIMAT0003456	NM_178646	Tigd5	tigger transposable element derived 5	0	0	1	0	0	0	0	1	0	1	0
mmu-miR-495	MIMAT0003456	NM_178648	Ubxd6	UBX domain containing 6	0	0	1	0	0	0	0	1	0	1	0
mmu-miR-495	MIMAT0003456	NM_178656	A530088H08Rik	RIKEN cDNA A530088H08 gene	0	0	1	0	0	0	0	1	0	1	0
mmu-miR-495	MIMAT0003456	NM_178662	Atcay	ataxia, cerebellar, Cayman type homolog (human)	0	0	1	0	0	0	0	1	0	1	0
mmu-miR-495	MIMAT0003456	NM_178750	Ss18l1	synovial sarcoma translocation gene on chromosome 18-like 1	0	0	1	0	0	0	0	1	0	1	0
mmu-miR-495	MIMAT0003456	NM_178764	B930006L02Rik	RIKEN cDNA B930006L02 gene	0	0	1	0	0	0	0	1	0	1	0
mmu-miR-495	MIMAT0003456	NM_178892	Tiparp	TCDD-inducible poly(ADP-ribose) polymerase	0	0	1	0	0	0	0	1	0	1	0
mmu-miR-495	MIMAT0003456	NM_178906	AI593442	expressed sequence AI593442	0	0	1	0	0	0	0	1	0	1	0
mmu-miR-495	MIMAT0003456	NM_178907	Mapkapk3	mitogen-activated protein kinase-activated protein kinase 3	0	0	1	0	0	0	0	1	0	1	0
mmu-miR-495	MIMAT0003456	NM_178920	Mal2	mal, T-cell differentiation protein 2	0	0	1	0	0	0	0	1	0	1	0
mmu-miR-495	MIMAT0003456	NM_178922	Hic2	hypermethylated in cancer 2	0	0	1	0	0	0	0	1	0	1	0
mmu-miR-495	MIMAT0003456	NM_180600	Ube2q2	ubiquitin-conjugating enzyme E2Q (putative) 2	0	0	1	0	0	0	0	1	0	1	0
mmu-miR-495	MIMAT0003456	NM_181274	1200003I07Rik	RIKEN cDNA 1200003I07 gene	0	0	1	0	0	0	0	1	0	1	0
mmu-miR-495	MIMAT0003456	NM_181344	C1rl	complement component 1, r subcomponent-like	0	0	1	0	0	0	0	1	0	1	0
mmu-miR-495	MIMAT0003456	NM_181347	Dennd1b	DENN/MADD domain containing 1B	0	0	1	0	0	0	0	1	0	1	0
mmu-miR-495	MIMAT0003456	NM_181397	Rftn1	raftlin lipid raft linker 1	0	0	1	0	0	0	0	1	0	1	0
mmu-miR-495	MIMAT0003456	NM_178882	D2hgdh	D-2-hydroxyglutarate dehydrogenase	0	0	1	0	0	0	0	1	0	1	0
mmu-miR-495	MIMAT0003456	NM_178811	Ttc15	tetratricopeptide repeat domain 15	0	0	1	0	0	0	0	1	0	1	0
mmu-miR-495	MIMAT0003456	NM_178803	Aebp2	AE binding protein 2	0	0	1	0	0	0	0	1	0	1	0
mmu-miR-495	MIMAT0003456	NM_178766	Slc25a40	solute carrier family 25, member 40	0	0	1	0	0	0	0	1	0	1	0
mmu-miR-495	MIMAT0003456	NM_178768	C230095G01Rik	RIKEN cDNA C230095G01 gene	0	0	1	0	0	0	0	1	0	1	0
mmu-miR-495	MIMAT0003456	NM_178774	Prr18	proline rich region 18	0	0	1	0	0	0	0	1	0	1	0
mmu-miR-495	MIMAT0003456	NM_178775	Rps6kc1	ribosomal protein S6 kinase polypeptide 1	0	0	1	0	0	0	0	1	0	1	0
mmu-miR-495	MIMAT0003456	NM_178779	Rnf152	ring finger protein 152	0	0	1	0	0	0	0	1	0	1	0
mmu-miR-495	MIMAT0003456	NM_178786	9530098N22Rik	RIKEN cDNA 9530098N22 gene	0	0	1	0	0	0	0	1	0	1	0
mmu-miR-495	MIMAT0003456	NM_178788	Dctd	dCMP deaminase	0	0	1	0	0	0	0	1	0	1	0
mmu-miR-495	MIMAT0003456	NM_178789	Tmem117	transmembrane protein 117	0	0	1	0	0	0	0	1	0	1	0
mmu-miR-495	MIMAT0003456	NM_178797	Far2	fatty acyl CoA reductase 2	0	0	1	0	0	0	0	1	0	1	0
mmu-miR-495	MIMAT0003456	NM_178802	Trim65	tripartite motif-containing 65	0	0	1	0	0	0	0	1	0	1	0
mmu-miR-495	MIMAT0003456	NM_181399	Usp6nl	USP6 N-terminal like	0	0	1	0	0	0	0	1	0	1	0
mmu-miR-495	MIMAT0003456	NM_001001449	AF067063	cDNA sequence AF067063	0	0	1	1	0	0	0	0	0	1	0
mmu-miR-495	MIMAT0003456	NM_001001798	Atp11c	Atpase, class VI, type 11C	0	0	1	0	0	0	0	1	0	1	0
mmu-miR-495	MIMAT0003456	NM_001001892	H2-K1	histocompatibility 2, K1, K region	0	0	1	0	0	0	0	1	0	1	0
mmu-miR-495	MIMAT0003456	NM_001001980	Limch1	LIM and calponin homology domains 1	0	0	1	0	0	0	0	1	0	1	0
mmu-miR-495	MIMAT0003456	NM_001001985	Nat8l	N-acetyltransferase 8-like	0	0	1	0	0	0	0	1	0	1	0
mmu-miR-495	MIMAT0003456	NM_001001986	8430427H17Rik	RIKEN cDNA 8430427H17 gene	0	0	1	0	0	0	0	1	0	1	0
mmu-miR-495	MIMAT0003456	NM_001002238	Tdrd1	tudor domain containing 1	0	0	1	0	0	0	0	1	0	1	0
mmu-miR-495	MIMAT0003456	NM_001002240	Tdrd1	tudor domain containing 1	0	0	1	0	0	0	0	1	0	1	0
mmu-miR-495	MIMAT0003456	NM_001002894	Nlrp14	NLR family, pyrin domain containing 14	0	0	1	0	0	0	0	1	0	1	0
mmu-miR-495	MIMAT0003456	NM_001002927	Penk1	preproenkephalin 1	0	0	1	0	0	0	0	1	0	1	0
mmu-miR-495	MIMAT0003456	NM_001003671	Pcdhac1	protocadherin alpha subfamily C, 1	0	0	1	0	0	0	0	1	0	1	0
mmu-miR-495	MIMAT0003456	NM_001003672	Pcdhac2	protocadherin alpha subfamily C, 2	0	0	1	0	0	0	0	1	0	1	0
mmu-miR-495	MIMAT0003456	NM_001003719	Garnl1	GTPase activating RANGAP domain-like 1	0	0	1	0	0	0	0	1	0	1	0
mmu-miR-495	MIMAT0003456	NM_001003815	Epb4.1l1	erythrocyte protein band 4.1-like 1	0	0	1	0	0	0	0	1	0	1	0
mmu-miR-495	MIMAT0003456	NM_001003909	Ankib1	ankyrin repeat and IBR domain containing 1	0	0	1	0	0	0	0	1	0	1	0
mmu-miR-495	MIMAT0003456	NM_001003946	Als2cr13	amyotrophic lateral sclerosis 2 (juvenile) chromosome region, candidate 13 (human)	0	0	1	0	0	0	0	1	0	1	0
mmu-miR-495	MIMAT0003456	NM_001004151	Rtp1	receptor transporter protein 1	0	0	1	0	0	0	0	1	0	1	0
mmu-miR-495	MIMAT0003456	NM_001004153	AU018091	expressed sequence AU018091	0	0	1	0	0	0	0	1	0	1	0
mmu-miR-495	MIMAT0003456	NM_001004184	Slc28a1	solute carrier family 28 (sodium-coupled nucleoside transporter), member 1	0	0	1	0	0	0	0	1	0	1	0
mmu-miR-495	MIMAT0003456	NM_001004190	Zfp560	zinc finger protein 560	0	0	1	0	0	0	0	1	0	1	0
mmu-miR-495	MIMAT0003456	NM_001004293	Amigo1	adhesion molecule with Ig like domain 1	0	0	1	0	0	0	0	1	0	1	0
mmu-miR-495	MIMAT0003456	NM_001004364	Ddef2	development and differentiation enhancing factor 2	0	0	1	0	0	0	0	1	0	1	0
mmu-miR-495	MIMAT0003456	NM_001004761	Gpr158	G protein-coupled receptor 158	0	0	1	0	0	0	0	1	0	1	0
mmu-miR-495	MIMAT0003456	NM_001005420	Gm347	gene model 347, (NCBI)	0	0	1	0	0	0	0	1	0	1	0
mmu-miR-495	MIMAT0003456	NM_001005423	Mreg	melanoregulin	0	0	1	0	0	0	0	1	0	1	0
mmu-miR-495	MIMAT0003456	NM_001005507	Smg7	Smg-7 homolog, nonsense mediated mRNA decay factor (C. elegans)	0	0	1	0	0	0	0	1	0	1	0
mmu-miR-495	MIMAT0003456	NM_001005605	Aebp2	AE binding protein 2	0	0	1	0	0	0	0	1	0	1	0
mmu-miR-495	MIMAT0003456	NM_001006664	Epb4.1l1	erythrocyte protein band 4.1-like 1	0	0	1	0	0	0	0	1	0	1	0
mmu-miR-495	MIMAT0003456	NM_001007154	Phactr3	phosphatase and actin regulator 3	0	0	1	0	0	0	0	1	0	1	0
mmu-miR-495	MIMAT0003456	NM_001007465	Rffl	ring finger and FYVE like domain containing protein	0	0	1	0	0	0	0	1	0	1	0
mmu-miR-495	MIMAT0003456	NM_001008420	Cdh12	cadherin 12	0	0	1	0	0	0	0	1	0	1	0
mmu-miR-495	MIMAT0003456	NM_001008423	Gm1568	gene model 1568, (NCBI)	0	0	1	0	0	0	0	1	0	1	0
mmu-miR-495	MIMAT0003456	NM_001008506	Zc3h14	zinc finger CCCH type containing 14	0	0	1	0	0	0	0	1	0	1	0
mmu-miR-495	MIMAT0003456	NM_001008702	Dab2	disabled homolog 2 (Drosophila)	0	0	1	0	0	0	0	1	0	1	0
mmu-miR-495	MIMAT0003456	NM_001009818	Sept11	septin 11	0	0	1	0	0	0	0	1	0	1	0
mmu-miR-495	MIMAT0003456	NM_001010826	Kctd14	potassium channel tetramerisation domain containing 14	0	0	1	0	0	0	0	1	0	1	0
mmu-miR-495	MIMAT0003456	NM_001010833	Mdc1	mediator of DNA damage checkpoint 1	0	0	1	0	0	0	0	1	0	1	0
mmu-miR-495	MIMAT0003456	NM_001010834	Slc10a5	solute carrier family 10 (sodium/bile acid cotransporter family), member 5	0	0	1	0	0	0	0	1	0	1	0
mmu-miR-495	MIMAT0003456	NM_001010941	Gpr12	G-protein coupled receptor 12	0	0	1	1	0	0	0	1	0	0	0
mmu-miR-495	MIMAT0003456	NM_001011800	Olfr212	olfactory receptor 212	0	0	1	0	0	0	0	1	0	1	0
mmu-miR-495	MIMAT0003456	NM_001012309	Ccdc55	coiled-coil domain containing 55	0	0	1	0	0	0	0	1	0	1	0
mmu-miR-495	MIMAT0003456	NM_001012325	Zfp708	zinc finger protein 708	0	0	1	0	0	0	0	1	0	1	0
mmu-miR-495	MIMAT0003456	NM_001012434	Kctd14	potassium channel tetramerisation domain containing 14	0	0	1	0	0	0	0	1	0	1	0
mmu-miR-495	MIMAT0003456	NM_001012448	Zfp708	zinc finger protein 708	0	0	1	0	0	0	0	1	0	1	0
mmu-miR-495	MIMAT0003456	NM_001012450	Ankrd6	ankyrin repeat domain 6	0	0	1	0	0	0	0	1	0	1	0
mmu-miR-495	MIMAT0003456	NM_001012451	Ankrd6	ankyrin repeat domain 6	0	0	1	0	0	0	0	1	0	1	0
mmu-miR-495	MIMAT0003456	NM_001012518	Ehmt1	euchromatic histone methyltransferase 1	0	0	1	0	0	0	0	1	0	1	0
mmu-miR-495	MIMAT0003456	NM_001013379	D10627	cDNA sequence D10627	0	0	1	0	0	0	0	1	0	1	0
mmu-miR-495	MIMAT0003456	NM_001013749	Tmem151b	transmembrane protein 151B	0	0	1	0	0	0	0	1	0	1	0
mmu-miR-495	MIMAT0003456	NM_001013753	Pcdh17	protocadherin 17	0	0	1	0	0	0	0	1	0	1	0
mmu-miR-495	MIMAT0003456	NM_001013786	Zfp187	zinc finger protein 187	0	0	1	0	0	0	0	1	0	1	0
mmu-miR-495	MIMAT0003456	NM_001017393	MGC107098	similar to spermiogenesis specific transcript on the Y 2	0	0	1	1	0	0	0	0	0	1	0
mmu-miR-495	MIMAT0003456	NM_001017983	Foxred2	FAD-dependent oxidoreductase domain containing 2	0	0	1	0	0	0	0	1	0	1	0
mmu-miR-495	MIMAT0003456	NM_001024137	Pla2g4d	phospholipase A2, group IVD	0	0	1	0	0	0	0	1	0	1	0
mmu-miR-495	MIMAT0003456	NM_001024622	Pcnp	PEST proteolytic signal containing nuclear protein	0	0	1	1	0	0	0	1	0	0	0
mmu-miR-495	MIMAT0003456	NM_001024705	Prpmp5	proline-rich protein MP5	0	0	1	1	0	0	0	1	0	0	0
mmu-miR-495	MIMAT0003456	NM_001024720	Hmcn1	hemicentin 1	0	0	1	0	0	0	0	1	0	1	0
mmu-miR-495	MIMAT0003456	NM_001024837	Adarb1	adenosine deaminase, RNA-specific, B1	0	0	1	0	0	0	0	1	0	1	0
mmu-miR-495	MIMAT0003456	NM_001024918	Rfx4	regulatory factor X, 4 (influences HLA class II expression)	0	0	1	0	0	0	0	1	0	1	0
mmu-miR-495	MIMAT0003456	NM_001024927	Pitpnm3	PITPNM family member 3	0	0	1	0	0	0	0	1	0	1	0
mmu-miR-495	MIMAT0003456	NM_001025067	Lrig2	leucine-rich repeats and immunoglobulin-like domains 2	0	0	1	0	0	0	0	1	0	1	0
mmu-miR-495	MIMAT0003456	NM_001025305	Tcfap2b	transcription factor AP-2 beta	0	0	1	0	0	0	0	1	0	1	0
mmu-miR-495	MIMAT0003456	NM_001025372	Adcyap1r1	adenylate cyclase activating polypeptide 1 receptor 1	0	0	1	0	0	0	0	1	0	1	0
mmu-miR-495	MIMAT0003456	NM_001025387	Brd2	bromodomain containing 2	0	0	1	0	0	0	0	1	0	1	0
mmu-miR-495	MIMAT0003456	NM_001025428	Spag9	sperm associated antigen 9	0	0	1	0	0	0	0	1	0	1	0
mmu-miR-495	MIMAT0003456	NM_001025429	Spag9	sperm associated antigen 9	0	0	1	0	0	0	0	1	0	1	0
mmu-miR-495	MIMAT0003456	NM_001025430	Spag9	sperm associated antigen 9	0	0	1	0	0	0	0	1	0	1	0
mmu-miR-495	MIMAT0003456	NM_001025431	Btbd3	BTB (POZ) domain containing 3	0	0	1	0	0	0	0	1	0	1	0
mmu-miR-495	MIMAT0003456	NM_001025439	Camk2d	calcium/calmodulin-dependent protein kinase II, delta	0	0	1	0	0	0	0	1	0	1	0
mmu-miR-495	MIMAT0003456	NM_001025559	Sox6	SRY-box containing gene 6	0	0	1	0	0	0	0	1	0	1	0
mmu-miR-495	MIMAT0003456	NM_001025566	Chka	choline kinase alpha	0	0	1	0	0	0	0	1	0	1	0
mmu-miR-495	MIMAT0003456	NM_001025568	Pde1c	phosphodiesterase 1C	0	0	1	0	0	0	0	1	0	1	0
mmu-miR-495	MIMAT0003456	NM_001025613	Otud7b	OTU domain containing 7B	0	0	1	0	0	0	0	1	0	1	0
mmu-miR-495	MIMAT0003456	NM_001025614	Otud7b	OTU domain containing 7B	0	0	1	0	0	0	0	1	0	1	0
mmu-miR-495	MIMAT0003456	NM_001029836	Npnt	nephronectin	0	0	1	0	0	0	0	1	0	1	0
mmu-miR-495	MIMAT0003456	NM_001029850	Magi1	membrane associated guanylate kinase, WW and PDZ domain containing 1	0	0	1	0	0	0	0	1	0	1	0
mmu-miR-495	MIMAT0003456	NM_001029890	Mex3a	mex3 homolog A (C. elegans)	0	0	1	0	0	0	0	1	0	1	0
mmu-miR-495	MIMAT0003456	NM_001029930	ENSMUSG00000068790	predicted gene, ENSMUSG00000068790	0	0	1	1	0	0	0	0	0	1	0
mmu-miR-495	MIMAT0003456	NM_001029936	Specc1	sperm antigen with calponin homology and coiled-coil domains 1	0	0	1	0	0	0	0	1	0	1	0
mmu-miR-495	MIMAT0003456	NM_001030293	Spry3	sprouty homolog 3 (Drosophila)	0	0	1	1	0	0	0	0	0	1	0
mmu-miR-495	MIMAT0003456	NM_001033042	AI595366	expressed sequence AI595366	0	0	1	0	0	0	0	1	0	1	0
mmu-miR-495	MIMAT0003456	NM_001033156	Fbxo33	F-box protein 33	0	0	1	0	0	0	0	1	0	1	0
mmu-miR-495	MIMAT0003456	NM_001033168	1700066B19Rik	RIKEN cDNA 1700066B19 gene	0	0	1	0	0	0	0	1	0	1	0
mmu-miR-495	MIMAT0003456	NM_001033174	Osbp	oxysterol binding protein	0	0	1	0	0	0	0	1	0	1	0
mmu-miR-495	MIMAT0003456	NM_001033175	Cln6	ceroid-lipofuscinosis, neuronal 6	0	0	1	0	0	0	0	1	0	1	0
mmu-miR-495	MIMAT0003456	NM_001033185	1700084C01Rik	RIKEN cDNA 1700084C01 gene	0	0	1	0	0	0	0	1	0	1	0
mmu-miR-495	MIMAT0003456	NM_001033191	Ard1b	ARD1 homolog B (S. cerevisiae)	0	0	1	0	0	0	0	1	0	1	0
mmu-miR-495	MIMAT0003456	NM_001033205	Zfp575	zinc finger protein 575	0	0	1	0	0	0	0	1	0	1	0
mmu-miR-495	MIMAT0003456	NM_001033208	AA407270	expressed sequence AA407270	0	0	1	0	0	0	0	1	0	1	0
mmu-miR-495	MIMAT0003456	NM_001033217	Prickle1	prickle like 1 (Drosophila)	0	0	1	0	0	0	0	1	0	1	0
mmu-miR-495	MIMAT0003456	NM_001033223	Lin7a	lin-7 homolog A (C. elegans)	0	0	1	0	0	0	0	1	0	1	0
mmu-miR-495	MIMAT0003456	NM_001033258	D10Bwg1379e	DNA segment, Chr 10, Brigham & Women"s Genetics 1379 expressed	0	0	1	0	0	0	0	1	0	1	0
mmu-miR-495	MIMAT0003456	NM_001033271	Tmem55b	transmembrane protein 55b	0	0	1	0	0	0	0	1	0	1	0
mmu-miR-495	MIMAT0003456	NM_001033273	5031439G07Rik	RIKEN cDNA 5031439G07 gene	0	0	1	0	0	0	0	1	0	1	0
mmu-miR-495	MIMAT0003456	NM_001033279	D17Wsu92e	DNA segment, Chr 17, Wayne State University 92, expressed	0	0	1	0	0	0	0	1	0	1	0
mmu-miR-495	MIMAT0003456	NM_001033300	Gmps	guanine monphosphate synthetase	0	0	1	0	0	0	0	1	0	1	0
mmu-miR-495	MIMAT0003456	NM_001033304	5330417C22Rik	RIKEN cDNA 5330417C22 gene	0	0	1	0	0	0	0	1	0	1	0
mmu-miR-495	MIMAT0003456	NM_001033329	Arhgef9	Cdc42 guanine nucleotide exchange factor (GEF) 9	0	0	1	0	0	0	0	1	0	1	0
mmu-miR-495	MIMAT0003456	NM_001033330	Frmpd4	FERM and PDZ domain containing 4	0	0	1	0	0	0	0	1	0	1	0
mmu-miR-495	MIMAT0003456	NM_001033347	D430041D05Rik	RIKEN cDNA D430041D05 gene	0	0	1	0	0	0	0	1	0	1	0
mmu-miR-495	MIMAT0003456	NM_001033360	Gpr101	G protein-coupled receptor 101	0	0	1	0	0	0	0	1	0	1	0
mmu-miR-495	MIMAT0003456	NM_001033428	Gm854	gene model 854, (NCBI)	0	0	1	0	0	0	0	1	0	1	0
mmu-miR-495	MIMAT0003456	NM_001033449	Als2cr4	amyotrophic lateral sclerosis 2 (juvenile) chromosome region, candidate 4	0	0	1	0	0	0	0	1	0	1	0
mmu-miR-495	MIMAT0003456	NM_001033475	Tmed8	transmembrane emp24 domain containing 8	0	0	1	0	0	0	0	1	0	1	0
mmu-miR-495	MIMAT0003456	NM_001033535	Tnfaip8l3	tumor necrosis factor, alpha-induced protein 8-like 3	0	0	1	0	0	0	0	1	0	1	0
mmu-miR-495	MIMAT0003456	NM_001033538	Cass4	Cas scaffolding protein family member 4	0	0	1	0	0	0	0	1	0	1	0
mmu-miR-495	MIMAT0003456	NM_001033541	EG331493	predicted gene, EG331493	0	0	1	1	0	0	0	1	0	0	0
mmu-miR-495	MIMAT0003456	NM_001033813	9530015I07Rik	RIKEN cDNA 9530015I07 gene	0	0	1	0	0	0	0	1	0	1	0
mmu-miR-495	MIMAT0003456	NM_001034102	EG545047	predicted gene, EG545047	0	0	1	0	0	0	0	1	0	1	0
mmu-miR-495	MIMAT0003456	NM_001034858	Armc2	armadillo repeat containing 2	0	0	1	0	0	0	0	1	0	1	0
mmu-miR-495	MIMAT0003456	NM_001034863	Tmem136	transmembrane protein 136	0	0	1	0	0	0	0	1	0	1	0
mmu-miR-495	MIMAT0003456	NM_001034869	EG245263	predicted gene, EG245263	0	0	1	1	0	0	0	1	0	0	0
mmu-miR-495	MIMAT0003456	NM_001034874	Gm879	gene model 879, (NCBI)	0	0	1	0	0	0	0	1	0	1	0
mmu-miR-495	MIMAT0003456	NM_001034887	OTTMUSG00000012686	predicted gene, OTTMUSG00000012686	0	0	1	0	0	0	0	1	0	1	0
mmu-miR-495	MIMAT0003456	NM_001034894	EG436240	predicted gene, EG436240	0	0	1	0	0	0	0	1	0	1	0
mmu-miR-495	MIMAT0003456	NM_001034900	Zfp345	zinc finger protein 345	0	0	1	1	0	0	0	1	0	0	0
mmu-miR-495	MIMAT0003456	NM_001035122	Golm1	golgi membrane protein 1	0	0	1	0	0	0	0	1	0	1	0
mmu-miR-495	MIMAT0003456	NM_001035532	Akap2	A kinase (PRKA) anchor protein 2	0	0	1	0	0	0	0	1	0	1	0
mmu-miR-495	MIMAT0003456	NM_001035533	Akap2	A kinase (PRKA) anchor protein 2	0	0	1	0	0	0	0	1	0	1	0
mmu-miR-495	MIMAT0003456	NM_001036293	Nrbf2	nuclear receptor binding factor 2	0	0	1	0	0	0	0	1	0	1	0
mmu-miR-495	MIMAT0003456	NM_001037099	Cacnb4	calcium channel, voltage-dependent, beta 4 subunit	0	0	1	0	0	0	0	1	0	1	0
mmu-miR-495	MIMAT0003456	NM_001037136	Centg2	centaurin, gamma 2	0	0	1	0	0	0	0	1	0	1	0
mmu-miR-495	MIMAT0003456	NM_001037723	Adcy7	adenylate cyclase 7	0	0	1	0	0	0	0	1	0	1	0
mmu-miR-495	MIMAT0003456	NM_001037725	Als2cr13	amyotrophic lateral sclerosis 2 (juvenile) chromosome region, candidate 13 (human)	0	0	1	0	0	0	0	1	0	1	0
mmu-miR-495	MIMAT0003456	NM_001037745	Zfp791	zinc finger protein 791	0	0	1	0	0	0	0	1	0	1	0
mmu-miR-495	MIMAT0003456	NM_001037754	Baiap2	brain-specific angiogenesis inhibitor 1-associated protein 2	0	0	1	0	0	0	0	1	0	1	0
mmu-miR-495	MIMAT0003456	NM_001037757	ORF19	open reading frame 19	0	0	1	0	0	0	0	1	0	1	0
mmu-miR-495	MIMAT0003456	NM_001037759	Sgk3	serum/glucocorticoid regulated kinase 3	0	0	1	0	0	0	0	1	0	1	0
mmu-miR-495	MIMAT0003456	NM_001037846	Cnot2	CCR4-NOT transcription complex, subunit 2	0	0	1	0	0	0	0	1	0	1	0
mmu-miR-495	MIMAT0003456	NM_001037859	Csf1r	colony stimulating factor 1 receptor	0	0	1	0	0	0	0	1	0	1	0
mmu-miR-495	MIMAT0003456	NM_001037914	EG622408	predicted gene, EG622408	0	0	1	0	0	0	0	1	0	1	0
mmu-miR-495	MIMAT0003456	NM_001037925	LOC625360	similar to 2-cell-stage, variable group, member 3	0	0	1	1	0	0	0	0	0	1	0
mmu-miR-495	MIMAT0003456	NM_001038230	Anapc11	anaphase promoting complex subunit 11 homolog (yeast)	0	0	1	0	0	0	0	1	0	1	0
mmu-miR-495	MIMAT0003456	NM_001038589	Usp14	ubiquitin specific peptidase 14	0	0	1	0	0	0	0	1	0	1	0
mmu-miR-495	MIMAT0003456	NM_001038592	Glrx2	glutaredoxin 2 (thioltransferase)	0	0	1	0	0	0	0	1	0	1	0
mmu-miR-495	MIMAT0003456	NM_001038594	Glrx2	glutaredoxin 2 (thioltransferase)	0	0	1	0	0	0	0	1	0	1	0
mmu-miR-495	MIMAT0003456	NM_001038608	Txnl4a	thioredoxin-like 4A	0	0	1	0	0	0	0	1	0	1	0
mmu-miR-495	MIMAT0003456	NM_001038619	Dnm3	dynamin 3	0	0	1	0	0	0	0	1	0	1	0
mmu-miR-495	MIMAT0003456	NM_001038624	Ric3	resistance to inhibitors of cholinesterase 3 homolog (C. elegans)	0	0	1	0	0	0	0	1	0	1	0
mmu-miR-495	MIMAT0003456	NM_001038625	Sertad2	SERTA domain containing 2	0	0	1	0	0	0	0	1	0	1	0
mmu-miR-495	MIMAT0003456	NM_001038627	Smurf1	SMAD specific E3 ubiquitin protein ligase 1	0	0	1	0	0	0	0	1	0	1	0
mmu-miR-495	MIMAT0003456	NM_001038635	Stk35	serine/threonine kinase 35	0	0	1	0	0	0	0	1	0	1	0
mmu-miR-495	MIMAT0003456	NM_001038651	E130120F12Rik	RIKEN cDNA E130120F12 gene	0	0	1	0	0	0	0	1	0	1	0
mmu-miR-495	MIMAT0003456	NM_001038653	Slc16a3	solute carrier family 16 (monocarboxylic acid transporters), member 3	0	0	1	0	0	0	0	1	0	1	0
mmu-miR-495	MIMAT0003456	NM_001038654	Slc16a3	solute carrier family 16 (monocarboxylic acid transporters), member 3	0	0	1	0	0	0	0	1	0	1	0
mmu-miR-495	MIMAT0003456	NM_001038710	Tmod2	tropomodulin 2	0	0	1	0	0	0	0	1	0	1	0
mmu-miR-495	MIMAT0003456	NM_001038846	Rcsd1	RCSD domain containing 1	0	0	1	0	0	0	0	1	0	1	0
mmu-miR-495	MIMAT0003456	NM_001038990	Ids	iduronate 2-sulfatase	0	0	1	0	0	0	0	1	0	1	0
mmu-miR-495	MIMAT0003456	NM_001038991	Ids	iduronate 2-sulfatase	0	0	1	0	0	0	0	1	0	1	0
mmu-miR-495	MIMAT0003456	NM_001038999	Atp8a1	ATPase, aminophospholipid transporter (APLT), class I, type 8A, member 1	0	0	1	0	0	0	0	1	0	1	0
mmu-miR-495	MIMAT0003456	NM_001039000	Kif5a	kinesin family member 5A	0	0	1	0	0	0	0	1	0	1	0
mmu-miR-495	MIMAT0003456	NM_001039039	Kctd21	potassium channel tetramerisation domain containing 21	0	0	1	0	0	0	0	1	0	1	0
mmu-miR-495	MIMAT0003456	NM_001039050	Pkib	protein kinase inhibitor beta, cAMP dependent, testis specific	0	0	1	0	0	0	0	1	0	1	0
mmu-miR-495	MIMAT0003456	NM_001039051	Pkib	protein kinase inhibitor beta, cAMP dependent, testis specific	0	0	1	0	0	0	0	1	0	1	0
mmu-miR-495	MIMAT0003456	NM_001039052	Pkib	protein kinase inhibitor beta, cAMP dependent, testis specific	0	0	1	0	0	0	0	1	0	1	0
mmu-miR-495	MIMAT0003456	NM_001039055	Pofut1	protein O-fucosyltransferase 1	0	0	1	0	0	0	0	1	0	1	0
mmu-miR-495	MIMAT0003456	NM_001039080	Rbms2	RNA binding motif, single stranded interacting protein 2	0	0	1	0	0	0	0	1	0	1	0
mmu-miR-495	MIMAT0003456	NM_001039086	Rapgef1	Rap guanine nucleotide exchange factor (GEF) 1	0	0	1	0	0	0	0	1	0	1	0
mmu-miR-495	MIMAT0003456	NM_001039087	Rapgef1	Rap guanine nucleotide exchange factor (GEF) 1	0	0	1	0	0	0	0	1	0	1	0
mmu-miR-495	MIMAT0003456	NM_001039147	Morf4l1	mortality factor 4 like 1	0	0	1	0	0	0	0	1	0	1	0
mmu-miR-495	MIMAT0003456	NM_001039160	Gvin1	GTPase, very large interferon inducible 1	0	0	1	1	0	0	0	0	0	1	0
mmu-miR-495	MIMAT0003456	NM_001039179	Bicd2	bicaudal D homolog 2 (Drosophila)	0	0	1	0	0	0	0	1	0	1	0
mmu-miR-495	MIMAT0003456	NM_001039181	Npr3	natriuretic peptide receptor 3	0	0	1	0	0	0	0	1	0	1	0
mmu-miR-495	MIMAT0003456	NM_001039214	Mex3c	mex3 homolog C (C. elegans)	0	0	1	0	0	0	0	1	0	1	0
mmu-miR-495	MIMAT0003456	NM_001039223	OTTMUSG00000015762	predicted gene, OTTMUSG00000015762	0	0	1	0	0	0	0	1	0	1	0
mmu-miR-495	MIMAT0003456	NM_001039354	Lin7a	lin-7 homolog A (C. elegans)	0	0	1	0	0	0	0	1	0	1	0
mmu-miR-495	MIMAT0003456	NM_001039466	Trim46	tripartite motif-containing 46	0	0	1	0	0	0	0	1	0	1	0
mmu-miR-495	MIMAT0003456	NM_001039512	Ivns1abp	influenza virus NS1A binding protein	0	0	1	0	0	0	0	1	0	1	0
mmu-miR-495	MIMAT0003456	NM_001039546	Myo6	myosin VI	0	0	1	0	0	0	0	1	0	1	0
mmu-miR-495	MIMAT0003456	NM_001039648	LOC639910	hypothetical protein LOC639910	0	0	1	1	0	0	0	0	0	1	0
mmu-miR-495	MIMAT0003456	NM_001039657	Mtl5	metallothionein-like 5, testis-specific (tesmin)	0	0	1	0	0	0	0	1	0	1	0
mmu-miR-495	MIMAT0003456	NM_001039934	Mtap2	microtubule-associated protein 2	0	0	1	0	0	0	0	1	0	1	0
mmu-miR-495	MIMAT0003456	NM_001040106	Aak1	AP2 associated kinase 1	0	0	1	0	0	0	0	1	0	1	0
mmu-miR-495	MIMAT0003456	NM_001040131	Eif4g2	eukaryotic translation initiation factor 4, gamma 2	0	0	1	0	0	0	0	1	0	1	0
mmu-miR-495	MIMAT0003456	NM_001040396	2810407C02Rik	RIKEN cDNA 2810407C02 gene	0	0	1	0	0	0	0	1	0	1	0
mmu-miR-495	MIMAT0003456	NM_001040400	Tet2	tet oncogene family member 2	0	0	1	0	0	0	0	1	0	1	0
mmu-miR-495	MIMAT0003456	NM_001040611	Peg10	paternally expressed 10	0	0	1	0	0	0	0	1	0	1	0
mmu-miR-495	MIMAT0003456	NM_001040683	Med15	mediator complex subunit 15	0	0	1	0	0	0	0	1	0	1	0
mmu-miR-495	MIMAT0003456	NM_001040690	Rap1gds1	RAP1, GTP-GDP dissociation stimulator 1	0	0	1	0	0	0	0	1	0	1	0
mmu-miR-495	MIMAT0003456	NM_001042408	Txnl4a	thioredoxin-like 4A	0	0	1	0	0	0	0	1	0	1	0
mmu-miR-495	MIMAT0003456	NM_001042411	Lepre1	leprecan 1	0	0	1	0	0	0	0	1	0	1	0
mmu-miR-495	MIMAT0003456	NM_001042659	Fzd5	frizzled homolog 5 (Drosophila)	0	0	1	0	0	0	0	1	0	1	0
mmu-miR-495	MIMAT0003456	NM_001042670	ENSMUSG00000053178	predicted gene, ENSMUSG00000053178	0	0	1	0	0	0	0	1	0	1	0
mmu-miR-495	MIMAT0003456	NM_001042752	Neo1	neogenin	0	0	1	0	0	0	0	1	0	1	0
mmu-miR-495	MIMAT0003456	NM_001043322	Fmn1	formin 1	0	0	1	0	0	0	0	1	0	1	0
mmu-miR-495	MIMAT0003456	NM_001044719	D17Wsu92e	DNA segment, Chr 17, Wayne State University 92, expressed	0	0	1	0	0	0	0	1	0	1	0
mmu-miR-495	MIMAT0003456	NM_001044720	Abcc9	ATP-binding cassette, sub-family C (CFTR/MRP), member 9	0	0	1	0	0	0	0	1	0	1	0
mmu-miR-495	MIMAT0003456	NM_001045523	Bahd1	bromo adjacent homology domain containing 1	0	0	1	0	0	0	0	1	0	1	0
mmu-miR-495	MIMAT0003456	NM_001045527	Hsf5	heat shock transcription factor family member 5	0	0	1	0	0	0	0	1	0	1	0
mmu-miR-495	MIMAT0003456	NM_001045539	Xlr5a	X-linked lymphocyte-regulated 5A	0	0	1	0	0	0	0	1	0	1	0
mmu-miR-495	MIMAT0003456	NM_001045540	OTTMUSG00000005523	predicted gene, OTTMUSG00000005523	0	0	1	0	0	0	0	1	0	1	0
mmu-miR-495	MIMAT0003456	NM_001048192	Agbl5	ATP/GTP binding protein-like 5	0	0	1	0	0	0	0	1	0	1	0
mmu-miR-495	MIMAT0003456	NM_001077354	C77370	expressed sequence C77370	0	0	1	0	0	0	0	1	0	1	0
mmu-miR-495	MIMAT0003456	NM_001077496	Evi2b	ecotropic viral integration site 2b	0	0	1	0	0	0	0	1	0	1	0
mmu-miR-495	MIMAT0003456	NM_001077596	Shroom3	shroom family member 3	0	0	1	0	0	0	0	1	0	1	0
mmu-miR-495	MIMAT0003456	NM_001077695	Ncoa2	nuclear receptor coactivator 2	0	0	1	0	0	0	0	1	0	1	0
mmu-miR-495	MIMAT0003456	NM_001078167	Sfrs1	splicing factor, arginine/serine-rich 1 (ASF/SF2)	0	0	1	0	0	0	0	1	0	1	0
mmu-miR-495	MIMAT0003456	NM_001079830	Trim33	tripartite motif-containing 33	0	0	1	0	0	0	0	1	0	1	0
mmu-miR-495	MIMAT0003456	NM_001079847	Gpr64	G protein-coupled receptor 64	0	0	1	0	0	0	0	1	0	1	0
mmu-miR-495	MIMAT0003456	NM_001079848	Gpr64	G protein-coupled receptor 64	0	0	1	0	0	0	0	1	0	1	0
mmu-miR-495	MIMAT0003456	NM_001079857	Gpr64	G protein-coupled receptor 64	0	0	1	0	0	0	0	1	0	1	0
mmu-miR-495	MIMAT0003456	NM_001079869	Hoxb3	homeo box B3	0	0	1	0	0	0	0	1	0	1	0
mmu-miR-495	MIMAT0003456	NM_001080134	Tmpo	thymopoietin	0	0	1	0	0	0	0	1	0	1	0
mmu-miR-495	MIMAT0003456	NM_001080387	Fusip1	FUS interacting protein (serine-arginine rich) 1	0	0	1	1	0	0	0	1	0	0	0
mmu-miR-495	MIMAT0003456	NM_001080548	Usp6nl	USP6 N-terminal like	0	0	1	0	0	0	0	1	0	1	0
mmu-miR-495	MIMAT0003456	NM_001080557	Vamp1	vesicle-associated membrane protein 1	0	0	1	0	0	0	0	1	0	1	0
mmu-miR-495	MIMAT0003456	NM_001080712	EG665186	predicted gene, EG665186	0	0	1	0	0	0	0	1	0	1	0
mmu-miR-495	MIMAT0003456	NM_001080769	Uhrf1bp1	UHRF1 (ICBP90) binding protein 1	0	0	1	0	0	0	0	1	0	1	0
mmu-miR-495	MIMAT0003456	NM_001080780	Ret	ret proto-oncogene	0	0	1	0	0	0	0	1	0	1	0
mmu-miR-495	MIMAT0003456	NM_001080795	G3bp2	GTPase activating protein (SH3 domain) binding protein 2	0	0	1	0	0	0	0	1	0	1	0
mmu-miR-495	MIMAT0003456	NM_001080796	G3bp2	GTPase activating protein (SH3 domain) binding protein 2	0	0	1	0	0	0	0	1	0	1	0
mmu-miR-495	MIMAT0003456	NM_001080797	G3bp2	GTPase activating protein (SH3 domain) binding protein 2	0	0	1	0	0	0	0	1	0	1	0
mmu-miR-495	MIMAT0003456	NM_001080798	Aff1	AF4/FMR2 family, member 1	0	0	1	0	0	0	0	1	0	1	0
mmu-miR-495	MIMAT0003456	NM_001080924	Znrf3	zinc and ring finger 3	0	0	1	0	0	0	0	1	0	1	0
mmu-miR-495	MIMAT0003456	NM_001080931	Med13	mediator complex subunit 13	0	0	1	0	0	0	0	1	0	1	0
mmu-miR-495	MIMAT0003456	NM_001080934	Slc16a5	solute carrier family 16 (monocarboxylic acid transporters), member 5	0	0	1	0	0	0	0	1	0	1	0
mmu-miR-495	MIMAT0003456	NM_001080965	Aurkc	aurora kinase C	0	0	1	0	0	0	0	1	0	1	0
mmu-miR-495	MIMAT0003456	NM_001080966	Aurkc	aurora kinase C	0	0	1	0	0	0	0	1	0	1	0
mmu-miR-495	MIMAT0003456	NM_001080974	Sri	sorcin	0	0	1	0	0	0	0	1	0	1	0
mmu-miR-495	MIMAT0003456	NM_001081016	Zc3h7b	zinc finger CCCH type containing 7B	0	0	1	0	0	0	0	1	0	1	0
mmu-miR-495	MIMAT0003456	NM_001081038	Btbd16	BTB (POZ) domain containing 16	0	0	1	0	0	0	0	1	0	1	0
mmu-miR-495	MIMAT0003456	NM_001081045	1700081L11Rik	RIKEN cDNA 1700081L11 gene	0	0	1	0	0	0	0	1	0	1	0
mmu-miR-495	MIMAT0003456	NM_001081056	Xpot	exportin, tRNA (nuclear export receptor for tRNAs)	0	0	1	0	0	0	0	1	0	1	0
mmu-miR-495	MIMAT0003456	NM_001081061	Bdp1	B double prime 1, subunit of RNA polymerase III transcription initiation factor IIIB	0	0	1	0	0	0	0	1	0	1	0
mmu-miR-495	MIMAT0003456	NM_001081064	Pdzd2	PDZ domain containing 2	0	0	1	0	0	0	0	1	0	1	0
mmu-miR-495	MIMAT0003456	NM_001081105	Rhoh	ras homolog gene family, member H	0	0	1	0	0	0	0	1	0	1	0
mmu-miR-495	MIMAT0003456	NM_001081116	Arhgef17	Rho guanine nucleotide exchange factor (GEF) 17	0	0	1	0	0	0	0	1	0	1	0
mmu-miR-495	MIMAT0003456	NM_001081119	Abhd13	abhydrolase domain containing 13	0	0	1	0	0	0	0	1	0	1	0
mmu-miR-495	MIMAT0003456	NM_001081132	Upf2	UPF2 regulator of nonsense transcripts homolog (yeast)	0	0	1	0	0	0	0	1	0	1	0
mmu-miR-495	MIMAT0003456	NM_001081135	Prrg3	proline rich Gla (G-carboxyglutamic acid) 3 (transmembrane)	0	0	1	0	0	0	0	1	0	1	0
mmu-miR-495	MIMAT0003456	NM_001081149	Myst3	MYST histone acetyltransferase (monocytic leukemia) 3	0	0	1	0	0	0	0	1	0	1	0
mmu-miR-495	MIMAT0003456	NM_001081163	Chsy1	carbohydrate (chondroitin) synthase 1	0	0	1	0	0	0	0	1	0	1	0
mmu-miR-495	MIMAT0003456	NM_001081178	Gpr116	G protein-coupled receptor 116	0	0	1	0	0	0	0	1	0	1	0
mmu-miR-495	MIMAT0003456	NM_001081182	Atp8b2	Atpase, class I, type 8B, member 2	0	0	1	0	0	0	0	1	0	1	0
mmu-miR-495	MIMAT0003456	NM_001081183	1110037F02Rik	RIKEN cDNA 1110037F02 gene	0	0	1	0	0	0	0	1	0	1	0
mmu-miR-495	MIMAT0003456	NM_001081191	Eml5	echinoderm microtubule associated protein like 5	0	0	1	0	0	0	0	1	0	1	0
mmu-miR-495	MIMAT0003456	NM_001081193	Lemd3	LEM domain containing 3	0	0	1	0	0	0	0	1	0	1	0
mmu-miR-495	MIMAT0003456	NM_001081204	B3galtl	beta 1,3-galactosyltransferase-like	0	0	1	0	0	0	0	1	0	1	0
mmu-miR-495	MIMAT0003456	NM_001081205	Npal1	NIPA-like domain containing 1	0	0	1	0	0	0	0	1	0	1	0
mmu-miR-495	MIMAT0003456	NM_001081217	Zfp174	zinc finger protein 174	0	0	1	0	0	0	0	1	0	1	0
mmu-miR-495	MIMAT0003456	NM_001081229	Tsc22d2	TSC22 domain family 2	0	0	1	0	0	0	0	1	0	1	0
mmu-miR-495	MIMAT0003456	NM_001081230	Mtap9	microtubule-associated protein 9	0	0	1	0	0	0	0	1	0	1	0
mmu-miR-495	MIMAT0003456	NM_001081255	Lrch3	leucine-rich repeats and calponin homology (CH) domain containing 3	0	0	1	0	0	0	0	1	0	1	0
mmu-miR-495	MIMAT0003456	NM_001081256	Jmjd1b	jumonji domain containing 1B	0	0	1	0	0	0	0	1	0	1	0
mmu-miR-495	MIMAT0003456	NM_001081263	Slc44a5	solute carrier family 44, member 5	0	0	1	0	0	0	0	1	0	1	0
mmu-miR-495	MIMAT0003456	NM_001081276	Clasp1	CLIP associating protein 1	0	0	1	0	0	0	0	1	0	1	0
mmu-miR-495	MIMAT0003456	NM_001081282	Ibtk	inhibitor of Bruton agammaglobulinemia tyrosine kinase	0	0	1	0	0	0	0	1	0	1	0
mmu-miR-495	MIMAT0003456	NM_001081287	Mpp7	membrane protein, palmitoylated 7 (MAGUK p55 subfamily member 7)	0	0	1	0	0	0	0	1	0	1	0
mmu-miR-495	MIMAT0003456	NM_001081317	Anubl1	AN1, ubiquitin-like, homolog (Xenopus laevis)	0	0	1	0	0	0	0	1	0	1	0
mmu-miR-495	MIMAT0003456	NM_001081319	C030046E11Rik	RIKEN cDNA C030046E11 gene	0	0	1	0	0	0	0	1	0	1	0
mmu-miR-495	MIMAT0003456	NM_001081323	Mphosph9	M-phase phosphoprotein 9	0	0	1	0	0	0	0	1	0	1	0
mmu-miR-495	MIMAT0003456	NM_001081341	Scaper	S phase cyclin A-associated protein in the ER	0	0	1	0	0	0	0	1	0	1	0
mmu-miR-495	MIMAT0003456	NM_001081363	Cenpf	centromere protein F	0	0	1	0	0	0	0	1	0	1	0
mmu-miR-495	MIMAT0003456	NM_001081376	Chd5	chromodomain helicase DNA binding protein 5	0	0	1	0	0	0	0	1	0	1	0
mmu-miR-495	MIMAT0003456	NM_001081395	Amotl1	angiomotin-like 1	0	0	1	0	0	0	0	1	0	1	0
mmu-miR-495	MIMAT0003456	NM_001081403	Klhl14	kelch-like 14 (Drosophila)	0	0	1	0	0	0	0	1	0	1	0
mmu-miR-495	MIMAT0003456	NM_001081409	Phf20l1	PHD finger protein 20-like 1	0	0	1	0	0	0	0	1	0	1	0
mmu-miR-495	MIMAT0003456	NM_001081425	Rbm24	RNA binding motif protein 24	0	0	1	0	0	0	0	1	0	1	0
mmu-miR-495	MIMAT0003456	NM_001081429	Ccdc15	coiled-coil domain containing 15	0	0	1	0	0	0	0	1	0	1	0
mmu-miR-495	MIMAT0003456	NM_001081433	Ankrd44	ankyrin repeat domain 44	0	0	1	0	0	0	0	1	0	1	0
mmu-miR-495	MIMAT0003456	NM_001081453	Nin	ninein	0	0	1	0	0	0	0	1	0	1	0
mmu-miR-495	MIMAT0003456	NM_001081641	Pitpnm3	PITPNM family member 3	0	0	1	0	0	0	0	1	0	1	0
mmu-miR-495	MIMAT0003456	NM_001081650	Rgs3	regulator of G-protein signaling 3	0	0	1	0	0	0	0	1	0	1	0
mmu-miR-495	MIMAT0003456	NM_001081750	Zfp664	zinc finger protein 664	0	0	1	0	0	0	0	1	0	1	0
mmu-miR-495	MIMAT0003456	NM_001081956	Sfrs17b	splicing factor, arginine/serine-rich 17b	0	0	1	0	0	0	0	1	0	1	0
mmu-miR-495	MIMAT0003456	NM_001081963	9430020K01Rik	RIKEN cDNA 9430020K01 gene	0	0	1	0	0	0	0	1	0	1	0
mmu-miR-495	MIMAT0003456	NM_001081977	Rnf144a	ring finger protein 144A	0	0	1	0	0	0	0	1	0	1	0
mmu-miR-495	MIMAT0003456	NM_001081979	Mecp2	methyl CpG binding protein 2	0	0	1	0	0	0	0	1	0	1	0
mmu-miR-495	MIMAT0003456	NM_001082412	Mcart6	mitochondrial carrier triple repeat 6	0	0	1	0	0	0	0	1	0	1	0
mmu-miR-495	MIMAT0003456	NM_001082414	Sh3d19	SH3 domain protein D19	0	0	1	0	0	0	0	1	0	1	0
mmu-miR-495	MIMAT0003456	NM_001082553	Rab27b	RAB27b, member RAS oncogene family	0	0	1	0	0	0	0	1	0	1	0
mmu-miR-495	MIMAT0003456	NM_001083114	Pphln1	periphilin 1	0	0	1	0	0	0	0	1	0	1	0
mmu-miR-495	MIMAT0003456	NM_001083119	Ptpru	protein tyrosine phosphatase, receptor type, U	0	0	1	0	0	0	0	1	0	1	0
mmu-miR-495	MIMAT0003456	NM_001083125	Lhx6	LIM homeobox protein 6	0	0	1	0	0	0	0	1	0	1	0
mmu-miR-495	MIMAT0003456	NM_001083127	Lhx6	LIM homeobox protein 6	0	0	1	0	0	0	0	1	0	1	0
mmu-miR-495	MIMAT0003456	NM_001083316	Pdgfra	platelet derived growth factor receptor, alpha polypeptide	0	0	1	0	0	0	0	1	0	1	0
mmu-miR-495	MIMAT0003456	NM_001083318	Etv3	ets variant gene 3	0	0	1	0	0	0	0	1	0	1	0
mmu-miR-495	MIMAT0003456	NM_001083320	Magi1	membrane associated guanylate kinase, WW and PDZ domain containing 1	0	0	1	0	0	0	0	1	0	1	0
mmu-miR-495	MIMAT0003456	NM_001083321	Magi1	membrane associated guanylate kinase, WW and PDZ domain containing 1	0	0	1	0	0	0	0	1	0	1	0
mmu-miR-495	MIMAT0003456	NM_001083322	Klrk1	killer cell lectin-like receptor subfamily K, member 1	0	0	1	0	0	0	0	1	0	1	0
mmu-miR-495	MIMAT0003456	NM_001083342	Ptchd2	patched domain containing 2	0	0	1	0	0	0	0	1	0	1	0
mmu-miR-495	MIMAT0003456	NM_001083616	Cacna1d	calcium channel, voltage-dependent, L type, alpha 1D subunit	0	0	1	0	0	0	0	1	0	1	0
mmu-miR-495	MIMAT0003456	NM_001083628	AK220484	cDNA sequence AK220484	0	0	1	0	0	0	0	1	0	1	0
mmu-miR-495	MIMAT0003456	NM_001083806	Gria2	glutamate receptor, ionotropic, AMPA2 (alpha 2)	0	0	1	0	0	0	0	1	0	1	0
mmu-miR-495	MIMAT0003456	NM_001083917	Scn3b	sodium channel, voltage-gated, type III, beta	0	0	1	0	0	0	0	1	0	1	0
mmu-miR-495	MIMAT0003456	NM_001083937	Slc35a2	solute carrier family 35 (UDP-galactose transporter), member A2	0	0	1	0	0	0	0	1	0	1	0
mmu-miR-495	MIMAT0003456	NM_001083967	Tcf4	transcription factor 4	0	0	1	0	0	0	0	1	0	1	0
mmu-miR-495	MIMAT0003456	NM_001085355	Arid1b	AT rich interactive domain 1B (Swi1 like)	0	0	1	0	0	0	0	1	0	1	0
mmu-miR-495	MIMAT0003456	NM_001085373	Mcc	mutated in colorectal cancers	0	0	1	0	0	0	0	1	0	1	0
mmu-miR-495	MIMAT0003456	NM_001085374	Mcc	mutated in colorectal cancers	0	0	1	0	0	0	0	1	0	1	0
mmu-miR-495	MIMAT0003456	NM_001085376	Pappa2	pappalysin 2	0	0	1	0	0	0	0	1	0	1	0
mmu-miR-495	MIMAT0003456	NM_001085383	Anxa9	annexin A9	0	0	1	0	0	0	0	1	0	1	0
mmu-miR-495	MIMAT0003456	NM_001085385	1600014C10Rik	RIKEN cDNA 1600014C10 gene	0	0	1	0	0	0	0	1	0	1	0
mmu-miR-495	MIMAT0003456	NM_001085421	Tspyl5	testis-specific protein, Y-encoded-like 5	0	0	1	0	0	0	0	1	0	1	0
mmu-miR-495	MIMAT0003456	NM_001085448	Ctnnd1	catenin (cadherin associated protein), delta 1	0	0	1	0	0	0	0	1	0	1	0
mmu-miR-495	MIMAT0003456	NM_001085449	Ctnnd1	catenin (cadherin associated protein), delta 1	0	0	1	0	0	0	0	1	0	1	0
mmu-miR-495	MIMAT0003456	NM_001085495	Arfgef2	ADP-ribosylation factor guanine nucleotide-exchange factor 2 (brefeldin A-inhibited)	0	0	1	0	0	0	0	1	0	1	0
mmu-miR-495	MIMAT0003456	NM_001085501	Ppp1r3d	protein phosphatase 1, regulatory subunit 3D	0	0	1	0	0	0	0	1	0	1	0
mmu-miR-495	MIMAT0003456	NM_001085507	Zbtb34	zinc finger and BTB domain containing 34	0	0	1	0	0	0	0	1	0	1	0
mmu-miR-495	MIMAT0003456	NM_001085508	4930500O05Rik	RIKEN cDNA 4930500O05 gene	0	0	1	0	0	0	0	1	0	1	0
mmu-miR-495	MIMAT0003456	NM_001085511	4932429P05Rik	RIKEN cDNA 4932429P05 gene	0	0	1	0	0	0	0	1	0	1	0
mmu-miR-495	MIMAT0003456	NM_001085549	OTTMUSG00000008561	predicted gene, OTTMUSG00000008561	0	0	1	0	0	0	0	1	0	1	0
mmu-miR-495	MIMAT0003456	NM_001093750	Ptchd1	patched domain containing 1	0	0	1	0	0	0	0	1	0	1	0
mmu-miR-495	MIMAT0003456	NM_001093752	Sfrs11	splicing factor, arginine/serine-rich 11	0	0	1	0	0	0	0	1	0	1	0
mmu-miR-495	MIMAT0003456	NM_001093753	Sfrs11	splicing factor, arginine/serine-rich 11	0	0	1	0	0	0	0	1	0	1	0
mmu-miR-495	MIMAT0003456	NM_001093775	Myt1l	myelin transcription factor 1-like	0	0	1	0	0	0	0	1	0	1	0
mmu-miR-495	MIMAT0003456	NM_001093776	Myt1l	myelin transcription factor 1-like	0	0	1	0	0	0	0	1	0	1	0
mmu-miR-495	MIMAT0003456	NM_001093778	Myt1l	myelin transcription factor 1-like	0	0	1	0	0	0	0	1	0	1	0
mmu-miR-495	MIMAT0003456	NM_001097621	Kif26a	kinesin family member 26A	0	0	1	0	0	0	0	1	0	1	0
mmu-miR-495	MIMAT0003456	NM_001098168	Ddef2	development and differentiation enhancing factor 2	0	0	1	0	0	0	0	1	0	1	0
mmu-miR-495	MIMAT0003456	NM_001098170	Pcdh10	protocadherin 10	0	0	1	0	0	0	0	1	0	1	0
mmu-miR-495	MIMAT0003456	NM_001098171	Pcdh10	protocadherin 10	0	0	1	0	0	0	0	1	0	1	0
mmu-miR-495	MIMAT0003456	NM_001098225	Adam22	a disintegrin and metallopeptidase domain 22	0	0	1	0	0	0	0	1	0	1	0
mmu-miR-495	MIMAT0003456	NM_001098476	Grsf1	G-rich RNA sequence binding factor 1	0	0	1	0	0	0	0	1	0	1	0
mmu-miR-495	MIMAT0003456	NM_001098723	Yy2	Yy2 transcription factor	0	0	1	0	0	0	0	1	0	1	0
mmu-miR-495	MIMAT0003456	NM_001099288	AU040829	expressed sequence AU040829	0	0	1	0	0	0	0	1	0	1	0
mmu-miR-495	MIMAT0003456	NM_001099326	OTTMUSG00000016694	predicted gene, OTTMUSG00000016694	0	0	1	0	0	0	0	1	0	1	0
mmu-miR-495	MIMAT0003456	NM_007379	Abca2	ATP-binding cassette, sub-family A (ABC1), member 2	0	0	1	0	0	0	0	1	0	1	0
mmu-miR-495	MIMAT0003456	NM_007394	Acvr1	activin A receptor, type 1	0	0	1	0	0	0	0	1	0	1	0
mmu-miR-495	MIMAT0003456	NM_007395	Acvr1b	activin A receptor, type 1B	0	0	1	0	0	0	0	1	0	1	0
mmu-miR-495	MIMAT0003456	NM_007396	Acvr2a	activin receptor IIA	0	0	1	0	0	0	0	1	0	1	0
mmu-miR-495	MIMAT0003456	NM_007405	Adcy6	adenylate cyclase 6	0	0	1	0	0	0	0	1	0	1	0
mmu-miR-495	MIMAT0003456	NM_007407	Adcyap1r1	adenylate cyclase activating polypeptide 1 receptor 1	0	0	1	0	0	0	0	1	0	1	0
mmu-miR-495	MIMAT0003456	NM_007414	Adprh	ADP-ribosylarginine hydrolase	0	0	1	0	0	0	0	1	0	1	0
mmu-miR-495	MIMAT0003456	NM_007416	Adra1b	adrenergic receptor, alpha 1b	0	0	1	0	0	0	0	1	0	1	0
mmu-miR-495	MIMAT0003456	NM_007424	Acan	aggrecan	0	0	1	0	0	0	0	1	0	1	0
mmu-miR-495	MIMAT0003456	NM_007428	Agt	angiotensinogen (serpin peptidase inhibitor, clade A, member 8)	0	0	1	0	0	0	0	1	0	1	0
mmu-miR-495	MIMAT0003456	NM_007459	Ap2a2	adaptor protein complex AP-2, alpha 2 subunit	0	0	1	0	0	0	0	1	0	1	0
mmu-miR-495	MIMAT0003456	NM_007472	Aqp1	aquaporin 1	0	0	1	0	0	0	0	1	0	1	0
mmu-miR-495	MIMAT0003456	NM_007488	Arnt2	aryl hydrocarbon receptor nuclear translocator 2	0	0	1	0	0	0	0	1	0	1	0
mmu-miR-495	MIMAT0003456	NM_007501	Neurod4	neurogenic differentiation 4	0	0	1	0	0	0	0	1	0	1	0
mmu-miR-495	MIMAT0003456	NM_007502	Atp1b3	ATPase, Na+/K+ transporting, beta 3 polypeptide	0	0	1	0	0	0	0	1	0	1	0
mmu-miR-495	MIMAT0003456	NM_007506	Atp5g1	ATP synthase, H+ transporting, mitochondrial F0 complex, subunit c (subunit 9), isoform 1	0	0	1	0	0	0	0	1	0	1	0
mmu-miR-495	MIMAT0003456	NM_007513	Slc7a1	solute carrier family 7 (cationic amino acid transporter, y+ system), member 1	0	0	1	0	0	0	0	1	0	1	0
mmu-miR-495	MIMAT0003456	NM_007523	Bak1	BCL2-antagonist/killer 1	0	0	1	0	0	0	0	1	0	1	0
mmu-miR-495	MIMAT0003456	NM_007545	Hrk	harakiri, BCL2 interacting protein (contains only BH3 domain)	0	0	1	0	0	0	0	1	0	1	0
mmu-miR-495	MIMAT0003456	NM_007560	Bmpr1b	bone morphogenetic protein receptor, type 1B	0	0	1	0	0	0	0	1	0	1	0
mmu-miR-495	MIMAT0003456	NM_007570	Btg2	B-cell translocation gene 2, anti-proliferative	0	0	1	0	0	0	0	1	0	1	0
mmu-miR-495	MIMAT0003456	NM_007631	Ccnd1	cyclin D1	0	0	1	0	0	0	0	1	0	1	0
mmu-miR-495	MIMAT0003456	NM_007635	Ccng2	cyclin G2	0	0	1	0	0	0	0	1	0	1	0
mmu-miR-495	MIMAT0003456	NM_007661	Cdc2l1	cell division cycle 2-like 1	0	0	1	0	0	0	0	1	0	1	0
mmu-miR-495	MIMAT0003456	NM_007664	Cdh2	cadherin 2	0	0	1	0	0	0	0	1	0	1	0
mmu-miR-495	MIMAT0003456	NM_007688	Cfl2	cofilin 2, muscle	0	0	1	0	0	0	0	1	0	1	0
mmu-miR-495	MIMAT0003456	NM_007722	Cxcr7	chemokine (C-X-C motif) receptor 7	0	0	1	0	0	0	0	1	0	1	0
mmu-miR-495	MIMAT0003456	NM_007726	Cnr1	cannabinoid receptor 1 (brain)	0	0	1	0	0	0	0	1	0	1	0
mmu-miR-495	MIMAT0003456	NM_007730	Col12a1	collagen, type XII, alpha 1	0	0	1	0	0	0	0	1	0	1	0
mmu-miR-495	MIMAT0003456	NM_007754	Cpd	carboxypeptidase D	0	0	1	0	0	0	0	1	0	1	0
mmu-miR-495	MIMAT0003456	NM_007766	Pcdha4	protocadherin alpha 4	0	0	1	0	0	0	0	1	0	1	0
mmu-miR-495	MIMAT0003456	NM_007767	Pcdha6	protocadherin alpha 6	0	0	1	0	0	0	0	1	0	1	0
mmu-miR-495	MIMAT0003456	NM_007781	Csf2rb2	colony stimulating factor 2 receptor, beta 2, low-affinity (granulocyte-macrophage)	0	0	1	0	0	0	0	1	0	1	0
mmu-miR-495	MIMAT0003456	NM_007814	Cyp2b19	cytochrome P450, family 2, subfamily b, polypeptide 19	0	0	1	0	0	0	0	1	0	1	0
mmu-miR-495	MIMAT0003456	NM_007831	Dcc	deleted in colorectal carcinoma	0	0	1	0	0	0	0	1	0	1	0
mmu-miR-495	MIMAT0003456	NM_007842	Dhx9	DEAH (Asp-Glu-Ala-His) box polypeptide 9	0	0	1	0	0	0	0	1	0	1	0
mmu-miR-495	MIMAT0003456	NM_007860	Dio1	deiodinase, iodothyronine, type I	0	0	1	0	0	0	0	1	0	1	0
mmu-miR-495	MIMAT0003456	NM_007882	Dsc3	desmocollin 3	0	0	1	0	0	0	0	1	0	1	0
mmu-miR-495	MIMAT0003456	NM_007892	E2f5	E2F transcription factor 5	0	0	1	0	0	0	0	1	0	1	0
mmu-miR-495	MIMAT0003456	NM_007896	Mapre1	microtubule-associated protein, RP/EB family, member 1	0	0	1	0	0	0	0	1	0	1	0
mmu-miR-495	MIMAT0003456	NM_007904	Ednrb	endothelin receptor type B	0	0	1	0	0	0	0	1	0	1	0
mmu-miR-495	MIMAT0003456	NM_007908	Eef2k	eukaryotic elongation factor-2 kinase	0	0	1	0	0	0	0	1	0	1	0
mmu-miR-495	MIMAT0003456	NM_007913	Egr1	early growth response 1	0	0	1	0	0	0	0	1	0	1	0
mmu-miR-495	MIMAT0003456	NM_007914	Ehf	ets homologous factor	0	0	1	0	0	0	0	1	0	1	0
mmu-miR-495	MIMAT0003456	NM_007916	Ddx19a	DEAD (Asp-Glu-Ala-Asp) box polypeptide 19a	0	0	1	0	0	0	0	1	0	1	0
mmu-miR-495	MIMAT0003456	NM_007925	Eln	elastin	0	0	1	0	0	0	0	1	0	1	0
mmu-miR-495	MIMAT0003456	NM_007929	Emp2	epithelial membrane protein 2	0	0	1	0	0	0	0	1	0	1	0
mmu-miR-495	MIMAT0003456	NM_007968	Ewsr1	Ewing sarcoma breakpoint region 1	0	0	1	0	0	0	0	1	0	1	0
mmu-miR-495	MIMAT0003456	NM_008037	Fosl2	fos-like antigen 2	0	0	1	0	0	0	0	1	0	1	0
mmu-miR-495	MIMAT0003456	NM_008060	Ganab	alpha glucosidase 2 alpha neutral subunit	0	0	1	0	0	0	0	1	0	1	0
mmu-miR-495	MIMAT0003456	NM_008061	G6pc	glucose-6-phosphatase, catalytic	0	0	1	0	0	0	0	1	0	1	0
mmu-miR-495	MIMAT0003456	NM_008069	Gabrb1	gamma-aminobutyric acid (GABA-A) receptor, subunit beta 1	0	0	1	0	0	0	0	1	0	1	0
mmu-miR-495	MIMAT0003456	NM_008074	Gabrg3	gamma-aminobutyric acid (GABA-A) receptor, subunit gamma 3	0	0	1	0	0	0	0	1	0	1	0
mmu-miR-495	MIMAT0003456	NM_008078	Gad2	glutamic acid decarboxylase 2	0	0	1	0	0	0	0	1	0	1	0
mmu-miR-495	MIMAT0003456	NM_008079	Galc	galactosylceramidase	0	0	1	1	0	0	0	1	0	0	0
mmu-miR-495	MIMAT0003456	NM_008081	B4galnt2	beta-1,4-N-acetyl-galactosaminyl transferase 2	0	0	1	0	0	0	0	1	0	1	0
mmu-miR-495	MIMAT0003456	NM_008090	Gata2	GATA binding protein 2	0	0	1	0	0	0	0	1	0	1	0
mmu-miR-495	MIMAT0003456	NM_008099	Gcet2	germinal center expressed transcript 2	0	0	1	0	0	0	0	1	0	1	0
mmu-miR-495	MIMAT0003456	NM_008108	Gdf3	growth differentiation factor 3	0	0	1	0	0	0	0	1	0	1	0
mmu-miR-495	MIMAT0003456	NM_008112	Gdi2	guanosine diphosphate (GDP) dissociation inhibitor 2	0	0	1	0	0	0	0	1	0	1	0
mmu-miR-495	MIMAT0003456	NM_008130	Gli3	GLI-Kruppel family member GLI3	0	0	1	0	0	0	0	1	0	1	0
mmu-miR-495	MIMAT0003456	NM_008150	Gpc4	glypican 4	0	0	1	0	0	0	0	1	0	1	0
mmu-miR-495	MIMAT0003456	NM_008173	Nr3c1	nuclear receptor subfamily 3, group C, member 1	0	0	1	0	0	0	0	1	0	1	0
mmu-miR-495	MIMAT0003456	NM_008194	Gyk	glycerol kinase	0	0	1	0	0	0	0	1	0	1	0
mmu-miR-495	MIMAT0003456	NM_008209	Mr1	major histocompatibility complex, class I-related	0	0	1	0	0	0	0	1	0	1	0
mmu-miR-495	MIMAT0003456	NM_008216	Has2	hyaluronan synthase 2	0	0	1	0	0	0	0	1	0	1	0
mmu-miR-495	MIMAT0003456	NM_008222	Hccs	holocytochrome c synthetase	0	0	1	0	0	0	0	1	0	1	0
mmu-miR-495	MIMAT0003456	NM_008241	Foxg1	forkhead box G1	0	0	1	0	0	0	0	1	0	1	0
mmu-miR-495	MIMAT0003456	NM_008245	Hhex	hematopoietically expressed homeobox	0	0	1	0	0	0	0	1	0	1	0
mmu-miR-495	MIMAT0003456	NM_008253	Hmgb3	high mobility group box 3	0	0	1	0	0	0	0	1	0	1	0
mmu-miR-495	MIMAT0003456	NM_008258	Hn1	hematological and neurological expressed sequence 1	0	0	1	0	0	0	0	1	0	1	0
mmu-miR-495	MIMAT0003456	NM_008259	Foxa1	forkhead box A1	0	0	1	0	0	0	0	1	0	1	0
mmu-miR-495	MIMAT0003456	NM_008261	Hnf4a	hepatic nuclear factor 4, alpha	0	0	1	0	0	0	0	1	0	1	0
mmu-miR-495	MIMAT0003456	NM_008270	Hoxb9	homeo box B9	0	0	1	0	0	0	0	1	0	1	0
mmu-miR-495	MIMAT0003456	NM_008274	Hoxd12	homeo box D12	0	0	1	0	0	0	0	1	0	1	0
mmu-miR-495	MIMAT0003456	NM_008302	Hsp90ab1	heat shock protein 90kDa alpha (cytosolic), class B member 1	0	0	1	0	0	0	0	1	0	1	0
mmu-miR-495	MIMAT0003456	NM_008314	Htr5a	5-hydroxytryptamine (serotonin) receptor 5A	0	0	1	0	0	0	0	1	0	1	0
mmu-miR-495	MIMAT0003456	NM_008320	Irf8	interferon regulatory factor 8	0	0	1	0	0	0	0	1	0	1	0
mmu-miR-495	MIMAT0003456	NM_008338	Ifngr2	interferon gamma receptor 2	0	0	1	0	0	0	0	1	0	1	0
mmu-miR-495	MIMAT0003456	NM_008362	Il1r1	interleukin 1 receptor, type I	0	0	1	0	0	0	0	1	0	1	0
mmu-miR-495	MIMAT0003456	NM_008364	Il1rap	interleukin 1 receptor accessory protein	0	0	1	0	0	0	0	1	0	1	0
mmu-miR-495	MIMAT0003456	NM_008365	Il18r1	interleukin 18 receptor 1	0	0	1	0	0	0	0	1	0	1	0
mmu-miR-495	MIMAT0003456	NM_008371	Il7	interleukin 7	0	0	1	0	0	0	0	1	0	1	0
mmu-miR-495	MIMAT0003456	NM_008374	Il9r	interleukin 9 receptor	0	0	1	0	0	0	0	1	0	1	0
mmu-miR-495	MIMAT0003456	NM_008381	Inhbb	inhibin beta-B	0	0	1	0	0	0	0	1	0	1	0
mmu-miR-495	MIMAT0003456	NM_008402	Itgav	integrin alpha V	0	0	1	0	0	0	0	1	0	1	0
mmu-miR-495	MIMAT0003456	NM_008441	Kif1b	kinesin family member 1B	0	0	1	0	0	0	0	1	0	1	0
mmu-miR-495	MIMAT0003456	NM_008445	Kif3c	kinesin family member 3C	0	0	1	0	0	0	0	1	0	1	0
mmu-miR-495	MIMAT0003456	NM_008448	Kif5b	kinesin family member 5B	0	0	1	0	0	0	0	1	0	1	0
mmu-miR-495	MIMAT0003456	NM_008462	Klra2	killer cell lectin-like receptor, subfamily A, member 2	0	0	1	0	0	0	0	1	0	1	0
mmu-miR-495	MIMAT0003456	NM_008465	Kpna1	karyopherin (importin) alpha 1	0	0	1	0	0	0	0	1	0	1	0
mmu-miR-495	MIMAT0003456	NM_008485	Lamc2	laminin, gamma 2	0	0	1	0	0	0	0	1	0	1	0
mmu-miR-495	MIMAT0003456	NM_008500	Lhx6	LIM homeobox protein 6	0	0	1	0	0	0	0	1	0	1	0
mmu-miR-495	MIMAT0003456	NM_008530	Ly6f	lymphocyte antigen 6 complex, locus F	0	0	1	0	0	0	0	1	0	1	0
mmu-miR-495	MIMAT0003456	NM_008532	Tacstd1	tumor-associated calcium signal transducer 1	0	0	1	1	0	0	0	1	0	0	0
mmu-miR-495	MIMAT0003456	NM_008537	Amacr	alpha-methylacyl-CoA racemase	0	0	1	0	0	0	0	1	0	1	0
mmu-miR-495	MIMAT0003456	NM_008569	Anapc1	anaphase promoting complex subunit 1	0	0	1	0	0	0	0	1	0	1	0
mmu-miR-495	MIMAT0003456	NM_008605	Mmp12	matrix metallopeptidase 12	0	0	1	0	0	0	0	1	0	1	0
mmu-miR-495	MIMAT0003456	NM_008623	Mpz	myelin protein zero	0	0	1	0	0	0	0	1	0	1	0
mmu-miR-495	MIMAT0003456	NM_008632	Mtap2	microtubule-associated protein 2	0	0	1	0	0	0	0	1	0	1	0
mmu-miR-495	MIMAT0003456	NM_008636	Mtf1	metal response element binding transcription factor 1	0	0	1	0	0	0	0	1	0	1	0
mmu-miR-495	MIMAT0003456	NM_008665	Myt1	myelin transcription factor 1	0	0	1	0	0	0	0	1	0	1	0
mmu-miR-495	MIMAT0003456	NM_008666	Myt1l	myelin transcription factor 1-like	0	0	1	0	0	0	0	1	0	1	0
mmu-miR-495	MIMAT0003456	NM_008678	Ncoa2	nuclear receptor coactivator 2	0	0	1	0	0	0	0	1	0	1	0
mmu-miR-495	MIMAT0003456	NM_008684	Neo1	neogenin	0	0	1	0	0	0	0	1	0	1	0
mmu-miR-495	MIMAT0003456	NM_008695	Nid2	nidogen 2	0	0	1	0	0	0	0	1	0	1	0
mmu-miR-495	MIMAT0003456	NM_008702	Nlk	nemo like kinase	0	0	1	0	0	0	0	1	0	1	0
mmu-miR-495	MIMAT0003456	NM_008728	Npr3	natriuretic peptide receptor 3	0	0	1	0	0	0	0	1	0	1	0
mmu-miR-495	MIMAT0003456	NM_008730	Nptx1	neuronal pentraxin 1	0	0	1	0	0	0	0	1	0	1	0
mmu-miR-495	MIMAT0003456	NM_008744	Ntn1	netrin 1	0	0	1	0	0	0	0	1	0	1	0
mmu-miR-495	MIMAT0003456	NM_008778	Pak3	p21 (CDKN1A)-activated kinase 3	0	0	1	0	0	0	0	1	0	1	0
mmu-miR-495	MIMAT0003456	NM_008783	Pbx1	pre B-cell leukemia transcription factor 1	0	0	1	0	0	0	0	1	0	1	0
mmu-miR-495	MIMAT0003456	NM_008802	Pde7a	phosphodiesterase 7A	0	0	1	0	0	0	0	1	0	1	0
mmu-miR-495	MIMAT0003456	NM_008808	Pdgfa	platelet derived growth factor, alpha	0	0	1	0	0	0	0	1	0	1	0
mmu-miR-495	MIMAT0003456	NM_008810	Pdha1	pyruvate dehydrogenase E1 alpha 1	0	0	1	0	0	0	0	1	0	1	0
mmu-miR-495	MIMAT0003456	NM_008857	Prkci	protein kinase C, iota	0	0	1	0	0	0	0	1	0	1	0
mmu-miR-495	MIMAT0003456	NM_008861	Pkd2	polycystic kidney disease 2	0	0	1	0	0	0	0	1	0	1	0
mmu-miR-495	MIMAT0003456	NM_008863	Pkib	protein kinase inhibitor beta, cAMP dependent, testis specific	0	0	1	0	0	0	0	1	0	1	0
mmu-miR-495	MIMAT0003456	NM_008871	Serpine1	serine (or cysteine) peptidase inhibitor, clade E, member 1	0	0	1	0	0	0	0	1	0	1	0
mmu-miR-495	MIMAT0003456	NM_008873	Plau	plasminogen activator, urokinase	0	0	1	0	0	0	0	1	0	1	0
mmu-miR-495	MIMAT0003456	NM_008888	Phox2b	paired-like homeobox 2b	0	0	1	0	0	0	0	1	0	1	0
mmu-miR-495	MIMAT0003456	NM_008938	Prph2	peripherin 2	0	0	1	0	0	0	0	1	0	1	0
mmu-miR-495	MIMAT0003456	NM_008946	Psmb6	proteasome (prosome, macropain) subunit, beta type 6	0	0	1	0	0	0	0	1	0	1	0
mmu-miR-495	MIMAT0003456	NM_008961	Pter	phosphotriesterase related	0	0	1	0	0	0	0	1	0	1	0
mmu-miR-495	MIMAT0003456	NM_008976	Ptpn14	protein tyrosine phosphatase, non-receptor type 14	0	0	1	0	0	0	0	1	0	1	0
mmu-miR-495	MIMAT0003456	NM_009011	Rad23b	RAD23b homolog (S. cerevisiae)	0	0	1	0	0	0	0	1	0	1	0
mmu-miR-495	MIMAT0003456	NM_009019	Rag1	recombination activating gene 1	0	0	1	0	0	0	0	1	0	1	0
mmu-miR-495	MIMAT0003456	NM_009037	Rcn1	reticulocalbin 1	0	0	1	0	0	0	0	1	0	1	0
mmu-miR-495	MIMAT0003456	NM_009040	Rdh16	retinol dehydrogenase 16	0	0	1	0	0	0	0	1	0	1	0
mmu-miR-495	MIMAT0003456	NM_009041	Rdx	radixin	0	0	1	0	0	0	0	1	0	1	0
mmu-miR-495	MIMAT0003456	NM_009050	Ret	ret proto-oncogene	0	0	1	0	0	0	0	1	0	1	0
mmu-miR-495	MIMAT0003456	NM_009072	Rock2	Rho-associated coiled-coil containing protein kinase 2	0	0	1	0	0	0	0	1	0	1	0
mmu-miR-495	MIMAT0003456	NM_009125	Atxn2	ataxin 2	0	0	1	0	0	0	0	1	0	1	0
mmu-miR-495	MIMAT0003456	NM_009127	Scd1	stearoyl-Coenzyme A desaturase 1	0	0	1	0	0	0	0	1	0	1	0
mmu-miR-495	MIMAT0003456	NM_009137	Ccl22	chemokine (C-C motif) ligand 22	0	0	1	0	0	0	0	1	0	1	0
mmu-miR-495	MIMAT0003456	NM_009177	St3gal1	ST3 beta-galactoside alpha-2,3-sialyltransferase 1	0	0	1	0	0	0	0	1	0	1	0
mmu-miR-495	MIMAT0003456	NM_009181	St8sia2	ST8 alpha-N-acetyl-neuraminide alpha-2,8-sialyltransferase 2	0	0	1	0	0	0	0	1	0	1	0
mmu-miR-495	MIMAT0003456	NM_009182	St8sia3	ST8 alpha-N-acetyl-neuraminide alpha-2,8-sialyltransferase 3	0	0	1	0	0	0	0	1	0	1	0
mmu-miR-495	MIMAT0003456	NM_009185	Stil	Scl/Tal1 interrupting locus	0	0	1	0	0	0	0	1	0	1	0
mmu-miR-495	MIMAT0003456	NM_009187	Cox7a2l	cytochrome c oxidase subunit VIIa polypeptide 2-like	0	0	1	0	0	0	0	1	0	1	0
mmu-miR-495	MIMAT0003456	NM_009189	Six1	sine oculis-related homeobox 1 homolog (Drosophila)	0	0	1	0	0	0	0	1	0	1	0
mmu-miR-495	MIMAT0003456	NM_009194	Slc12a2	solute carrier family 12, member 2	0	0	1	0	0	0	0	1	0	1	0
mmu-miR-495	MIMAT0003456	NM_009209	Slc6a2	solute carrier family 6 (neurotransmitter transporter, noradrenalin), member 2	0	0	1	0	0	0	0	1	0	1	0
mmu-miR-495	MIMAT0003456	NM_009210	Hltf	helicase-like transcription factor	0	0	1	0	0	0	0	1	0	1	0
mmu-miR-495	MIMAT0003456	NM_009212	Ighmbp2	immunoglobulin mu binding protein 2	0	0	1	0	0	0	0	1	0	1	0
mmu-miR-495	MIMAT0003456	NM_009239	Sp4	trans-acting transcription factor 4	0	0	1	0	0	0	0	1	0	1	0
mmu-miR-495	MIMAT0003456	NM_009243	Serpina1a	serine (or cysteine) peptidase inhibitor, clade A, member 1a	0	0	1	0	0	0	0	1	0	1	0
mmu-miR-495	MIMAT0003456	NM_009282	Stag1	stromal antigen 1	0	0	1	0	0	0	0	1	0	1	0
mmu-miR-495	MIMAT0003456	NM_009283	Stat1	signal transducer and activator of transcription 1	0	0	1	0	0	0	0	1	0	1	0
mmu-miR-495	MIMAT0003456	NM_009295	Stxbp1	syntaxin binding protein 1	0	0	1	0	0	0	0	1	0	1	0
mmu-miR-495	MIMAT0003456	NM_009301	Svs5	seminal vesicle secretory protein 5	0	0	1	0	0	0	0	1	0	1	0
mmu-miR-495	MIMAT0003456	NM_009303	Syngr1	synaptogyrin 1	0	0	1	0	0	0	0	1	0	1	0
mmu-miR-495	MIMAT0003456	NM_009320	Slc6a6	solute carrier family 6 (neurotransmitter transporter, taurine), member 6	0	0	1	0	0	0	0	1	0	1	0
mmu-miR-495	MIMAT0003456	NM_009333	Tcf7l2	transcription factor 7-like 2, T-cell specific, HMG-box	0	0	1	0	0	0	0	1	0	1	0
mmu-miR-495	MIMAT0003456	NM_009334	Tcfap2b	transcription factor AP-2 beta	0	0	1	0	0	0	0	1	0	1	0
mmu-miR-495	MIMAT0003456	NM_009385	Nkx2-1	NK2 homeobox 1	0	0	1	0	0	0	0	1	0	1	0
mmu-miR-495	MIMAT0003456	NM_009389	Tle3	transducin-like enhancer of split 3, homolog of Drosophila E(spl)	0	0	1	0	0	0	0	1	0	1	0
mmu-miR-495	MIMAT0003456	NM_009398	Tnfaip6	tumor necrosis factor alpha induced protein 6	0	0	1	1	0	0	0	1	0	0	0
mmu-miR-495	MIMAT0003456	NM_009424	Traf6	Tnf receptor-associated factor 6	0	0	1	0	0	0	0	1	0	1	0
mmu-miR-495	MIMAT0003456	NM_009483	Utx	ubiquitously transcribed tetratricopeptide repeat gene, X chromosome	0	0	1	0	0	0	0	1	0	1	0
mmu-miR-495	MIMAT0003456	NM_009484	Uty	ubiquitously transcribed tetratricopeptide repeat gene, Y chromosome	0	0	1	0	0	0	0	1	0	1	0
mmu-miR-495	MIMAT0003456	NM_009496	Vamp1	vesicle-associated membrane protein 1	0	0	1	0	0	0	0	1	0	1	0
mmu-miR-495	MIMAT0003456	NM_009502	Vcl	vinculin	0	0	1	0	0	0	0	1	0	1	0
mmu-miR-495	MIMAT0003456	NM_009507	Vhl	von Hippel-Lindau syndrome	0	0	1	0	0	0	0	1	0	1	0
mmu-miR-495	MIMAT0003456	NM_009511	Vipr2	vasoactive intestinal peptide receptor 2	0	0	1	0	0	0	0	1	0	1	0
mmu-miR-495	MIMAT0003456	NM_009531	Xpc	xeroderma pigmentosum, complementation group C	0	0	1	0	0	0	0	1	0	1	0
mmu-miR-495	MIMAT0003456	NM_009564	Zfp64	zinc finger protein 64	0	0	1	0	0	0	0	1	0	1	0
mmu-miR-495	MIMAT0003456	NM_009579	Slc30a1	solute carrier family 30 (zinc transporter), member 1	0	0	1	0	0	0	0	1	0	1	0
mmu-miR-495	MIMAT0003456	NM_009582	Map3k12	mitogen-activated protein kinase kinase kinase 12	0	0	1	0	0	0	0	1	0	1	0
mmu-miR-495	MIMAT0003456	NM_009595	Abl2	v-abl Abelson murine leukemia viral oncogene homolog 2 (arg, Abelson-related gene)	0	0	1	0	0	0	0	1	0	1	0
mmu-miR-495	MIMAT0003456	NM_009601	Chrnb1	cholinergic receptor, nicotinic, beta polypeptide 1 (muscle)	0	0	1	0	0	0	0	1	0	1	0
mmu-miR-495	MIMAT0003456	NM_009602	Chrnb2	cholinergic receptor, nicotinic, beta polypeptide 2 (neuronal)	0	0	1	0	0	0	0	1	0	1	0
mmu-miR-495	MIMAT0003456	NM_009622	Adcy1	adenylate cyclase 1	0	0	1	0	0	0	0	1	0	1	0
mmu-miR-495	MIMAT0003456	NM_009642	Agtrap	angiotensin II, type I receptor-associated protein	0	0	1	0	0	0	0	1	0	1	0
mmu-miR-495	MIMAT0003456	NM_009644	Ahrr	aryl-hydrocarbon receptor repressor	0	0	1	0	0	0	0	1	0	1	0
mmu-miR-495	MIMAT0003456	NM_009647	Ak3l1	adenylate kinase 3-like 1	0	0	1	0	0	0	0	1	0	1	0
mmu-miR-495	MIMAT0003456	NM_009649	Akap2	A kinase (PRKA) anchor protein 2	0	0	1	0	0	0	0	1	0	1	0
mmu-miR-495	MIMAT0003456	NM_009665	Amd1	S-adenosylmethionine decarboxylase 1	0	0	1	0	0	0	0	1	0	1	0
mmu-miR-495	MIMAT0003456	NM_009671	Ankfy1	ankyrin repeat and FYVE domain containing 1	0	0	1	0	0	0	0	1	0	1	0
mmu-miR-495	MIMAT0003456	NM_009672	Anp32a	acidic (leucine-rich) nuclear phosphoprotein 32 family, member A	0	0	1	0	0	0	0	1	0	1	0
mmu-miR-495	MIMAT0003456	NM_009674	Anxa7	annexin A7	0	0	1	0	0	0	0	1	0	1	0
mmu-miR-495	MIMAT0003456	NM_009675	Aoc3	amine oxidase, copper containing 3	0	0	1	0	0	0	0	1	0	1	0
mmu-miR-495	MIMAT0003456	NM_009682	Ap3s2	adaptor-related protein complex 3, sigma 2 subunit	0	0	1	0	0	0	0	1	0	1	0
mmu-miR-495	MIMAT0003456	NM_009697	Nr2f2	nuclear receptor subfamily 2, group F, member 2	0	0	1	0	0	0	0	1	0	1	0
mmu-miR-495	MIMAT0003456	NM_009718	Neurog2	neurogenin 2	0	0	1	0	0	0	0	1	0	1	0
mmu-miR-495	MIMAT0003456	NM_009727	Atp8a1	ATPase, aminophospholipid transporter (APLT), class I, type 8A, member 1	0	0	1	0	0	0	0	1	0	1	0
mmu-miR-495	MIMAT0003456	NM_009740	Bcl10	B-cell leukemia/lymphoma 10	0	0	1	0	0	0	0	1	0	1	0
mmu-miR-495	MIMAT0003456	NM_009754	Bcl2l11	BCL2-like 11 (apoptosis facilitator)	0	0	1	0	0	0	0	1	0	1	0
mmu-miR-495	MIMAT0003456	NM_009759	Bmx	BMX non-receptor tyrosine kinase	0	0	1	0	0	0	0	1	0	1	0
mmu-miR-495	MIMAT0003456	NM_009760	Bnip3	BCL2/adenovirus E1B interacting protein 1, NIP3	0	0	1	0	0	0	0	1	0	1	0
mmu-miR-495	MIMAT0003456	NM_009762	Smyd1	SET and MYND domain containing 1	0	0	1	0	0	0	0	1	0	1	0
mmu-miR-495	MIMAT0003456	NM_009774	Bub3	budding uninhibited by benzimidazoles 3 homolog (S. cerevisiae)	0	0	1	0	0	0	0	1	0	1	0
mmu-miR-495	MIMAT0003456	NM_009779	C3ar1	complement component 3a receptor 1	0	0	1	0	0	0	0	1	0	1	0
mmu-miR-495	MIMAT0003456	NM_009786	Cacybp	calcyclin binding protein	0	0	1	0	0	0	0	1	0	1	0
mmu-miR-495	MIMAT0003456	NM_009793	Camk4	calcium/calmodulin-dependent protein kinase IV	0	0	1	0	0	0	0	1	0	1	0
mmu-miR-495	MIMAT0003456	NM_009797	Capza1	capping protein (actin filament) muscle Z-line, alpha 1	0	0	1	0	0	0	0	1	0	1	0
mmu-miR-495	MIMAT0003456	NM_009801	Car2	carbonic anhydrase 2	0	0	1	0	0	0	0	1	0	1	0
mmu-miR-495	MIMAT0003456	NM_009806	Cask	calcium/calmodulin-dependent serine protein kinase (MAGUK family)	0	0	1	0	0	0	0	1	0	1	0
mmu-miR-495	MIMAT0003456	NM_009808	Casp12	caspase 12	0	0	1	0	0	0	0	1	0	1	0
mmu-miR-495	MIMAT0003456	NM_009811	Casp6	caspase 6	0	0	1	0	0	0	0	1	0	1	0
mmu-miR-495	MIMAT0003456	NM_009861	Cdc42	cell division cycle 42 homolog (S. cerevisiae)	0	0	1	1	0	0	0	1	0	0	0
mmu-miR-495	MIMAT0003456	NM_009871	Cdk5r1	cyclin-dependent kinase 5, regulatory subunit (p35) 1	0	0	1	0	0	0	0	1	0	1	0
mmu-miR-495	MIMAT0003456	NM_009879	Ift81	intraflagellar transport 81 homolog (Chlamydomonas)	0	0	1	0	0	0	0	1	0	1	0
mmu-miR-495	MIMAT0003456	NM_009913	Ccr9	chemokine (C-C motif) receptor 9	0	0	1	0	0	0	0	1	0	1	0
mmu-miR-495	MIMAT0003456	NM_009924	Cnr2	cannabinoid receptor 2 (macrophage)	0	0	1	0	0	0	0	1	0	1	0
mmu-miR-495	MIMAT0003456	NM_009951	Igf2bp1	insulin-like growth factor 2 mRNA binding protein 1	0	0	1	0	0	0	0	1	0	1	0
mmu-miR-495	MIMAT0003456	NM_009955	Dpysl2	dihydropyrimidinase-like 2	0	0	1	0	0	0	0	1	0	1	0
mmu-miR-495	MIMAT0003456	NM_009957	Pcdha7	protocadherin alpha 7	0	0	1	0	0	0	0	1	0	1	0
mmu-miR-495	MIMAT0003456	NM_009959	Pcdha5	protocadherin alpha 5	0	0	1	0	0	0	0	1	0	1	0
mmu-miR-495	MIMAT0003456	NM_009960	Pcdha11	protocadherin alpha 11	0	0	1	0	0	0	0	1	0	1	0
mmu-miR-495	MIMAT0003456	NM_009961	Pcdha10	protocadherin alpha 10	0	0	1	0	0	0	0	1	0	1	0
mmu-miR-495	MIMAT0003456	NM_009963	Cry2	cryptochrome 2 (photolyase-like)	0	0	1	0	0	0	0	1	0	1	0
mmu-miR-495	MIMAT0003456	NM_009994	Cyp1b1	cytochrome P450, family 1, subfamily b, polypeptide 1	0	0	1	0	0	0	0	1	0	1	0
mmu-miR-495	MIMAT0003456	NM_010007	Cyp2j5	cytochrome P450, family 2, subfamily j, polypeptide 5	0	0	1	0	0	0	0	1	0	1	0
mmu-miR-495	MIMAT0003456	NM_010015	Dad1	defender against cell death 1	0	0	1	0	0	0	0	1	0	1	0
mmu-miR-495	MIMAT0003456	NM_010049	Dhfr	dihydrofolate reductase	0	0	1	0	0	0	0	1	0	1	0
mmu-miR-495	MIMAT0003456	NM_010066	Dnmt1	DNA methyltransferase (cytosine-5) 1	0	0	1	0	0	0	0	1	0	1	0
mmu-miR-495	MIMAT0003456	NM_010093	E2f3	E2F transcription factor 3	0	0	1	0	0	0	0	1	0	1	0
mmu-miR-495	MIMAT0003456	NM_010099	Eda	ectodysplasin-A	0	0	1	0	0	0	0	1	0	1	0
mmu-miR-495	MIMAT0003456	NM_010100	Edar	ectodysplasin-A receptor	0	0	1	0	0	0	0	1	0	1	0
[truncated: 1,069 more rows]
